# Supplementary material
Source: PubMed Central journal article supplement (PMC7269848)
Supplement: NIHMS1584760-supplement-supporting_info.pdf [file NIHMS1584760-supplement-supporting_info.pdf]

Supporting Information for

**Pd(II)-Catalyzed Enantioselective C(*sp*<sup>3</sup>)-H Arylation of  
Cyclobutyl Ketones Using a Chiral Transient Directing Group**

Li-Jun Xiao,<sup>†</sup> Kai Hong,<sup>†</sup> Fan Luo,<sup>†</sup> Liang Hu,<sup>†</sup> William R. Ewing,<sup>‡</sup> Kap-Sun Yeung,<sup>§</sup> Jin-

Quan Yu<sup>\*,†</sup>

<sup>†</sup>Department of Chemistry, The Scripps Research Institute, 10550 N. Torrey Pines Road, La Jolla, California 92037, United States

<sup>‡</sup>Discovery Chemistry, Bristol-Myers Squibb, PO Box 4000, Princeton, New Jersey 08543, United States

<sup>§</sup>Discovery Chemistry, Bristol-Myers Squibb Research and Development, 100 Binney Street, Cambridge, MA 02142, United States

\*Email: [yu200@scripps.edu](mailto:yu200@scripps.edu)

## Table of Contents

|                                                                                                                                     |      |
|-------------------------------------------------------------------------------------------------------------------------------------|------|
| 1. General Information .....                                                                                                        | S3   |
| 2. General Procedure for the Preparation of Ketone Substrates .....                                                                 | S4   |
| 3. Optimization of the Reaction Conditions .....                                                                                    | S7   |
| 4. General Procedure for the Enantioselective C( <i>sp</i> <sup>3</sup> )-H Arylation and Characterization<br>of the Products ..... | S11  |
| 5. Diverse Chiral Cyclobutanes via Sequential C-H Arylation.....                                                                    | S28  |
| 6. Deuterium-Labeling Experiments.....                                                                                              | S31  |
| 7. References.....                                                                                                                  | S33  |
| 8. NMR Spectra.....                                                                                                                 | S34  |
| 9. HPLC Data.....                                                                                                                   | S73  |
| 10. X-Ray Crystallographic Data.....                                                                                                | S106 |

## 1. General Information

Ketone substrates were obtained from the commercial sources or synthesized following literature procedures. Aryl iodides were obtained from the commercial sources. Solvents were obtained from Sigma-Aldrich, Oakwood and Acros and used directly without further purification. Analytical thin layer chromatography was performed on 0.25 mm silica gel 60-F254. Visualization was carried out with UV light and Bromocresol Green Stain.  $^1\text{H}$  NMR was recorded on Bruker DRX-600 instrument (500 MHz). Chemical shifts were quoted in parts per million (ppm) referenced to the literature values of tetramethylsilane. The following abbreviations (or combinations thereof) were used to explain multiplicities: s = singlet, d = doublet, t = triplet, q = quartet, p = pentet, m = multiplet, br = broad. coupling constants, J, were reported in Hertz unit (Hz).  $^{13}\text{C}$  NMR spectra were recorded on Bruker DRX-600 instrument (126 MHz), and were fully decoupled by broad band proton decoupling. Chemical shifts were reported in ppm referenced to either the center line of a triplet at 77.16 ppm of chloroform-*d*. High-resolution mass spectra (HRMS) were recorded on an Agilent Mass spectrometer using ESI-TOF (electrospray ionization-time of flight). Enantiomeric excesses values were determined on a Hitachi LaChrom Elite HPLC system or Agilent Technologies supercritical fluid chromatography (SFC) system using commercially available chiral columns. Melting points were recorded on a Fisher-Johns 12-144 melting point apparatus and are uncorrected. Optical rotation data was recorded on an Anton Paar 100 Modular Circular Polarimeter. X-ray crystallographic analysis was done at the X-ray crystallography facility, Department of Chemistry and Biochemistry, University of California, San Diego (UCSD).

## 2. General Procedure for the Preparation of Ketone Substrates<sup>1</sup>

### Scheme S1

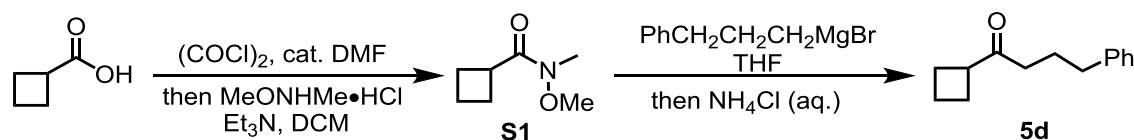

To a solution of cyclobutanecarboxylic acid (10.0 mmol) in DCM (12 mL) was added  $(\text{COCl})_2$  (11.0 mmol, 1.1 equiv.) and one drop of DMF at 0 °C. The reaction was allowed to warm to rt and stirred for 3 h, then concentrated in vacuo. The reaction mixture was dissolved in 24 mL of DCM and cooled to 0 °C.  $\text{MeONHMe}\cdot\text{HCl}$  (12.0 mmol, 1.2 equiv.) was added in one portion, followed by triethylamine (30.0 mmol, 3.0 equiv.). The reaction was allowed to warm to rt and stirred overnight. Upon completion, 30 mL of water was added. The reaction mixture was extracted with diethyl ether (50 mL $\times$ 3), and the combined organic layers were dried over anhydrous  $\text{Na}_2\text{SO}_4$ , filtered, concentrated. The amide **S1** used in the next step without further purification. To a solution of amide **S1** in THF was added phenylpropylmagnesium bromide (1.0 M in THF, 1.5 equiv.) at 0°C. The reaction was slowly warmed to rt and stirred for 4 h, then quenched with 1 M HCl solution. The reaction mixture was extracted with EtOAc (50 mL $\times$ 3), and the combined organic layers were dried over anhydrous  $\text{Na}_2\text{SO}_4$ , filtered and concentrated. The crude product was then purified on silica gel to afford the desired ketone product **5d**.

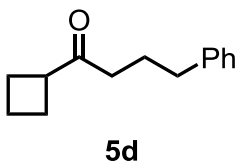

### 1-cyclobutyl-4-phenylbutan-1-one (**5d**)

$^1\text{H}$  NMR (500 MHz,  $\text{CDCl}_3$ )  $\delta$  7.31–7.23 (m, 2H), 7.17 (dd,  $J = 11.7, 7.0$  Hz, 3H), 3.22 (pd,  $J = 8.6, 1.1$  Hz, 1H), 2.65–2.53 (m, 2H), 2.35 (t,  $J = 7.3$  Hz, 2H), 2.25–2.15 (m, 2H), 2.14–2.06 (m, 2H), 2.03–1.85 (m, 3H), 1.79 (m, 1H).  $^{13}\text{C}$  NMR (126 MHz,  $\text{CDCl}_3$ )  $\delta$  211.8, 141.8, 128.6, 128.4, 126.0, 45.5, 39.3, 35.3, 25.2, 24.5, 17.8.

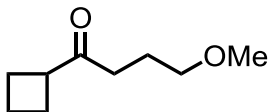

**5e**

**1-cyclobutyl-4-methoxybutan-1-one (5e)**

$^1\text{H}$  NMR (500 MHz,  $\text{CDCl}_3$ )  $\delta$  3.37 (t,  $J = 6.2$  Hz, 2H), 3.31 (s, 3H), 3.25 (qd,  $J = 8.5, 1.1$  Hz, 1H), 2.44 (t,  $J = 7.2$  Hz, 2H), 2.27–2.17 (m, 2H), 2.17–2.08 (m, 2H), 2.03–1.90 (m, 1H), 1.90–1.74 (m, 3H).  $^{13}\text{C}$  NMR (126 MHz,  $\text{CDCl}_3$ )  $\delta$  211.7, 71.9, 58.6, 45.5, 36.4, 24.5, 23.7, 17.8.

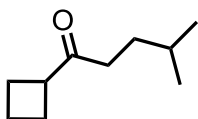

**5f**

**1-cyclobutyl-4-methylpentan-1-one (5f)**

$^1\text{H}$  NMR (500 MHz,  $\text{CDCl}_3$ )  $\delta$  3.24 (pd,  $J = 8.5, 2.9$  Hz, 1H), 2.32 (td,  $J = 7.8, 3.1$  Hz, 2H), 2.25–2.15 (m, 2H), 2.15–2.06 (m, 2H), 1.98–1.88 (m, 1H), 1.83–1.72 (m, 1H), 1.54–1.46 (m, 1H), 1.46–1.39 (m, 2H), 0.85 (d,  $J = 4.0$  Hz, 6H).  $^{13}\text{C}$  NMR (126 MHz,  $\text{CDCl}_3$ )  $\delta$  212.5, 45.5, 38.2, 32.7, 27.9, 24.5, 22.5, 17.8.

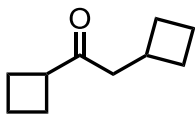

**5g**

**1,2-dicyclobutylethan-1-one (5g)**

$^1\text{H}$  NMR (500 MHz,  $\text{CDCl}_3$ )  $\delta$  3.17 (pd,  $J = 8.6, 3.0$  Hz, 1H), 2.64 (pd,  $J = 7.9, 3.2$  Hz, 1H), 2.43 (dd,  $J = 7.4, 3.1$  Hz, 2H), 2.27–2.02 (m, 6H), 2.00–1.69 (m, 4H), 1.68–1.48 (m, 2H).  $^{13}\text{C}$  NMR (126 MHz,  $\text{CDCl}_3$ )  $\delta$  211.5, 47.4, 45.4, 31.6, 28.7, 24.3, 18.8, 17.7.

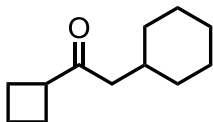

**5h**

**1-cyclobutyl-2-cyclohexylethan-1-one (5h)**

$^1\text{H}$  NMR (500 MHz,  $\text{CDCl}_3$ )  $\delta$  3.22 (p,  $J = 8.6$  Hz, 1H), 2.33–2.17 (m, 4H), 2.15–2.06 (m, 2H), 2.01–1.90 (m, 1H), 1.87–1.74 (m, 1H), 1.78–1.59 (m, 6H), 1.34–1.21 (m, 2H), 1.21–1.07 (m, 1H), 0.98–0.79 (m, 2H).  $^{13}\text{C}$  NMR (126 MHz,  $\text{CDCl}_3$ )  $\delta$  211.9, 45.9, 38.1, 33.6, 33.4, 26.4, 26.2, 24.3, 17.8.

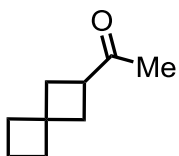

**5i**

**1-(spiro[3.3]heptan-2-yl)ethan-1-one (5i)**

$^1\text{H}$  NMR (500 MHz,  $\text{CDCl}_3$ )  $\delta$  3.13–3.03 (m, 1H), 2.20–2.12 (m, 4H), 2.08–1.97 (m, 5H), 1.90–1.84 (m, 2H), 1.83–1.74 (m, 2H).  $^{13}\text{C}$  NMR (126 MHz,  $\text{CDCl}_3$ )  $\delta$  210.1, 41.0, 39.5, 37.2, 35.5, 34.6, 27.3, 16.3.

### 3. Optimization of the Reaction Conditions

**Table S1. Ligand Evaluation**<sup>a,b</sup>

| None                                         | HOAc                                         | <sup>t</sup> BuCO <sub>2</sub> H             |                                              |                                             |
|----------------------------------------------|----------------------------------------------|----------------------------------------------|----------------------------------------------|---------------------------------------------|
| <5%, er N.D.                                 | <b>L1</b><br>30%, 33:67 er                   | <b>L2</b><br>22%, 35:65 er                   | <b>L3</b><br>11%, 34:66 er                   | <b>L4</b><br>14%, 35:65 er                  |
|                                              |                                              |                                              |                                              |                                             |
| (±)- <b>L5</b><br><5%, er N.D.               | <b>L6</b><br>14%, 25:75 er                   | <b>L7</b><br>29%, 17:83 er<br>8% <i>di</i>   | <b>L8</b><br>16%, 18:82 er                   | <b>L9</b><br>24%, 15:85 er<br>45% <i>di</i> |
|                                              |                                              |                                              |                                              |                                             |
| <b>L10</b><br>32%, 25:75 er<br>48% <i>di</i> | <b>L11</b><br>31%, 20:80 er<br>30% <i>di</i> | <b>L12</b><br>25%, 17:83 er<br>52% <i>di</i> | <b>L13</b><br>22%, 19:81 er<br>43% <i>di</i> |                                             |

<sup>a</sup> Conditions: **1a** (0.2 mmol, 2.0 equiv), methyl 4-iodobenzoate (1.0 equiv), Pd(OAc)<sub>2</sub> (10 mol %), **TDG1** (30 mol %), ligand (40 mol %), AgTFA (2.0 equiv), HFIP (0.6 mL), 100 °C, under air, 24 h. <sup>b</sup> Yield determined by <sup>1</sup>H NMR analysis of the crude product using CH<sub>2</sub>Br<sub>2</sub> as internal standard.

**Table S2. Acid Additive Evaluation**<sup>a,b</sup>

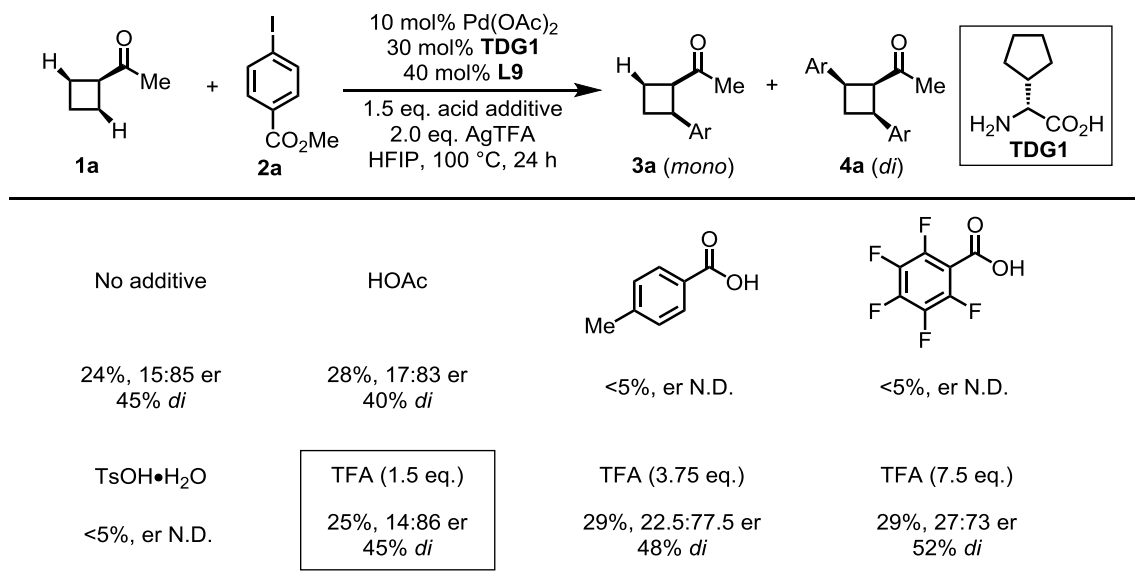

<sup>a</sup> Conditions: **1a** (0.2 mmol, 2.0 equiv), methyl 4-iodobenzoate (1.0 equiv), Pd(OAc)<sub>2</sub> (10 mol %), **TDG1** (30 mol %), **L9** (40 mol %), acid additive (1.5 equiv), AgTFA (2.0 equiv), HFIP (0.6 mL), 100 °C, under air, 24 h. <sup>b</sup> Yield determined by <sup>1</sup>H NMR analysis of the crude product using CH<sub>2</sub>Br<sub>2</sub> as internal standard.

**Table S3. Silver Salt Evaluation**<sup>a,b</sup>

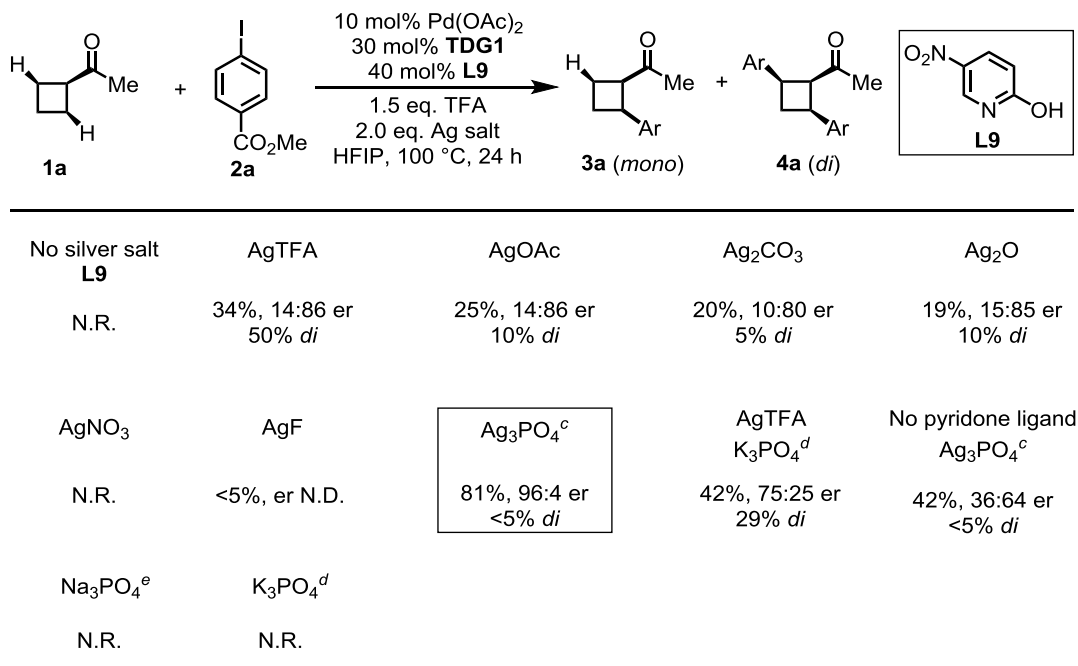



<sup>a</sup> Conditions: **1a** (0.2 mmol, 2.0 equiv), methyl 4-iodobenzoate (1.0 equiv), Pd(OAc)<sub>2</sub> (10 mol %), **TDG1** (30 mol %), **L9** (40 mol %), TFA (1.5 equiv), silver salt (2.0 equiv), HFIP (0.6 mL), 100 °C, under air, 24 h. <sup>b</sup> Yield determined by <sup>1</sup>H NMR analysis of the crude product using CH<sub>2</sub>Br<sub>2</sub> as internal standard. <sup>c</sup> Ag<sub>3</sub>PO<sub>4</sub> (1.0 equiv). <sup>d</sup> K<sub>3</sub>PO<sub>4</sub> (1.0 equiv). <sup>e</sup> Na<sub>3</sub>PO<sub>4</sub> (1.0 equiv)

**Table S4. Transient Directing Group Evaluation**<sup>a,b</sup>

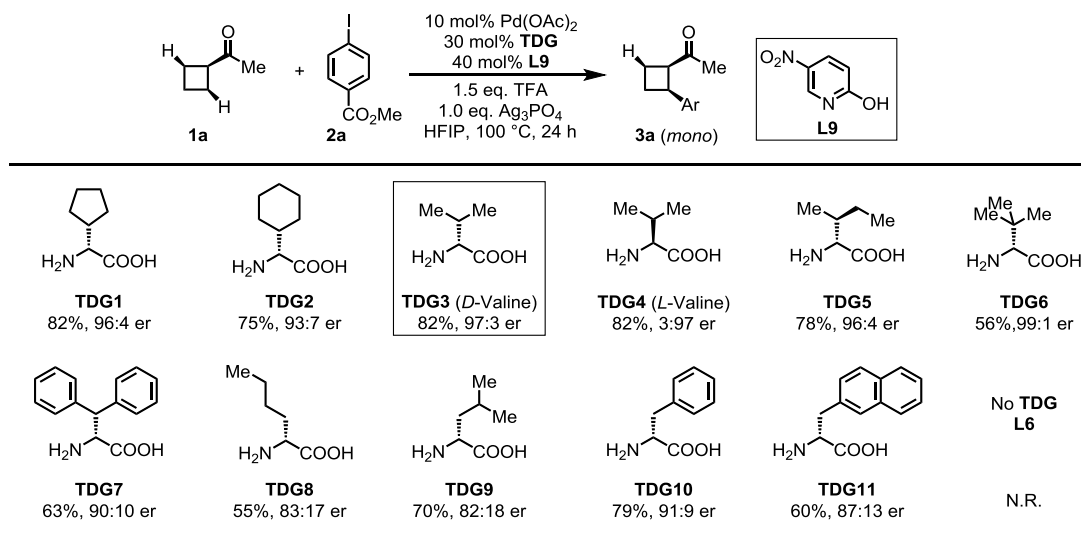

<sup>a</sup> Conditions: **1a** (0.2 mmol, 2.0 equiv), methyl 4-iodobenzoate (1.0 equiv), Pd(OAc)<sub>2</sub> (10 mol %), **TDG** (30 mol %), **L9** (40 mol %), TFA (1.5 equiv), Ag<sub>3</sub>PO<sub>4</sub> (1.0 equiv), HFIP (0.6 mL), 100 °C, under air, 24 h. <sup>b</sup> Yield determined by <sup>1</sup>H NMR analysis of the crude product using CH<sub>2</sub>Br<sub>2</sub> as internal standard.

**Table S5. Pyridone Ligand Evaluation in the Presence of Ag<sub>3</sub>PO<sub>4</sub>**<sup>a,b</sup>

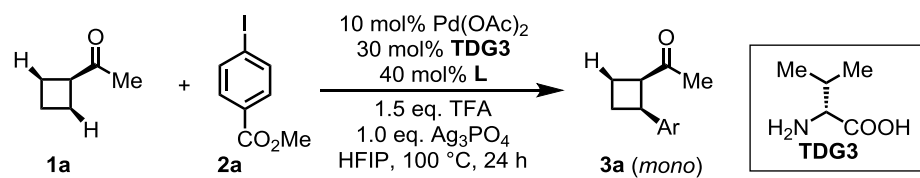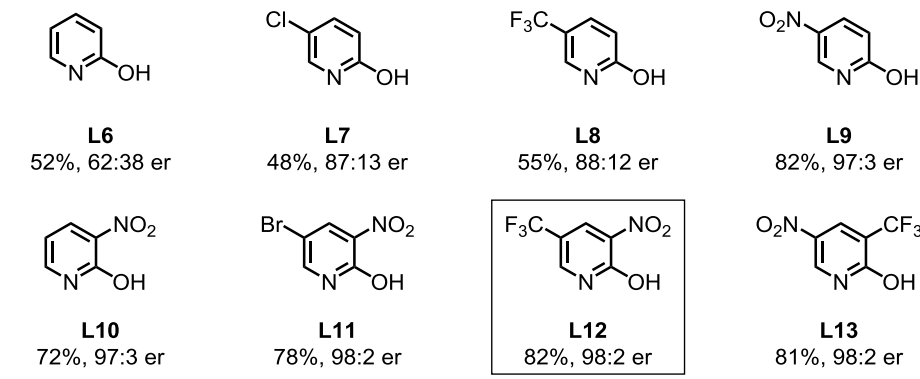

<sup>a</sup> Conditions: **1a** (0.2 mmol, 2.0 equiv), methyl 4-iodobenzoate (1.0 equiv), Pd(OAc)<sub>2</sub> (10 mol %), **TDG3** (30 mol %), **L** (40 mol %), TFA (1.5 equiv), Ag<sub>3</sub>PO<sub>4</sub> (1.0 equiv), HFIP (0.6 mL), 100 °C, under air, 24 h. <sup>b</sup> Yield determined by <sup>1</sup>H NMR analysis of the crude product using CH<sub>2</sub>Br<sub>2</sub> as internal standard.

**Table S6: Selected Unsuccessful Substrates**

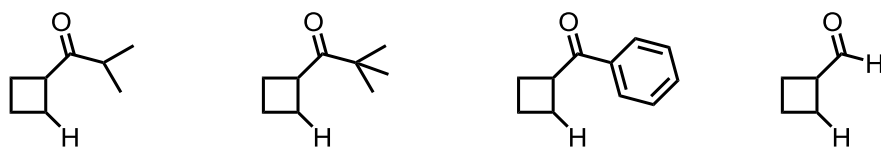

#### 4. General Procedure for the Enantioselective C(sp<sup>3</sup>)-H Arylation and Characterization of the Products

To an oven-dried microwave tube (5 mL) equipped with a magnetic stir bar was added Pd(OAc)<sub>2</sub> (0.01 mmol, 10 mol %), transient directing groups (**TDG3**, 0.03 mmol, 30 mol %), ligand (**L12**, 0.04 mmol, 40 mol %), ArI (0.1 mmol), Ag<sub>3</sub>PO<sub>4</sub> (0.1 mmol, 1.0 equiv), and solvent (HFIP, 0.6 mL and 0.15 mmol of TFA), followed by the ketone substrate (0.2 mmol, 2.0 equiv). The tube was sealed and stirred at room temperature for 10 min before heating to 100 °C for 24 h under vigorous stirring. Upon completion, the reaction mixture was cooled to room temperature and the dark brown suspension was passed through a pad of Celite and washed with acetone (1.0 mL × 3). The resulting solution was concentrated and purified by preparative thin-layer chromatography to afford the desired product. Unless otherwise specified, the racemic product was prepared according to previously reported procedure.<sup>1,2</sup>

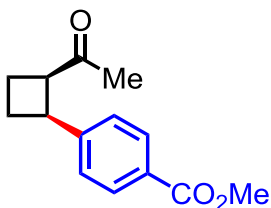

**3a**

##### methyl 4-((1*S*,2*R*)-2-acetylcyclobutyl)benzoate (**3a**)

Colorless oil (18.3 mg, 79% yield, 98:2 er).  $[\alpha]_D^{20} = +18.6$  ( $c = 1.0$ , CHCl<sub>3</sub>). The er ratio was determined by a Hitachi LaChrom Elite HPLC analysis on a Chiralpak IC column (20% isopropanol in hexane, 2.0 mL/min) with retention time 8.4 min (major) and 21.9 min (minor). <sup>1</sup>H NMR (500 MHz, CDCl<sub>3</sub>) δ 7.98 (d,  $J = 8.4$  Hz, 2H), 7.31 (d,  $J = 8.0$  Hz, 2H), 3.91 (s, 3H), 3.77 (q,  $J = 9.1$  Hz, 1H), 3.36–3.27 (m, 1H), 2.27–2.14 (m, 4H), 2.06 (s, 3H). <sup>13</sup>C NMR (126 MHz, CDCl<sub>3</sub>) δ 208.5, 167.1, 149.1, 130.0, 128.5, 126.8, 53.7, 52.2, 42.2, 27.9, 24.7, 21.6. HRMS (ESI-TOF) Calcd for C<sub>14</sub>H<sub>17</sub>O<sub>3</sub><sup>+</sup> [M+H]<sup>+</sup>: 233.1178; found: 233.1173.

The absolute stereochemistry was assigned by analogy to compound **7a** and **7b**.

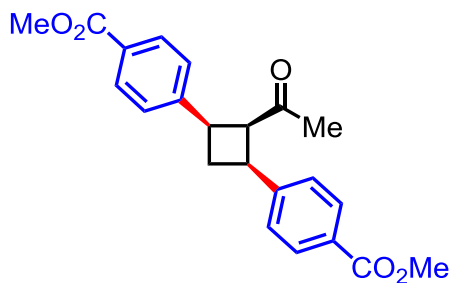

**4a**

**dimethyl 4,4'-2-acetylcyclobutane-1,3-diyl)dibenzoate (4a)**

Colorless oil (50% yield under this condition: **TDG1** (30 mol %), **L9** (40 mol %), TFA (1.5 equiv), AgTFA (2.0 equiv), HFIP (0.6 mL), 100 °C, under air, 24 h.) <sup>1</sup>H NMR (500 MHz, CDCl<sub>3</sub>) δ 8.02 (d, *J* = 8.3 Hz, 4H), 7.36 (d, *J* = 8.3 Hz, 4H), 3.92 (s, 6H), 3.71 (td, *J* = 9.8, 8.0 Hz, 2H), 3.40 (t, *J* = 9.5 Hz, 1H), 2.74 (ddd, *J* = 10.7, 8.6, 7.7 Hz, 1H), 2.34 (q, *J* = 10.4 Hz, 1H), 1.98 (s, 3H). <sup>13</sup>C NMR (126 MHz, CDCl<sub>3</sub>) δ 207.0, 167.0, 148.0, 130.2, 128.9, 127.0, 61.1, 52.3, 39.3, 32.5, 28.9. HRMS (ESI-TOF) Calcd for C<sub>22</sub>H<sub>23</sub>O<sub>5</sub><sup>+</sup> [M+H]<sup>+</sup>: 367.1545; found: 367.1539.

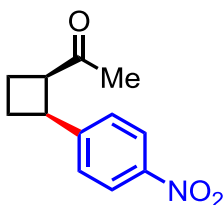

**3b**

**1-((1R,2S)-2-(4-nitrophenyl)cyclobutyl)ethan-1-one (3b)**

Colorless oil (15.4 mg, 70% yield, 97:3 er). [ $\alpha$ ]<sub>D</sub><sup>20</sup> = +17.2 (*c* = 1.0, CHCl<sub>3</sub>). The er ratio was determined a Hitachi LaChrom Elite HPLC analysis on a Chiralpak IC column (20% isopropanol in hexane, 1.5 mL/min) with retention time 10.66 min (minor) and 11.74 min (major). <sup>1</sup>H NMR (500 MHz, CDCl<sub>3</sub>) δ 8.17 (d, *J* = 8.8 Hz, 2H), 7.38 (d, *J* = 8.2 Hz, 2H), 3.87 (q, *J* = 9.4 Hz, 1H), 3.36–3.25 (m, 1H), 2.33–2.25 (m, 2H), 2.22–2.16 (m, 2H), 2.10 (s, 3H). <sup>13</sup>C NMR (126 MHz, CDCl<sub>3</sub>) δ 208.2, 151.5, 146.7, 127.6, 123.9, 53.6, 41.3, 27.7, 24.4, 22.1. HRMS (ESI-TOF) Calcd for C<sub>13</sub>H<sub>14</sub>NO<sub>3</sub><sup>+</sup> [M+H]<sup>+</sup>: 220.0974; found: 220.0975.

The absolute stereochemistry was assigned by analogy to compound **7a** and **7b**.

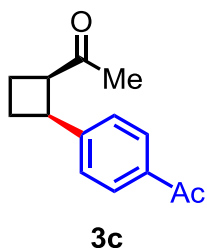

### 1-(4-((1*S*,2*R*)-2-acetylcyclobutyl)phenyl)ethan-1-one (**3c**)

Colorless oil (13.9 mg, 64% yield, 98:2 er).  $[\alpha]_{\text{D}}^{20} = +19.4$  ( $c = 1.0$ ,  $\text{CHCl}_3$ ). The er ratio was determined by a Hitachi LaChrom Elite HPLC analysis on a Chiralpak IC column (20% isopropanol in hexane, 2.0 mL/min) with retention time 13.51 min (major) and 29.86 min (minor).  $^1\text{H}$  NMR (500 MHz,  $\text{CDCl}_3$ )  $\delta$  7.91 (d,  $J = 8.4$  Hz, 2H), 7.33 (d,  $J = 8.0$  Hz, 2H), 3.82–3.75 (m, 1H), 3.36–3.27 (m, 1H), 2.59 (s, 3H), 2.27–2.13 (m, 4H), 2.06 (s, 3H).  $^{13}\text{C}$  NMR (126 MHz,  $\text{CDCl}_3$ )  $\delta$  208.5, 197.9, 149.4, 135.6, 128.8, 128.8, 127.0, 126.9, 53.6, 42.1, 27.9, 26.7, 24.7, 21.6. HRMS (ESI-TOF) Calcd for  $\text{C}_{14}\text{H}_{17}\text{O}_2^+$   $[\text{M}+\text{H}]^+$ : 217.1229; found: 217.1225.

The absolute stereochemistry was assigned by analogy to compound **7a** and **7b**.

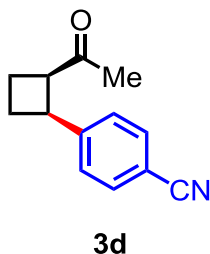

### 4-((1*S*,2*R*)-2-acetylcyclobutyl)benzonitrile (**3d**)

Colorless oil (16 mg, 80% yield, 95:5 er).  $[\alpha]_{\text{D}}^{20} = +38.9$  ( $c = 1.0$ ,  $\text{CHCl}_3$ ). The er ratio was determined by a Hitachi LaChrom Elite HPLC analysis on a Chiralpak IC column (20% isopropanol in hexane, 1.5 mL/min) with retention time 12.49 min (minor) and 14.22 min (major).  $^1\text{H}$  NMR (500 MHz,  $\text{CDCl}_3$ )  $\delta$  7.60 (d,  $J = 8.3$  Hz, 2H), 7.34 (d,  $J = 8.2$  Hz, 2H), 3.81 (q,  $J = 9.1$  Hz, 1H), 3.3–3.23 (m, 1H), 2.30–2.22 (m, 2H), 2.19–2.13 (m, 2H), 2.08 (s, 3H).  $^{13}\text{C}$  NMR (126 MHz,  $\text{CDCl}_3$ )  $\delta$  208.3, 149.3, 132.4, 127.5, 119.1, 110.3, 53.6, 41.6,

27.7, 24.3, 22.0. HRMS (ESI-TOF) Calcd for  $C_{13}H_{14}NO^+$   $[M+H]^+$ : 200.1075; found: 200.1069.

The absolute stereochemistry was assigned by analogy to compound **7a** and **7b**.

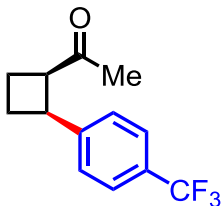

**3e**

### 1-((1R,2S)-2-(4-(trifluoromethyl)phenyl)cyclobutyl)ethan-1-one (**3e**)

Colorless oil (17.2 mg, 71% yield, 94:6 er).  $[\alpha]_D^{20} = -124.5$  ( $c = 1.0$ ,  $CHCl_3$ ). The er ratio was determined by a Hitachi LaChrom Elite HPLC analysis on a Chiralpak OD-H column (2% isopropanol in  $CO_2$ , 0.5 mL/min) with retention time 11.87 min (major) and 17.77 min (minor).  $^1H$  NMR (500 MHz,  $CDCl_3$ )  $\delta$  7.56 (d,  $J = 7.7$  Hz, 2H), 7.35 (d,  $J = 7.9$  Hz, 2H), 3.78 (q,  $J = 8.4, 7.8$  Hz, 1H), 3.33–3.25 (m, 1H), 2.28–2.14 (m, 4H), 2.07 (s, 3H).  $^{13}C$  NMR (126 MHz,  $CDCl_3$ )  $\delta$  208.4, 147.9, 129.0, 128.7, 127.3, 127.1, 125.6, 125.5, 123.3, 53.7, 41.8, 27.9, 24.6, 21.7. HRMS (ESI-TOF) Calcd for  $C_{13}H_{14}F_3O^+$   $[M+H]^+$ : 243.0997; found: 243.0990.

The absolute stereochemistry was assigned by analogy to compound **7a** and **7b**.

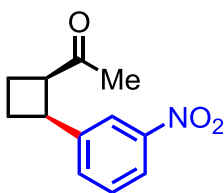

**3f**

### 1-((1R,2S)-2-(3-nitrophenyl)cyclobutyl)ethan-1-one (**3f**)

Colorless oil (16.4 mg, 75% yield, 97:3 er).  $[\alpha]_D^{20} = +39.6$  ( $c = 1.0$ ,  $CHCl_3$ ). The er ratio was determined by a Hitachi LaChrom Elite HPLC analysis on a Chiralpak IC column (20% isopropanol in hexane, 1.0 mL/min) with retention time 17.37 min (major) and 22.86 min (minor).  $^1H$  NMR (500 MHz,  $CDCl_3$ )  $\delta$  8.12–8.03 (m, 2H), 7.61–7.55 (m, 1H), 7.47 (t,  $J =$

7.9 Hz, 1H), 3.86 (q,  $J = 9.4$  Hz, 1H), 3.39–3.27 (m, 1H), 2.34–2.27 (m, 2H), 2.22–2.14 (m, 2H), 2.10 (s, 3H).  $^{13}\text{C}$  NMR (126 MHz,  $\text{CDCl}_3$ )  $\delta$  208.2, 148.6, 146.0, 133.3, 129.5, 121.6, 121.5, 53.6, 41.1, 27.7, 24.5, 22.0. HRMS (ESI-TOF) Calcd for  $\text{C}_{12}\text{H}_{14}\text{NO}_3^+$   $[\text{M}+\text{H}]^+$ : 220.0974; found: 220.0969.

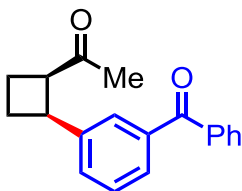

**3g**

**1-((1R,2S)-2-(3-benzoylphenyl)cyclobutyl)ethan-1-one (3g)**

Colorless oil (16.9 mg, 61% yield, 97:3 er).  $[\alpha]_{\text{D}}^{20} = +9.1$  ( $c = 1.0$ ,  $\text{CHCl}_3$ ). The er ratio was determined by a Hitachi LaChrom Elite HPLC analysis on a Chiralpak IC column (20% isopropanol in hexane, 1.5 mL/min) with retention time 14.87 min (major) and 16.89 min (minor).  $^1\text{H}$  NMR (500 MHz,  $\text{CDCl}_3$ )  $\delta$  7.82–7.79 (m, 2H), 7.72 (t,  $J = 1.8$  Hz, 1H), 7.60 (ddt,  $J = 8.8, 6.9, 1.4$  Hz, 2H), 7.51–7.46 (m, 3H), 7.41 (t,  $J = 7.6$  Hz, 1H), 3.77 (q,  $J = 9.2$  Hz, 1H), 2.31–2.23 (m, 1H), 3.38–3.30 (m, 1H), 2.21–2.14 (m, 3H), 2.06 (s, 3H). HRMS (ESI-TOF) Calcd for  $\text{C}_{19}\text{H}_{19}\text{O}_2^+$   $[\text{M}+\text{H}]^+$ : 279.1385; found: 279.1379.

The absolute stereochemistry was assigned by analogy to compound **7a** and **7b**.

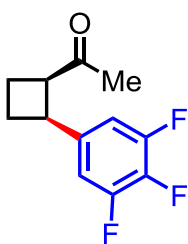

**3h**

**1-((1R,2S)-2-(3,4,5-trifluorophenyl)cyclobutyl)ethan-1-one (3h)**

Colorless oil (16.8 mg, 74% yield, 97:3 er).  $[\alpha]_{\text{D}}^{20} = +11.9$  ( $c = 1.0$ ,  $\text{CHCl}_3$ ). The er ratio was determined by a Hitachi LaChrom Elite HPLC analysis on a Chiralpak IC column (10% isopropanol in hexane, 0.5 mL/min) with retention time 11.75 min (major) and 12.24 min (minor).  $^1\text{H}$  NMR (500 MHz,  $\text{CDCl}_3$ )  $\delta$  6.84 (ddd,  $J = 8.7, 6.5, 0.8$  Hz, 2H), 3.71–3.65 (m,

1H), 3.22–3.15 (m, 1H), 2.26–2.18 (m, 2H), 2.13–2.03 (m, 5H). <sup>13</sup>C NMR (126 MHz, CDCl<sub>3</sub>) δ 208.2, 152.3 (dd, *J* = 10.4, 4.4 Hz), 150.3 (dd, *J* = 10.1, 4.4 Hz), 140.3, 139.4, 137.4, 110.7 (dd, *J* = 16.0, 4.8 Hz), 53.8, 40.9, 27.7, 24.4, 21.8. HRMS (ESI-TOF) Calcd for C<sub>12</sub>H<sub>12</sub>F<sub>3</sub>O<sup>+</sup> [M+H]<sup>+</sup>: 229.0840; found: 229.0833.

The absolute stereochemistry was assigned by analogy to compound **7a** and **7b**.

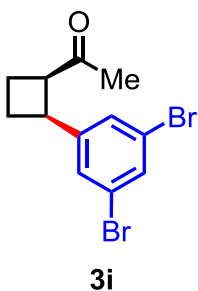

### 1-((1*R*,2*S*)-2-(3,5-dibromophenyl)cyclobutyl)ethan-1-one (**3i**)

Colorless oil (26.9 mg, 82% yield, 99:1 er). [ $\alpha$ ]<sub>D</sub><sup>20</sup> = +17.0 (*c* = 1.0, CHCl<sub>3</sub>). The er ratio was determined by a Hitachi LaChrom Elite HPLC analysis on a Chiralpak IC column (20% isopropanol in hexane, 0.5 mL/min) with retention time 10.87 min (major) and 11.43 min (minor). <sup>1</sup>H NMR (500 MHz, CDCl<sub>3</sub>) δ 7.50 (t, *J* = 1.8 Hz, 1H), 7.30 (dd, *J* = 1.8, 0.7 Hz, 2H), 3.74–3.66 (m, 1H), 3.28–3.21 (m, 1H), 2.26–2.17 (m, 2H), 2.14–2.06 (m, 5H). <sup>13</sup>C NMR (126 MHz, CDCl<sub>3</sub>) δ 208.1, 147.9, 132.1, 128.8, 123.1, 53.5, 40.9, 27.8, 24.5, 21.9. HRMS (ESI-TOF) Calcd for C<sub>12</sub>H<sub>13</sub>Br<sub>2</sub>O<sup>+</sup> [M+H]<sup>+</sup>: 330.9333; found: 330.9323.

The absolute stereochemistry was assigned by analogy to compound **7a** and **7b**.

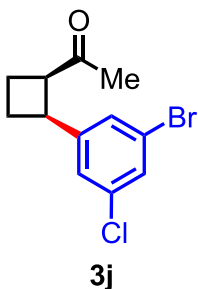

### 1-((1*R*,2*S*)-2-(3-bromo-5-chlorophenyl)cyclobutyl)ethan-1-one (**3j**)

Colorless oil (17.7 mg, 62% yield, 97:3 er). [ $\alpha$ ]<sub>D</sub><sup>20</sup> = +12.5 (*c* = 1.0, CHCl<sub>3</sub>). The er ratio was determined by SFC analysis on a Chiralpak IC column (5% isopropanol in CO<sub>2</sub>, 2.0



mL/min) with retention time 5.98 min (major) and 6.50 min (minor).  $^1\text{H}$  NMR (500 MHz,  $\text{CDCl}_3$ )  $\delta$  7.35 (t,  $J = 1.8$  Hz, 1H), 7.26–7.25 (m, 1H), 7.15–7.14 (m, 1H), 3.73–3.66 (m, 1H), 3.28–3.22 (m, 1H), 2.26–2.19 (m, 2H), 2.13–2.06 (m, 5H).  $^{13}\text{C}$  NMR (126 MHz,  $\text{CDCl}_3$ )  $\delta$  208.2, 147.6, 135.2, 129.5, 128.3, 125.9, 122.9, 53.5, 41.0, 27.8, 24.5, 21.9. HRMS (ESI-TOF) Calcd for  $\text{C}_{12}\text{H}_{13}\text{BrClO}^+$   $[\text{M}+\text{H}]^+$ : 286.9838; found: 286.9830.

The absolute stereochemistry was assigned by analogy to compound **7a** and **7b**.

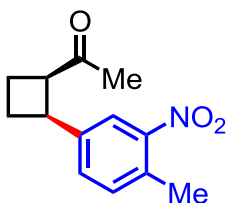

**3k**

**1-((1R,2S)-2-(4-methyl-3-nitrophenyl)cyclobutyl)ethan-1-one (3k)**

Colorless oil (9.3 mg, 40% yield, 93:7 er).  $[\alpha]_{\text{D}}^{20} = +25.7$  ( $c = 1.0$ ,  $\text{CHCl}_3$ ). The er ratio was determined by a Hitachi LaChrom Elite HPLC analysis on a Chiralpak IC column (20% isopropanol in hexane, 1.5 mL/min) with retention time 10.50 min (major) and 11.74 min (minor).  $^1\text{H}$  NMR (500 MHz,  $\text{CDCl}_3$ )  $\delta$  7.64 (dd,  $J = 1.8, 0.9$  Hz, 1H), 7.40–7.36 (m, 1H), 7.33 (d,  $J = 8.0$  Hz, 1H), 4.14 (q,  $J = 9.3$  Hz, 1H), 3.51–3.38 (m, 1H), 2.42–2.36 (m, 4H), 2.21–2.15 (m, 2H), 2.12 (s, 3H), 1.90 (dtd,  $J = 10.8, 9.9, 9.0$  Hz, 1H).  $^{13}\text{C}$  NMR (126 MHz,  $\text{CDCl}_3$ )  $\delta$  208.4, 137.8, 135.1, 133.8, 128.2, 124.9, 51.6, 38.5, 27.7, 25.8, 21.6, 20.8. HRMS (ESI-TOF) Calcd for  $\text{C}_{13}\text{H}_{16}\text{NO}_3^+$   $[\text{M}+\text{H}]^+$ : 234.1130; found: 234.1127.

The absolute stereochemistry was assigned by analogy to compound **7a** and **7b**.

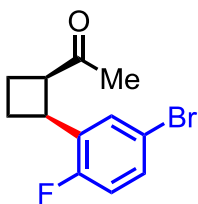

**3l**

**1-((1R,2S)-2-(5-bromo-2-fluorophenyl)cyclobutyl)ethan-1-one (3l)**

Colorless oil (20.0 mg, 74% yield, 99:1 er).  $[\alpha]_{\text{D}}^{20} = +20.7$  ( $c = 1.0$ ,  $\text{CHCl}_3$ ). The er ratio was determined by SFC analysis on a Chiralpak AS column (10% isopropanol in  $\text{CO}_2$ , 2.0

mL/min) with retention time 4.58 min (major) and 5.63 min (minor). <sup>1</sup>H NMR (400 MHz, CDCl<sub>3</sub>) δ 7.36 (ddd, *J* = 6.6, 2.5, 0.8 Hz, 1H), 7.30 (dddd, *J* = 8.7, 4.5, 2.5, 0.4 Hz, 1H), 6.89 (dd, *J* = 9.9, 8.7 Hz, 1H), 3.90–3.81 (m, 1H), 3.39 (q, *J* = 8.8, 8.4 Hz, 1H), 2.30–2.12 (m, 4H), 2.09 (s, 3H). <sup>13</sup>C NMR (126 MHz, CDCl<sub>3</sub>) δ 208.2, 161.0, 159.0, 132.9, 132.7, 131.3, 131.2, 131.02, 130.95, 117.5, 117.3, 116.82, 116.79, 52.1, 36.3, 28.0, 24.4, 21.8. HRMS (ESI-TOF) Calcd for C<sub>12</sub>H<sub>13</sub>BrFO<sup>+</sup> [M+H]<sup>+</sup>: 271.0134; found: 271.0127.

The absolute stereochemistry was assigned by analogy to compound **7a** and **7b**.

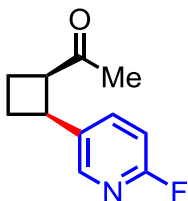

**3m**

### 1-((1R,2S)-2-(6-fluoropyridin-3-yl)cyclobutyl)ethan-1-one (**3m**)

Colorless oil (7.1 mg, 37% yield, 94:6 er). [ $\alpha$ ]<sub>D</sub><sup>20</sup> = +9.4 (*c* = 1.0, CHCl<sub>3</sub>). The er ratio was determined by SFC analysis on a Chiralpak IC column (10% isopropanol in CO<sub>2</sub>, 2.0 mL/min) with retention time 6.95 min (major) and 7.56 min (minor). <sup>1</sup>H NMR (500 MHz, CDCl<sub>3</sub>) δ 8.10–8.06 (m, 1H), 7.72–7.65 (m, 1H), 6.88 (dd, *J* = 8.4, 2.9 Hz, 1H), 3.75 (q, *J* = 8.8, 8.3 Hz, 1H), 3.29–3.21 (m, 1H), 2.29–2.23 (m, 2H), 2.19–2.12 (m, 2H), 2.08 (s, 3H). <sup>13</sup>C NMR (126 MHz, CDCl<sub>3</sub>) δ 208.2, 163.6, 161.7, 145.9, 145.8, 139.8, 139.7, 136.8, 136.7, 109.5, 109.2, 53.8, 38.6, 27.7, 24.5, 22.1. HRMS (ESI-TOF) Calcd for C<sub>11</sub>H<sub>13</sub>FNO<sup>+</sup> [M+H]<sup>+</sup>: 194.0981; found: 194.0977.

The absolute stereochemistry was assigned by analogy to compound **7a** and **7b**.

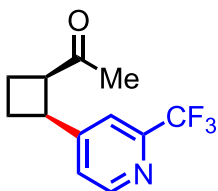

**3n**

### 1-((1R,2S)-2-(2-(trifluoromethyl)pyridin-4-yl)cyclobutyl)ethan-1-one (**3n**)

Colorless oil (10.2 mg, 42% yield, 92:8 er).  $[\alpha]_D^{20} = -25.3$  ( $c = 1.0$ ,  $\text{CHCl}_3$ ). The er ratio was determined by SFC analysis on a Chiralpak IC column (10% isopropanol in  $\text{CO}_2$ , 2.0 mL/min) with retention time 6.42 min (minor) and 7.62 min (major).  $^1\text{H}$  NMR (500 MHz,  $\text{CDCl}_3$ )  $\delta$  8.63 (d,  $J = 5.0$  Hz, 1H), 7.56–7.50 (m, 1H), 7.34 (dt,  $J = 5.0, 1.1$  Hz, 1H), 3.88 (q,  $J = 9.6$  Hz, 1H), 3.35–3.25 (m, 1H), 2.37–2.29 (m, 2H), 2.23–2.16 (m, 2H), 2.12 (s, 3H).  $^{13}\text{C}$  NMR (126 MHz,  $\text{CDCl}_3$ )  $\delta$  207.9, 154.8, 150.2, 148.7, 148.5, 124.8, 122.8, 120.6, 118.77, 118.75, 53.0, 40.2, 27.5, 23.6, 22.5. HRMS (ESI-TOF) Calcd for  $\text{C}_{12}\text{H}_{13}\text{F}_3\text{NO}^+$   $[\text{M}+\text{H}]^+$ : 244.0949; found: 244.0944.

The absolute stereochemistry was assigned by analogy to compound **7a** and **7b**.

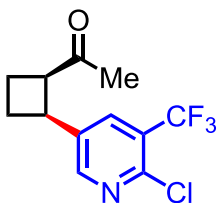

**3o**

**1-((1R,2S)-2-(6-chloro-5-(trifluoromethyl)pyridin-3-yl)cyclobutyl)ethan-1-one (3o)**

Colorless oil (14.0 mg, 50% yield, 88:12 er).  $[\alpha]_D^{20} = -11.3$  ( $c = 1.0$ ,  $\text{CHCl}_3$ ). The er ratio was determined by SFC analysis on a Chiralpak IC column (5% isopropanol in  $\text{CO}_2$ , 2.0 mL/min) with retention time 5.36 min (major) and 5.75 min (minor).  $^1\text{H}$  NMR (500 MHz,  $\text{CDCl}_3$ )  $\delta$  8.43 (dd,  $J = 1.8, 0.7$  Hz, 1H), 7.91–7.84 (m, 1H), 3.90–3.82 (m, 1H), 3.32–3.23 (m, 1H), 2.38–2.29 (m, 2H), 2.21–2.15 (m, 2H), 2.11 (s, 3H).  $^{13}\text{C}$  NMR (126 MHz,  $\text{CDCl}_3$ )  $\delta$  207.8, 150.9, 146.8, 138.3, 135.22, 135.18, 125.2, 125.0, 123.4, 121.2, 53.5, 37.8, 27.5, 23.9, 22.7. HRMS (ESI-TOF) Calcd for  $\text{C}_{12}\text{H}_{12}\text{ClF}_3\text{NO}^+$   $[\text{M}+\text{H}]^+$ : 278.0560; found: 278.0554.

The absolute stereochemistry was assigned by analogy to compound **7a** and **7b**.

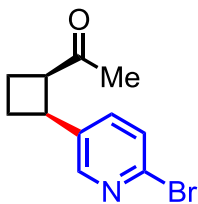

**3p**

**1-((1R,2S)-2-(6-bromopyridin-3-yl)cyclobutyl)ethan-1-one (3p)**

Colorless oil (8.8 mg, 35% yield, 95:5 er).  $[\alpha]_D^{20} = +11.3$  ( $c = 1.0$ ,  $\text{CHCl}_3$ ). The er ratio was determined by SFC analysis on a Chiralpak IC column (10% isopropanol in  $\text{CO}_2$ , 2.0 mL/min) with retention time 16.33 min (major) and 17.16 min (minor).  $^1\text{H}$  NMR (500 MHz,  $\text{CDCl}_3$ )  $\delta$  8.26–8.21 (m, 1H), 7.46–7.40 (m, 2H), 3.72 (q,  $J = 8.8, 8.1$  Hz, 1H), 3.24 (q,  $J = 9.2, 8.8$  Hz, 1H), 2.31–2.23 (m, 2H), 2.20–2.12 (m, 2H), 2.07 (s, 3H).  $^{13}\text{C}$  NMR (126 MHz,  $\text{CDCl}_3$ )  $\delta$  208.1, 148.8, 140.1, 138.4, 137.3, 128.0, 53.6, 38.7, 27.7, 24.2, 22.2. HRMS (ESI-TOF) Calcd for  $\text{C}_{11}\text{H}_{13}\text{BrNO}^+$   $[\text{M}+\text{H}]^+$ : 254.0181 found: 254.0177.

The absolute stereochemistry was assigned by analogy to compound **7a** and **7b**.

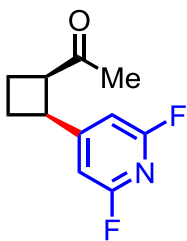

**3q**

**1-((1R,2S)-2-(2,6-difluoropyridin-4-yl)cyclobutyl)ethan-1-one (3q)**

Colorless oil (13.0 mg, 62% yield, 95:5 er).  $[\alpha]_D^{20} = +9.8$  ( $c = 1.0$ ,  $\text{CHCl}_3$ ). The er ratio was determined by SFC analysis on a Chiralpak IC column (3% isopropanol in  $\text{CO}_2$ , 2.0 mL/min) with retention time 7.97 min (minor) and 8.43 min (major).  $^1\text{H}$  NMR (500 MHz,  $\text{CDCl}_3$ )  $\delta$  6.66 (s, 2H), 3.89–3.81 (m, 1H), 3.31–3.23 (m, 1H), 2.37–2.24 (m, 2H), 2.20–2.09 (m, 5H).  $^{13}\text{C}$  NMR (126 MHz,  $\text{CDCl}_3$ )  $\delta$  207.7, 163.6, 163.54, 163.48, 163.2, 163.0, 161.2, 161.1, 104.3, 104.2, 104.0, 103.9, 53.0, 40.1, 27.5, 23.6, 22.5. HRMS (ESI-TOF) Calcd for  $\text{C}_{11}\text{H}_{12}\text{F}_2\text{NO}^+$   $[\text{M}+\text{H}]^+$ : 212.0887; found: 212.0883.

The absolute stereochemistry was assigned by analogy to compound **7a** and **7b**.

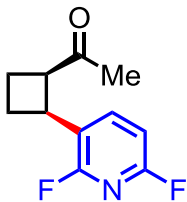

**3r**

**1-((1R,2S)-2-(2,6-difluoropyridin-3-yl)cyclobutyl)ethan-1-one (3r)**

Colorless oil (11.6 mg, 55% yield, 92:8 er).  $[\alpha]_D^{20} = -103.0$  ( $c = 1.0$ ,  $\text{CHCl}_3$ ). The er ratio was determined by SFC analysis on a Chiralpak IC column (5% isopropanol in  $\text{CO}_2$ , 2.0 mL/min) with retention time 6.0 min (major) and 6.70 min (minor).  $^1\text{H}$  NMR (400 MHz,  $\text{CDCl}_3$ )  $\delta$  7.74 (dddd,  $J = 9.5, 8.2, 7.6, 0.8$  Hz, 1H), 6.79 (dd,  $J = 8.1, 2.9$  Hz, 1H), 3.82 (q,  $J = 9.1$  Hz, 1H), 3.40 (q,  $J = 9.4$  Hz, 1H), 2.34–2.24 (m, 2H), 2.21–2.13 (m, 2H), 2.11 (s, 3H).  $^{13}\text{C}$  NMR (101 MHz,  $\text{CDCl}_3$ )  $\delta$  208.1, 143.4, 143.31, 143.29, 143.2, 122.0, 121.9, 121.7, 121.6, 106.3, 106.2, 105.94, 105.88, 51.8, 35.5, 27.9, 24.2, 22.3. HRMS (ESI-TOF) Calcd for  $\text{C}_{11}\text{H}_{12}\text{F}_2\text{NO}^+$   $[\text{M}+\text{H}]^+$ : 212.0887; found: 212.0883.

The absolute stereochemistry was assigned by analogy to compound **7a** and **7b**.

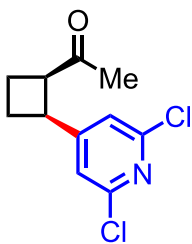

**3s**

**1-((1R,2S)-2-(2,6-dichloropyridin-4-yl)cyclobutyl)ethan-1-one (3s)**

Colorless oil (11.9 mg, 49% yield, 96:4 er).  $[\alpha]_D^{20} = +13.8$  ( $c = 1.0$ ,  $\text{CHCl}_3$ ). The er ratio was determined by SFC analysis on a Chiralpak IC column (5% isopropanol in  $\text{CO}_2$ , 2.0 mL/min) with retention time 13.08 min (minor) and 15.49 min (major).  $^1\text{H}$  NMR (500 MHz,  $\text{CDCl}_3$ )  $\delta$  7.11 (s, 2H), 3.83–3.74 (m, 1H), 3.30–3.21 (m, 1H), 2.37–2.29 (m, 1H), 2.28–2.22 (m, 1H), 2.18–2.08 (m, 5H).  $^{13}\text{C}$  NMR (126 MHz,  $\text{CDCl}_3$ )  $\delta$  207.6, 158.8, 150.8, 121.2,

52.9, 39.5, 27.4, 23.4, 22.6. HRMS (ESI-TOF) Calcd for  $C_{11}H_{12}Cl_2NO^+$   $[M+H]^+$ : 244.0296; found: 244.0291.

The absolute stereochemistry was assigned by analogy to compound **7a** and **7b**.

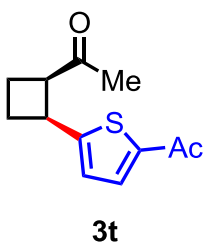

### 1-(5-((1*S*,2*R*)-2-acetylcyclobutyl)thiophen-2-yl)ethan-1-one (**3t**)

Colorless oil (11.1 mg, 50% yield, 90:10 er).  $[\alpha]_D^{20} = +20.3$  ( $c = 1.0$ ,  $CHCl_3$ ). The er ratio was determined by SFC analysis on a Chiralpak IC column (20% isopropanol in  $CO_2$ , 2.0 mL/min) with retention time 8.85 min (major) and 15.15 min (minor).  $^1H$  NMR (500 MHz,  $CDCl_3$ )  $\delta$  7.54 (d,  $J = 3.8$  Hz, 1H), 6.88 (d,  $J = 3.8$  Hz, 1H), 3.89 (q,  $J = 9.1$  Hz, 1H), 3.38–3.26 (m, 1H), 2.52 (s, 3H), 2.37–2.31 (m, 1H), 2.22–2.13 (m, 3H), 2.08 (s, 3H).  $^{13}C$  NMR (126 MHz,  $CDCl_3$ )  $\delta$  207.6, 190.6, 157.8, 142.5, 133.0, 124.9, 55.2, 38.2, 28.0, 26.8, 26.6, 21.3. HRMS (ESI-TOF) Calcd for  $C_{12}H_{15}O_2S^+$   $[M+H]^+$ : 223.0793; found: 223.0791.

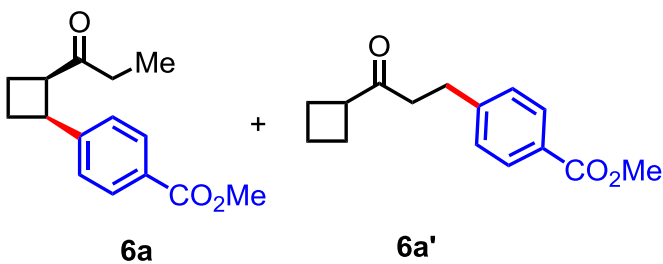

### methyl 4-((1*S*,2*R*)-2-propionylcyclobutyl)benzoate (**6a**)

### methyl 4-(3-cyclobutyl-3-oxopropyl)benzoate (**6a'**)

Colorless oil as a 4:1 mixture of **6a** and **6a'** isomers (12.5 mg, 51% yield) **6a**: 96:4 er,  $[\alpha]_D^{20} = +13.9$  ( $c = 1.0$ ,  $CHCl_3$ ). The er ratio of **6a** was determined by SFC analysis on a Chiralpak IC column (5% isopropanol in  $CO_2$ , 2.0 mL/min) with retention time 15.04 min (major) and 18.71 min (minor). **6a**:  $^1H$  NMR (500 MHz,  $CDCl_3$ )  $\delta$  7.98 (d,  $J = 8.5$  Hz, 2H), 7.30 (d,  $J = 8.0$  Hz, 2H), 3.90 (s, 3H), 3.81–3.76 (m, 1H), 3.35–3.28 (m, 1H), 2.40–2.26 (m,

3H), 2.21–2.15 (m, 3H), 1.03 (t,  $J = 7.3$  Hz, 3H).  $^{13}\text{C}$  NMR (126 MHz,  $\text{CDCl}_3$ )  $\delta$  211.1, 167.1, 149.3, 129.9, 128.5, 126.8, 52.7, 52.2, 42.2, 34.0, 24.8, 21.7, 7.7. HRMS (ESI-TOF) Calcd for  $\text{C}_{15}\text{H}_{19}\text{O}_3^+$   $[\text{M}+\text{H}]^+$ : 247.1334; found: 247.1331. **6a'**:  $^1\text{H}$  NMR (500 MHz,  $\text{CDCl}_3$ )  $\delta$  7.96–7.93 (m, 0.50 H), 7.26–7.24 (m, 0.56H), 3.22 (pd,  $J = 8.6, 1.1$  Hz, 0.25H), 2.95 (t,  $J = 7.5$  Hz, 0.50H), 2.68 (t,  $J = 7.9, 7.1$  Hz, 0.50H), 2.14–2.06 (m, 1H), 1.99–1.91 (m, 0.27H), 1.83–1.76 (m, 0.26H).  $^{13}\text{C}$  NMR (126 MHz,  $\text{CDCl}_3$ )  $\delta$  210.4, 171.5, 147.0, 128.4, 128.2, 127.7, 45.6, 39.5, 29.7, 23.9, 18.6, 7.7.

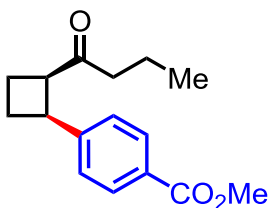

**6b**

**methyl 4-((1*S*,2*R*)-2-butylcyclobutyl)benzoate (6b)**

Colorless oil (16.1 mg, 62% yield, 98:2 er).  $[\alpha]_{\text{D}}^{20} = -68.4$  ( $c = 1.0$ ,  $\text{CHCl}_3$ ). The er ratio was determined by a Hitachi LaChrom Elite HPLC analysis on a Chiralpak IC column (20% isopropanol in hexane, 1.5 mL/min) with retention time 6.56 min (major) and 10.0 min (minor).  $^1\text{H}$  NMR (500 MHz,  $\text{CDCl}_3$ )  $\delta$  7.98 (d,  $J = 8.3$  Hz, 2H), 7.30 (d,  $J = 7.9$  Hz, 2H), 3.91 (s, 3H), 3.81–3.76 (m, 1H), 3.34–3.28 (m, 1H), 2.36–2.24 (m, 3H), 2.20–2.13 (m, 3H), 1.60–1.49 (m, 2H), 0.87 (t,  $J = 7.4$  Hz, 3H).  $^{13}\text{C}$  NMR (126 MHz,  $\text{CDCl}_3$ )  $\delta$  210.7, 167.1, 149.3, 129.9, 128.4, 126.8, 53.0, 52.2, 42.8, 42.1, 24.8, 21.7, 17.1, 13.9. HRMS (ESI-TOF) Calcd for  $\text{C}_{16}\text{H}_{21}\text{O}_3^+$   $[\text{M}+\text{H}]^+$ : 261.1491; found: 261.1488.

The absolute stereochemistry was assigned by analogy to compound **7a** and **7b**.

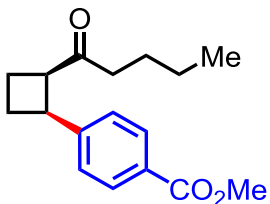

**6c**

**methyl 4-((1*S*,2*R*)-2-pentanoylcyclobutyl)benzoate (6c)**

Colorless oil (15.0 mg, 55% yield, 97:3 er).  $[\alpha]_D^{20} = -133.0$  ( $c = 1.0$ ,  $\text{CHCl}_3$ ). The er ratio was determined by a Hitachi LaChrom Elite HPLC analysis on a Chiralpak IC column (20% isopropanol in hexane, 1.5 mL/min) with retention time 6.12 min (major) and 9.42 min (minor).  $^1\text{H}$  NMR (500 MHz,  $\text{CDCl}_3$ )  $\delta$  7.98 (d,  $J = 8.4$  Hz, 2H), 7.30 (d,  $J = 8.0$  Hz, 2H), 3.91 (s, 3H), 3.78 (q,  $J = 9.1$  Hz, 1H), 3.34–3.27 (m, 1H), 2.33–2.26 (m, 3H), 2.19–2.13 (m, 3H), 1.55–1.48 (m, 2H), 1.32–1.20 (m, 2H), 0.86 (t,  $J = 7.3$  Hz, 3H).  $^{13}\text{C}$  NMR (126 MHz,  $\text{CDCl}_3$ )  $\delta$  210.8, 167.1, 149.3, 130.0, 128.4, 126.8, 53.0, 52.2, 42.1, 40.6, 25.8, 24.8, 22.5, 21.7, 14.0. HRMS (ESI-TOF) Calcd for  $\text{C}_{17}\text{H}_{23}\text{O}_3^+$   $[\text{M}+\text{H}]^+$ : 275.1647; found: 275.1646.

The absolute stereochemistry was assigned by analogy to compound **7a** and **7b**.

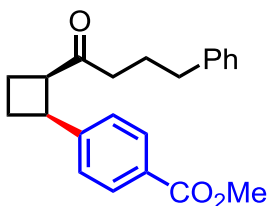

**6d**

**methyl 4-((1S,2R)-2-(4-phenylbutanoyl)cyclobutyl)benzoate (6d)**

Colorless oil (15.8 mg, 47% yield, 98:2 er).  $[\alpha]_D^{20} = +9.7$  ( $c = 1.0$ ,  $\text{CHCl}_3$ ). The er ratio was determined by a Hitachi LaChrom Elite HPLC analysis on a Chiralpak IC column (20% isopropanol in hexane, 1.5 mL/min) with retention time 9.05 min (major) and 12.90 min (minor).  $^1\text{H}$  NMR (500 MHz,  $\text{CDCl}_3$ )  $\delta$  7.96 (d,  $J = 8.4$  Hz, 2H), 7.28–7.25 (m, 4H), 7.20–7.17 (m, 1H), 7.11 (dd,  $J = 7.9, 1.1$  Hz, 2H), 3.91 (s, 3H), 3.78–3.71 (m, 1H), 3.30–3.24 (m, 1H), 2.58 (dd,  $J = 8.3, 6.8$  Hz, 2H), 2.35–2.22 (m, 3H), 2.19–2.10 (m, 3H), 1.91–1.83 (m, 2H).  $^{13}\text{C}$  NMR (126 MHz,  $\text{CDCl}_3$ )  $\delta$  149.2, 141.6, 130.0, 128.6, 128.5, 126.8, 126.1, 53.0, 52.2, 42.2, 40.0, 35.2, 25.0, 24.8, 21.6. HRMS (ESI-TOF) Calcd for  $\text{C}_{22}\text{H}_{25}\text{O}_3^+$   $[\text{M}+\text{H}]^+$ : 337.1804; found: 337.1799.

The absolute stereochemistry was assigned by analogy to compound **7a** and **7b**.



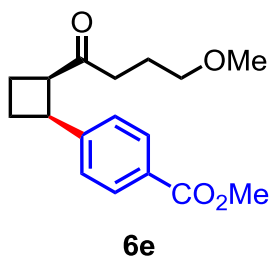

**methyl 4-((1*S*,2*R*)-2-(4-methoxybutanoyl)cyclobutyl)benzoate (6e)**

Colorless oil (10.1 mg, 35% yield, 98:2 er).  $[\alpha]_{\text{D}}^{20} = -140.0$  ( $c = 1.0$ ,  $\text{CHCl}_3$ ). The er ratio was determined by SFC analysis on a Chiralpak AS column (2% isopropanol in  $\text{CO}_2$ , 2.0 mL/min) with retention time 4.92 min (major) and 10.11 min (minor).  $^1\text{H}$  NMR (500 MHz,  $\text{CDCl}_3$ )  $\delta$  7.98 (d,  $J = 8.3$  Hz, 2H), 7.30 (d,  $J = 8.6$  Hz, 2H), 3.91 (s, 3H), 3.82–3.75 (m, 1H), 3.36–3.29 (m, 3H), 3.28 (s, 3H), 2.40 (qt,  $J = 17.5, 7.1$  Hz, 2H), 2.28–2.22 (m, 1H), 2.22–2.12 (m, 3H), 1.83 (p,  $J = 6.5$  Hz, 2H).  $^{13}\text{C}$  NMR (126 MHz,  $\text{CDCl}_3$ )  $\delta$  210.3, 167.2, 149.3, 129.9, 128.4, 126.8, 71.8, 58.6, 53.0, 52.2, 42.0, 37.3, 24.8, 23.6, 21.8. HRMS (ESI-TOF) Calcd for  $\text{C}_{17}\text{H}_{23}\text{O}_4^+$   $[\text{M}+\text{H}]^+$ : 291.1596; found: 291.1589.

The absolute stereochemistry was assigned by analogy to compound **7a** and **7b**.

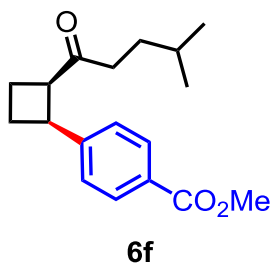

**methyl 4-((1*S*,2*R*)-2-(4-methylpentanoyl)cyclobutyl)benzoate (6g)**

Colorless oil (13.8 mg, 51% yield, 97:3 er).  $[\alpha]_{\text{D}}^{20} = -93.3$  ( $c = 1.0$ ,  $\text{CHCl}_3$ ). The er ratio was determined by SFC analysis on a Chiralpak IC column (10% isopropanol in  $\text{CO}_2$ , 2.0 mL/min) with retention time 5.99 min (major) and 7.38 min (minor).  $^1\text{H}$  NMR (500 MHz,  $\text{CDCl}_3$ )  $\delta$  7.98 (d,  $J = 8.3$  Hz, 2H), 7.30 (d,  $J = 8.2$  Hz, 2H), 3.91 (s, 3H), 3.78 (q,  $J = 8.2, 7.3$  Hz, 1H), 3.36–3.28 (m, 1H), 2.36–2.22 (m, 3H), 2.21–2.12 (m, 3H), 1.46–1.41 (m, 3H), 0.84 (dd,  $J = 6.4, 2.7$  Hz, 6H).  $^{13}\text{C}$  NMR (126 MHz,  $\text{CDCl}_3$ )  $\delta$  211.0, 167.2, 149.3, 130.0,

128.4, 126.8, 53.0, 52.2, 42.2, 38.9, 32.5, 27.8, 24.8, 22.5, 22.4, 21.8. HRMS (ESI-TOF) Calcd for C<sub>18</sub>H<sub>25</sub>O<sub>3</sub><sup>+</sup> [M+H]<sup>+</sup>: 273.1491; found: 273.1488.

The absolute stereochemistry was assigned by analogy to compound **7a** and **7b**.

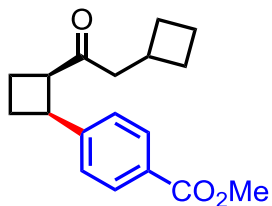

**6g**

**methyl 4-((1S,2R)-2-(2-cyclobutylacetyl)cyclobutyl)benzoate (6g)**

Colorless oil (11.4 mg, 40% yield, 97:3 er).  $[\alpha]_D^{20} = -70.0$  ( $c = 1.0$ , CHCl<sub>3</sub>). The er ratio was determined by SFC analysis on a Chiralpak IC column (10% isopropanol in CO<sub>2</sub>, 2.0 mL/min) with retention time 8.58 min (major) and 9.82 min (minor). <sup>1</sup>H NMR (500 MHz, CDCl<sub>3</sub>)  $\delta$  7.98 (d,  $J = 8.3$  Hz, 2H), 7.29 (d,  $J = 8.0$  Hz, 2H), 3.91 (s, 3H), 3.76 (q,  $J = 8.6$  Hz, 1H), 3.29–3.23 (m, 1H), 2.65 (p,  $J = 7.8$  Hz, 1H), 2.42 (dd,  $J = 7.4, 4.9$  Hz, 2H), 2.27–2.21 (m, 1H), 2.18–2.07 (m, 5H), 1.89–1.77 (m, 2H), 1.64–1.53 (m, 2H). <sup>13</sup>C NMR (126 MHz, CDCl<sub>3</sub>)  $\delta$  210.1, 167.2, 149.3, 130.0, 128.4, 126.8, 53.0, 52.2, 48.1, 42.0, 31.4, 28.7, 24.7, 21.7, 18.9. HRMS (ESI-TOF) Calcd for C<sub>18</sub>H<sub>23</sub>O<sub>3</sub><sup>+</sup> [M+H]<sup>+</sup>: 287.1647; found: 287.1642.

The absolute stereochemistry was assigned by analogy to compound **7a** and **7b**.

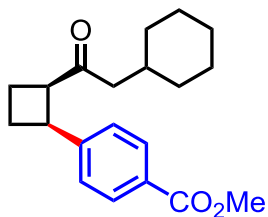

**6h**

**methyl 4-((1S,2R)-2-(2-cyclohexylacetyl)cyclobutyl)benzoate (6h)**

Colorless oil (13.8 mg, 44% yield, 96:4 er).  $[\alpha]_D^{20} = +11.1$  ( $c = 1.0$ , CHCl<sub>3</sub>). The er ratio was determined by SFC analysis on a Chiralpak IC column (10% isopropanol in CO<sub>2</sub>, 2.0 mL/min) with retention time 9.04 min (major) and 10.30 min (minor). <sup>1</sup>H NMR (500 MHz,

CDCl<sub>3</sub>)  $\delta$  7.98 (d,  $J$  = 8.3 Hz, 2H), 7.29 (d,  $J$  = 8.3 Hz, 2H), 3.91 (s, 3H), 3.79–3.73 (m, 1H), 3.31–3.25 (m, 1H), 2.27–2.21 (m, 1H), 2.18–2.13 (m, 4H), 1.83–1.75 (m, 1H), 1.68–1.56 (m, 6H), 1.29–1.18 (m, 2H), 1.14–1.05 (m, 1H), 0.90–0.81 (m, 2H). <sup>13</sup>C NMR (126 MHz, CDCl<sub>3</sub>)  $\delta$  210.5, 167.2, 149.3, 129.9, 128.4, 126.8, 53.4, 52.2, 48.7, 42.1, 33.7, 33.5, 33.4, 26.3, 26.2, 26.2, 24.7, 21.6. HRMS (ESI-TOF) Calcd for C<sub>20</sub>H<sub>27</sub>O<sub>3</sub><sup>+</sup> [M+H]<sup>+</sup>: 315.1960; found: 315.1958.

The absolute stereochemistry was assigned by analogy to compound **7a** and **7b**.

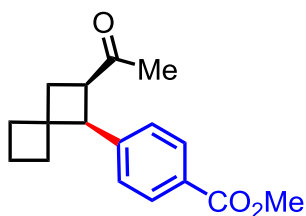

**6i**

**methyl 4-((1R,2R)-2-acetylspiro[3.3]heptan-1-yl)benzoate (6i)**

Colorless oil (17.9 mg, 66% yield, 95:5 er).  $[\alpha]_D^{20} = +17.7$  ( $c = 1.0$ , CHCl<sub>3</sub>). The er ratio was determined by SFC analysis on a Chiralpak OD column (2% isopropanol in CO<sub>2</sub>, 2.0 mL/min) with retention time 8.56 min (major) and 9.67 min (minor). <sup>1</sup>H NMR (500 MHz, CDCl<sub>3</sub>)  $\delta$  8.03 (d,  $J$  = 8.3 Hz, 2H), 7.28 (d,  $J$  = 8.3 Hz, 2H), 3.92 (s, 3H), 3.44–3.33 (m, 2H), 2.24 (d,  $J$  = 8.5 Hz, 2H), 2.03 (s, 3H), 2.01–1.93 (m, 2H), 1.83–1.76 (m, 1H), 1.72–1.68 (m, 2H), 1.54–1.46 (m, 1H). <sup>13</sup>C NMR (126 MHz, CDCl<sub>3</sub>)  $\delta$  208.5, 167.1, 145.2, 129.9, 128.7, 127.8, 52.2, 51.9, 45.5, 45.0, 35.1, 33.7, 29.7, 28.2, 16.1. HRMS (ESI-TOF) Calcd for C<sub>17</sub>H<sub>20</sub>O<sub>3</sub><sup>+</sup>[M+H]<sup>+</sup>: 273.1491; found: 273.1488.

The absolute stereochemistry was assigned by analogy to compound **7a** and **7b**.

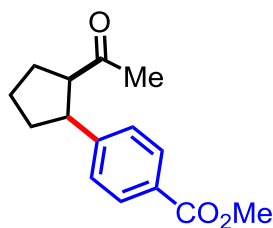

**6j**

**methyl 4-((-2-acetylcyclopentyl)benzoate (6j)**

Colorless oil, Ag<sub>3</sub>PO<sub>4</sub>: 10.3 mg, 42% yield, 70:30 er; [ $\alpha$ ]<sub>D</sub><sup>20</sup> = -2.4 (*c* = 1.0, CHCl<sub>3</sub>). AgTFA: 9.1 mg, 37%, 61:39 er. The er ratios were determined by SFC analysis on a Chiralpak IC column (10% isopropanol in CO<sub>2</sub>, 2.0 mL/min) with retention time 7.74 min (major), 10.99 min (minor) and 7.73 min (major), 10.97 min (minor), respectively. <sup>1</sup>H NMR (500 MHz, CDCl<sub>3</sub>)  $\delta$  7.96 (d, *J* = 8.4 Hz, 2H), 7.30 (d, *J* = 8.0 Hz, 2H), 3.90 (s, 3H), 3.41–3.34 (m, 1H), 3.03 (td, *J* = 9.2, 7.7 Hz, 1H), 2.21–2.10 (m, 2H), 2.02 (s, 3H), 1.95–1.87 (m, 2H), 1.83–1.75 (m, 2H). <sup>13</sup>C NMR (126 MHz, CDCl<sub>3</sub>)  $\delta$  210.1, 167.1, 150.3, 130.1, 128.5, 127.4, 60.4, 52.2, 48.5, 35.7, 30.2, 30.1, 25.5. HRMS (ESI-TOF) Calcd for C<sub>15</sub>H<sub>19</sub>O<sub>3</sub><sup>+</sup> [M+H]<sup>+</sup>: 247.1334; found: 247.1332.

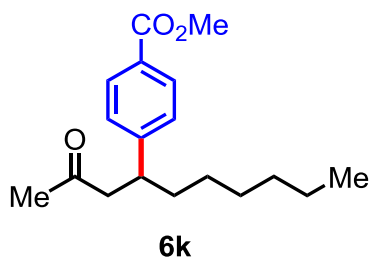

**methyl 4-(2-oxodecan-4-yl)benzoate (6k)**

Colorless oil (9.3 mg, 32% yield, 60:40 er). The er ratio was determined by SFC analysis on a Chiralpak IC column (10% isopropanol in CO<sub>2</sub>, 2.0 mL/min) with retention time 6.15 min (major) and 7.20 min (minor). <sup>1</sup>H NMR (500 MHz, CDCl<sub>3</sub>)  $\delta$  7.96 (d, *J* = 8.3 Hz, 2H), 7.25 (d, *J* = 8.2 Hz, 2H), 3.90 (s, 3H), 3.22–3.15 (m, 1H), 2.73 (d, *J* = 7.1 Hz, 2H), 2.02 (s, 3H), 1.66–1.59 (m, 2H), 1.29–1.12 (m, 8H), 0.83 (t, *J* = 7.0 Hz, 3H). <sup>13</sup>C NMR (126 MHz, CDCl<sub>3</sub>)  $\delta$  207.5, 167.2, 150.4, 130.0, 128.5, 127.7, 52.2, 50.6, 41.3, 36.4, 31.8, 30.8, 29.3, 27.4, 22.7, 14.2. HRMS (ESI-TOF) Calcd for C<sub>18</sub>H<sub>27</sub>O<sub>3</sub><sup>+</sup>[M+H]<sup>+</sup>: 291.1955; found: 291.1952.

## 5. Diverse Chiral Cyclobutanes via Sequential C–H Arylation

### Scheme S2

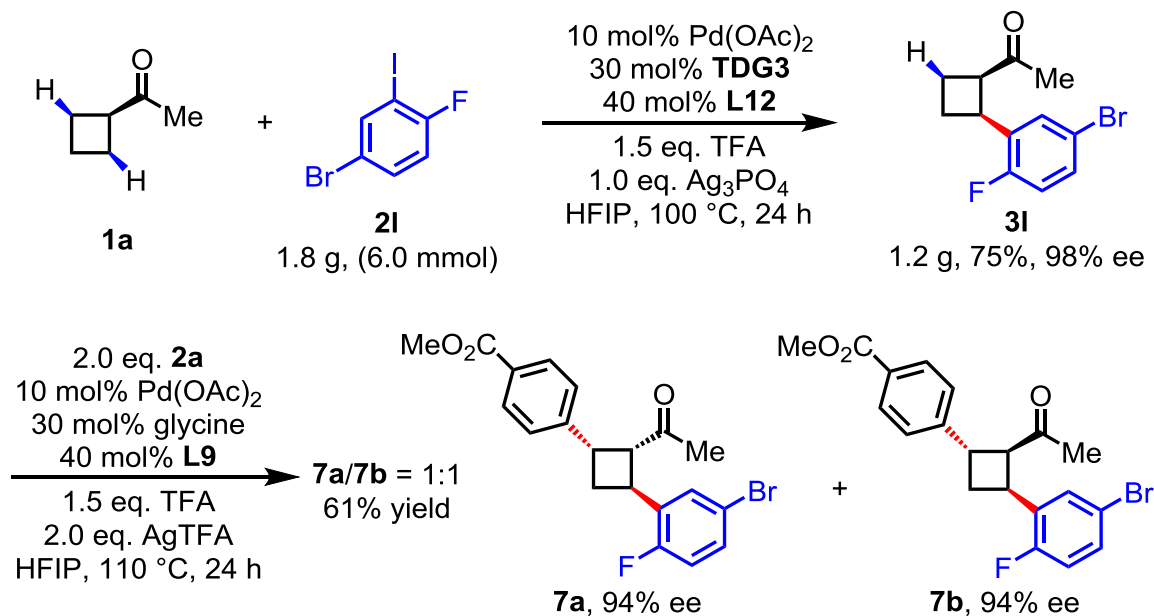

The experiment was performed according to the above-described general procedure.

#### methyl 4-((1*S*,2*S*,3*S*)-2-acetyl-3-(5-bromo-2-fluorophenyl)cyclobutyl)benzoate (**7a**)

White solid (547 mg, 31.5% yield, 97:3 er),  $[\alpha]_{\text{D}}^{20} = -3.8$  ( $c = 1.0$ ,  $\text{CHCl}_3$ ), m.p.: 112–114 °C. The er ratio was determined by SFC analysis on a Chiralpak IC column (10% isopropanol in  $\text{CO}_2$ , 2.0 mL/min) with retention time 15.93 min (major) and 19.89 min (minor).  $^1\text{H NMR}$  (500 MHz,  $\text{CDCl}_3$ )  $\delta$  8.01 (d,  $J = 8.3$  Hz, 2H), 7.40–7.35 (m, 3H), 7.32 (ddd,  $J = 8.7, 4.5, 2.5$  Hz, 1H), 6.92 (dd,  $J = 10.0, 8.7$  Hz, 1H), 4.41 (q,  $J = 9.1$  Hz, 1H), 4.11 (td,  $J = 9.5, 5.4$  Hz, 1H), 3.94–3.87 (m, 4H), 2.75–2.63 (m, 2H), 1.68 (s, 3H).  $^{13}\text{C NMR}$  (126 MHz,  $\text{CDCl}_3$ )  $\delta$  205.6, 166.9, 161.3, 159.3, 146.0, 132.9, 132.8, 131.2, 131.1, 131.1, 130.1, 129.2, 127.9, 117.6, 117.4, 116.8, 56.7, 52.2, 40.6, 32.1, 32.1, 30.8, 30.8, 29.1. HRMS (ESI-TOF) Calcd for  $\text{C}_{20}\text{H}_{19}\text{BrFO}_3^+$   $[\text{M}+\text{H}]^+$ : 405.0502; found: 405.0489.

#### methyl 4-((1*S*,2*R*,3*S*)-2-acetyl-3-(5-bromo-2-fluorophenyl)cyclobutyl)benzoate (**7b**)

White solid (547mg, 31.5% yield, 97:3 er),  $[\alpha]_{\text{D}}^{20} = +3.5$  ( $c = 1.0$ ,  $\text{CHCl}_3$ ), m.p.: 124–126 °C. The er ratio was determined by SFC analysis on a Chiralpak IC column (10% isopropanol in  $\text{CO}_2$ , 2.0 mL/min) with retention time 12.79 min (minor) and 14.90 min (major).  $^1\text{H NMR}$  (500 MHz,  $\text{CDCl}_3$ )  $\delta$  8.04–7.98 (m, 2H), 7.51 (dd,  $J = 6.7, 2.5$  Hz, 0.74H),

7.39 (dd,  $J = 6.6, 2.5$  Hz, 0.28H), 7.38–7.31 (m, 3H), 6.93 (dt,  $J = 9.6, 8.3$  Hz, 1H), 4.36–4.23 (m, 1.48H), 3.92 (s, 3H), 3.82–3.76 (m, 1H), 3.70 (q,  $J = 9.3$  Hz, 0.30H), 3.47 (t,  $J = 9.6$  Hz, 0.29H), 2.77–2.61 (m, 1.81H), 2.34 (q,  $J = 10.5$  Hz, 0.29H), 2.03 (s, 0.80H), 1.85 (s, 2.15H).  $^{13}\text{C}$  NMR (126 MHz,  $\text{CDCl}_3$ )  $\delta$  206.8, 206.1, 167.1, 160.7, 158.8, 148.9, 147.8, 131.7, 131.7, 131.5, 131.5, 130.2, 130.1, 128.5, 127.0, 126.7, 117.2, 117.0, 59.5, 57.7, 52.2, 39.9, 37.4, 32.5, 32.5, 29.1, 28.9. HRMS (ESI-TOF) Calcd for  $\text{C}_{20}\text{H}_{19}\text{BrFO}_3^+$   $[\text{M}+\text{H}]^+$ : 405.0502; found: 405.0489.

### Scheme S3 Proposed Mechanism of Two Different Di-Arylation Procedure

#### one-pot (4a)

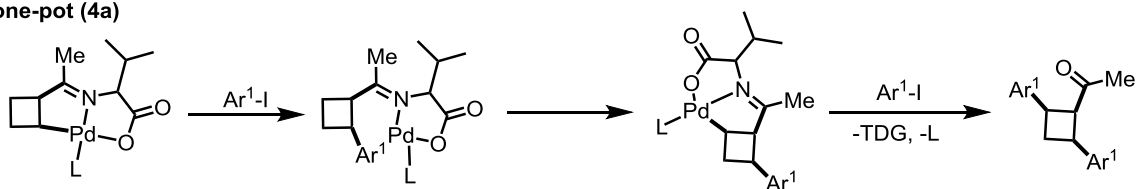

#### stepwise (7a and 7b)

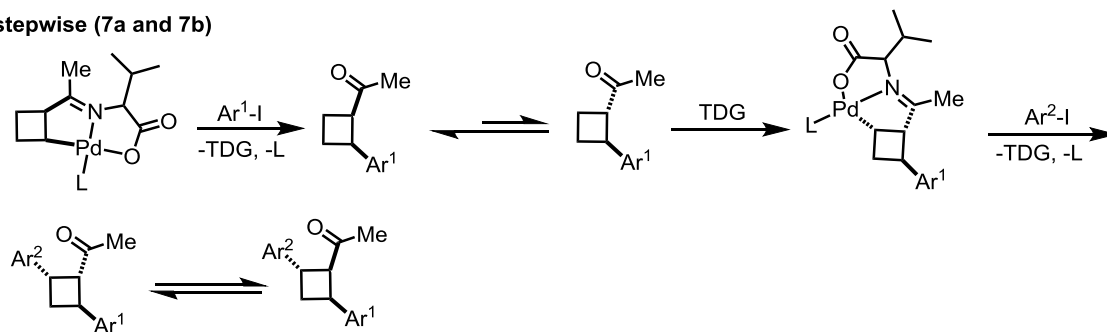

## 6. Deuterium-Labeling Experiments

### Scheme S4

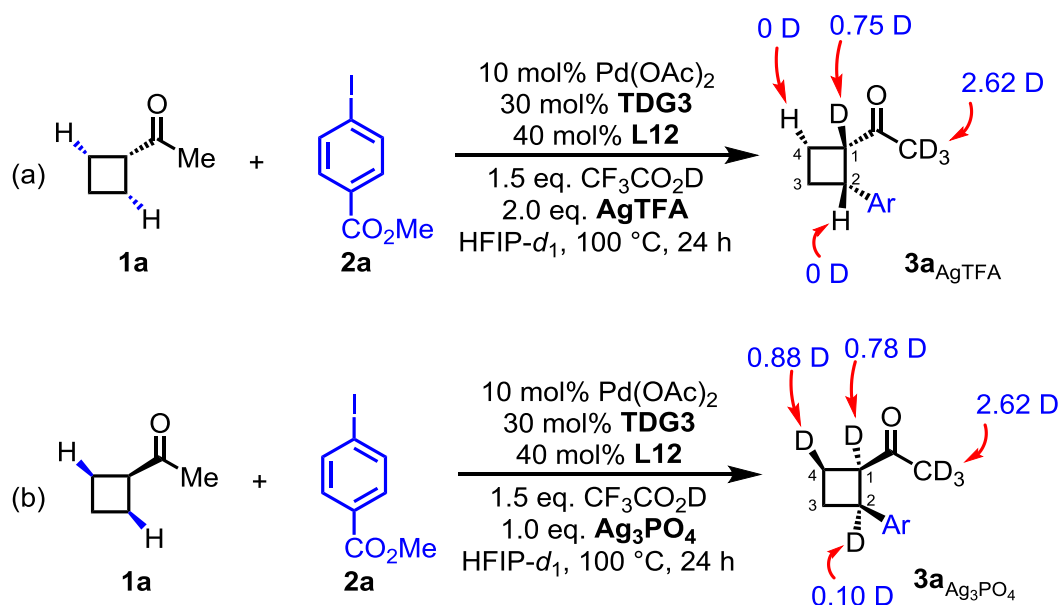

The experiment was performed according to the above-described general procedure using  $\text{CF}_3\text{CO}_2\text{D}$  and  $\text{HFIP-}d_1$ .

#### *d*-methyl 4-(2-acetylcyclobutyl)benzoate ( $3a_{\text{AgTFA}}$ )

$^1\text{H}$  NMR (500 MHz,  $\text{CDCl}_3$ )  $\delta$  8.03–7.99 (m, 2H), 7.35–7.30 (m, 1.81H), 3.93 (s, 3H), 3.79 (q,  $J = 7.6$  Hz, 1H), 3.38–3.29 (m, 0.25H), 2.31–2.14 (m, 4H), 2.07–2.03 (m, 0.38H).

#### *d*-methyl 4-(2-acetylcyclobutyl)benzoate ( $3a_{\text{Ag}_3\text{PO}_4}$ )

$^1\text{H}$  NMR (500 MHz,  $\text{CDCl}_3$ )  $\delta$  8.03–7.96 (m, 2H), 7.35–7.30 (m, 1.08H), 3.93 (s, 3H), 3.78 (t,  $J = 8.8$  Hz, 0.90H), 3.32 (t,  $J = 8.8$  Hz, 0.22H), 2.32–2.13 (m, 3.12H), 2.07–2.03 (m, 0.38H).

**Scheme S5**

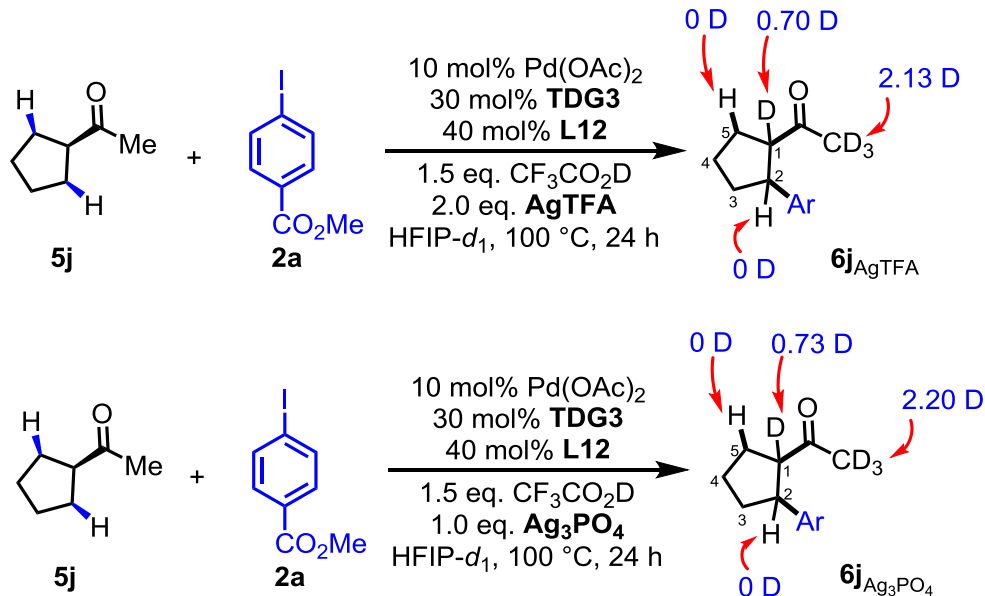

The experiment was performed according to the above-described general procedure using CF<sub>3</sub>CO<sub>2</sub>D and HFIP-*d*<sub>1</sub>.

***d*-methyl 4-(2-acetylcyclopentyl)benzoate (**6j**<sub>AgTFA</sub>)**

<sup>1</sup>H NMR (500 MHz, CDCl<sub>3</sub>) δ 7.96 (t, *J* = 3.4 Hz, 2H), 7.30 (d, *J* = 8.4 Hz, 0.94H), 3.90 (s, 3H), 3.36 (t, *J* = 8.5 Hz, 1H), 3.03 (q, *J* = 8.8 Hz, 0.30H), 2.23–2.16 (m, 1H), 2.14–2.08 (m, 1H), 2.03–1.97 (m, 0.87H), 1.94–1.86 (m, 2H), 1.83–1.74 (m, 2H).

***d*-methyl 4-(2-acetylcyclopentyl)benzoate (**6j**<sub>Ag<sub>3</sub>PO<sub>4</sub></sub>)**

<sup>1</sup>H NMR (500 MHz, CDCl<sub>3</sub>) δ 7.99–7.93 (m, 2H), 7.30 (d, *J* = 8.4 Hz, 0.65H), 3.90 (s, 3H), 3.36 (t, *J* = 8.5 Hz, 1H), 3.03 (q, *J* = 8.5 Hz, 0.27H), 2.23–2.16 (m, 1H), 2.15–2.05 (m, 1H), 2.04–1.98 (m, 0.90H), 1.95–1.84 (m, 2H), 1.84–1.72 (m, 2H).



## 7. References

- (1) Hong, K.; Park, H.; Yu, J.-Q. Methylene C( $sp^3$ )-H Arylation of Aliphatic Ketones Using a Transient Directing Group. *ACS Catal.* **2017**, *7*, 6938.
- (2) Zhang, F.-L.; Hong, K.; Li, T.-J.; Park, H.; Yu, J.-Q. Functionalization of C( $sp^3$ )-H Bonds Using a Transient Directing Group. *Science* **2016**, *351*, 252.

## 8. NMR spectra

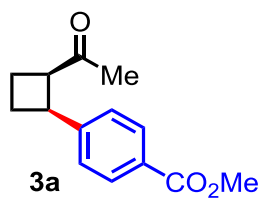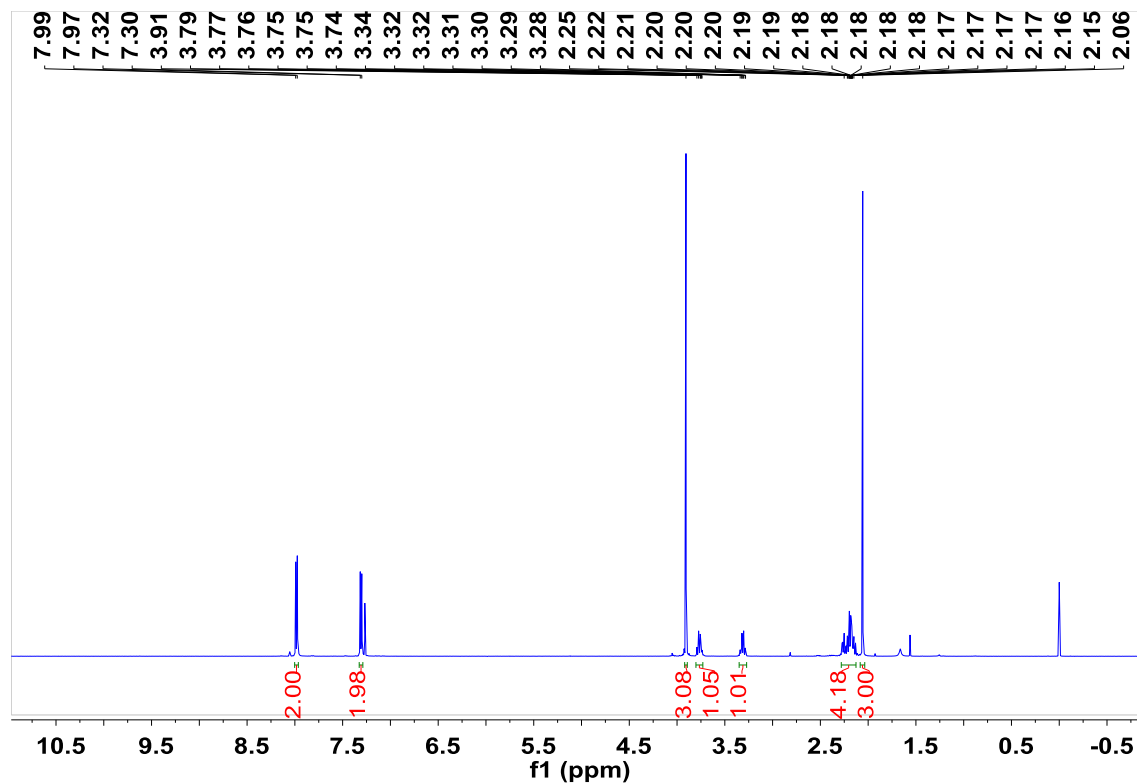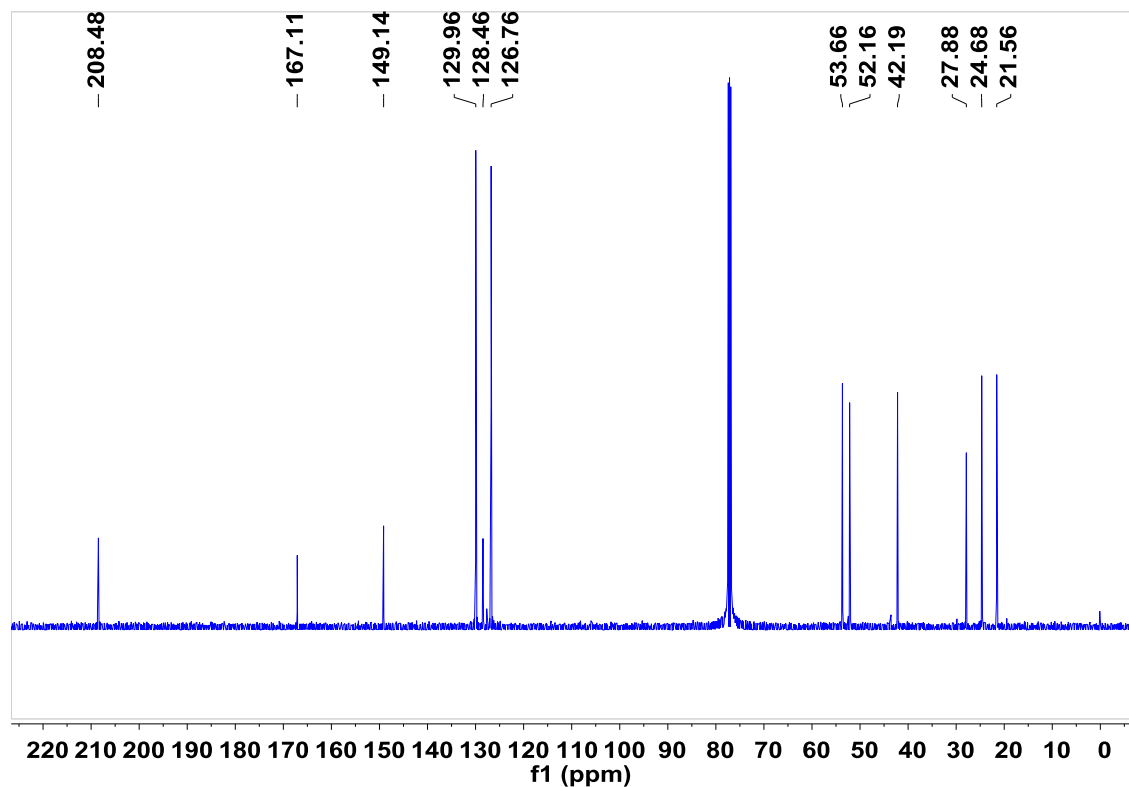

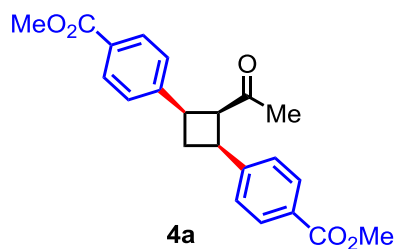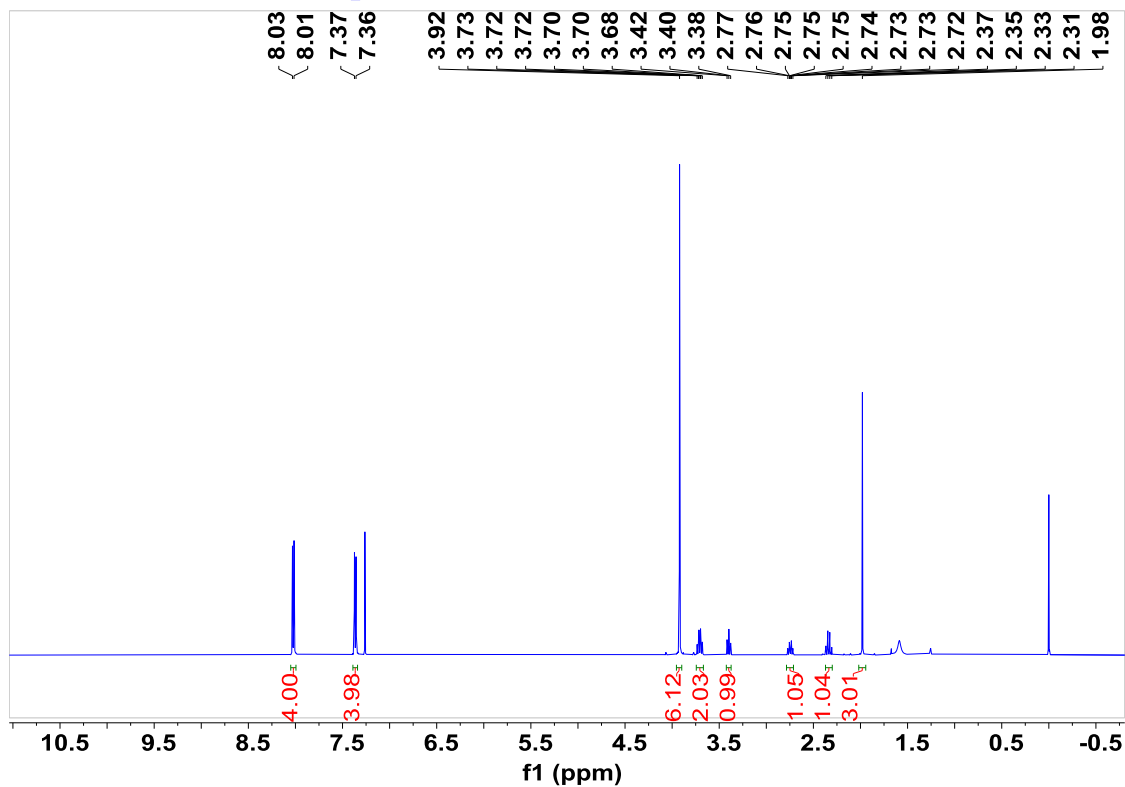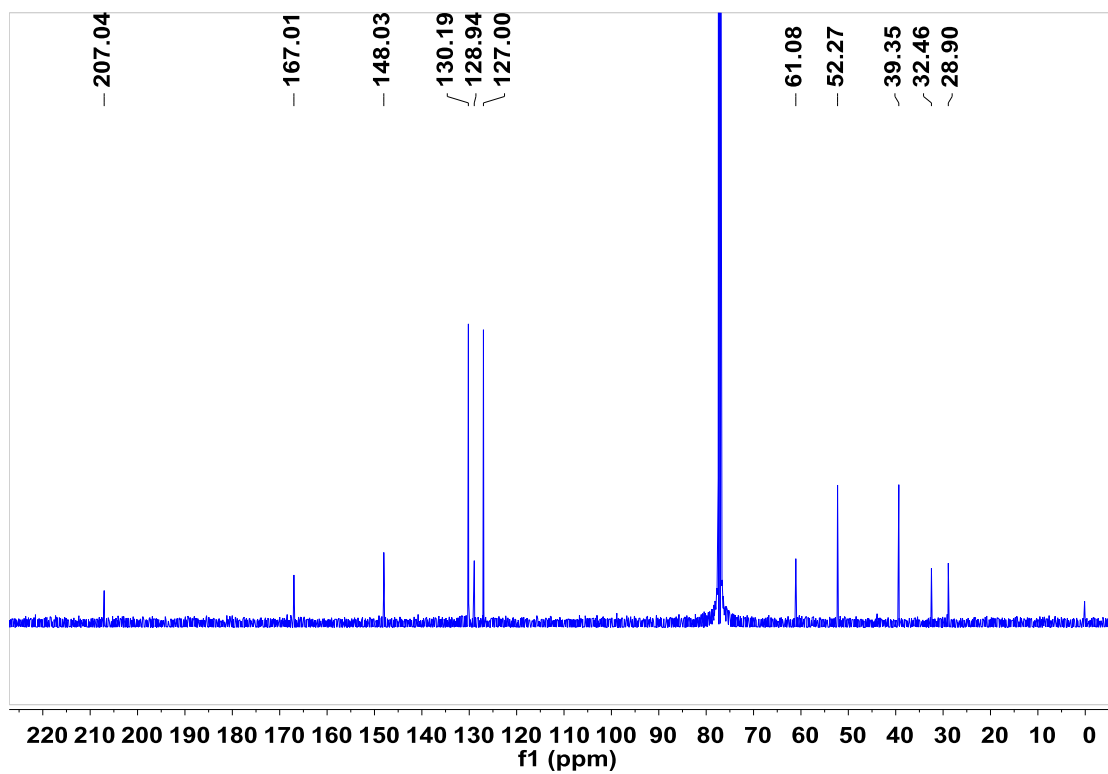

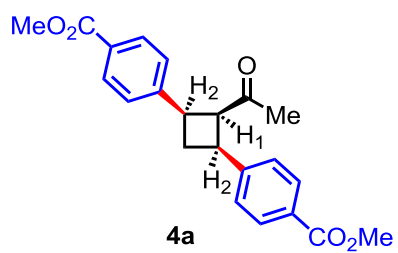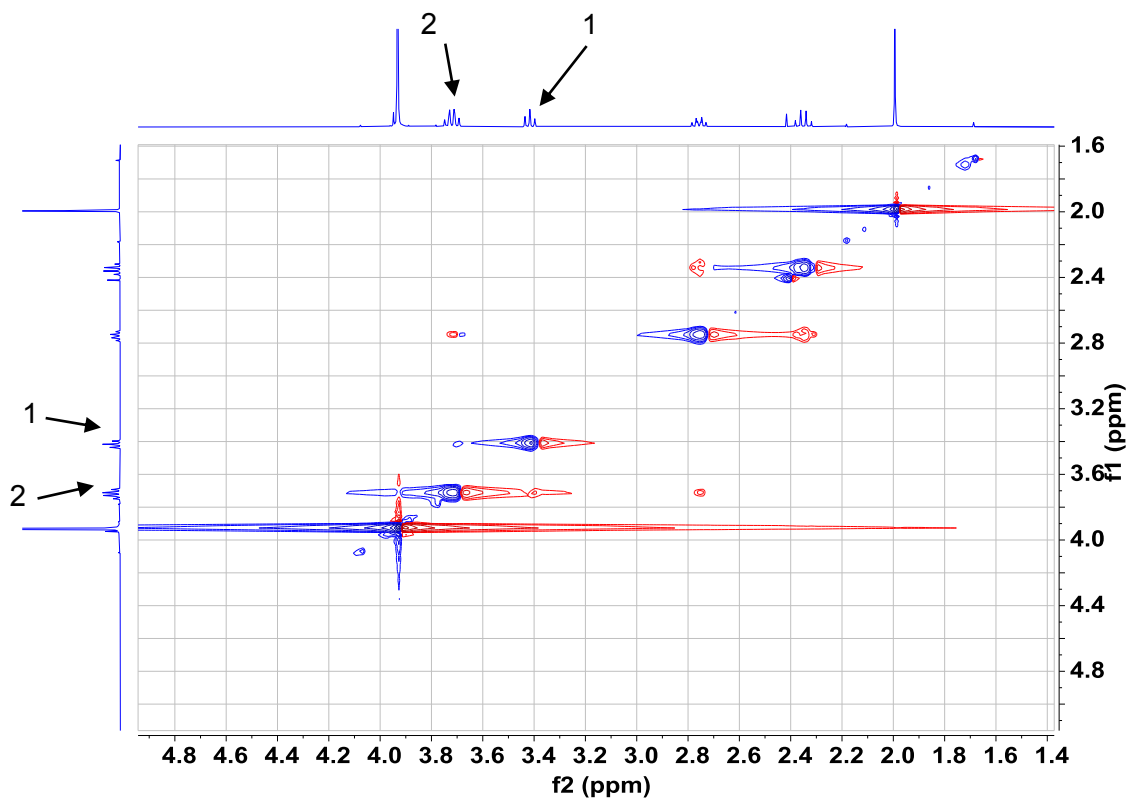

NOE 2D spectrum for **4a**

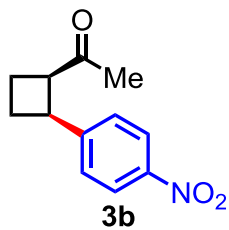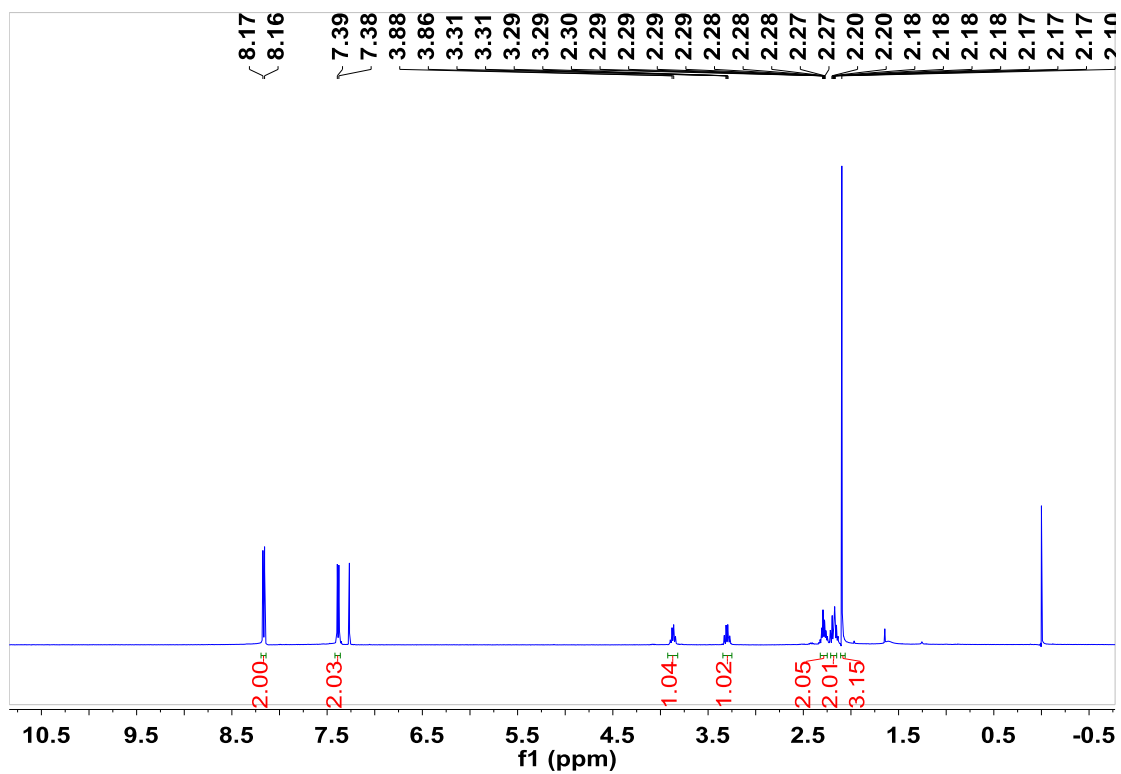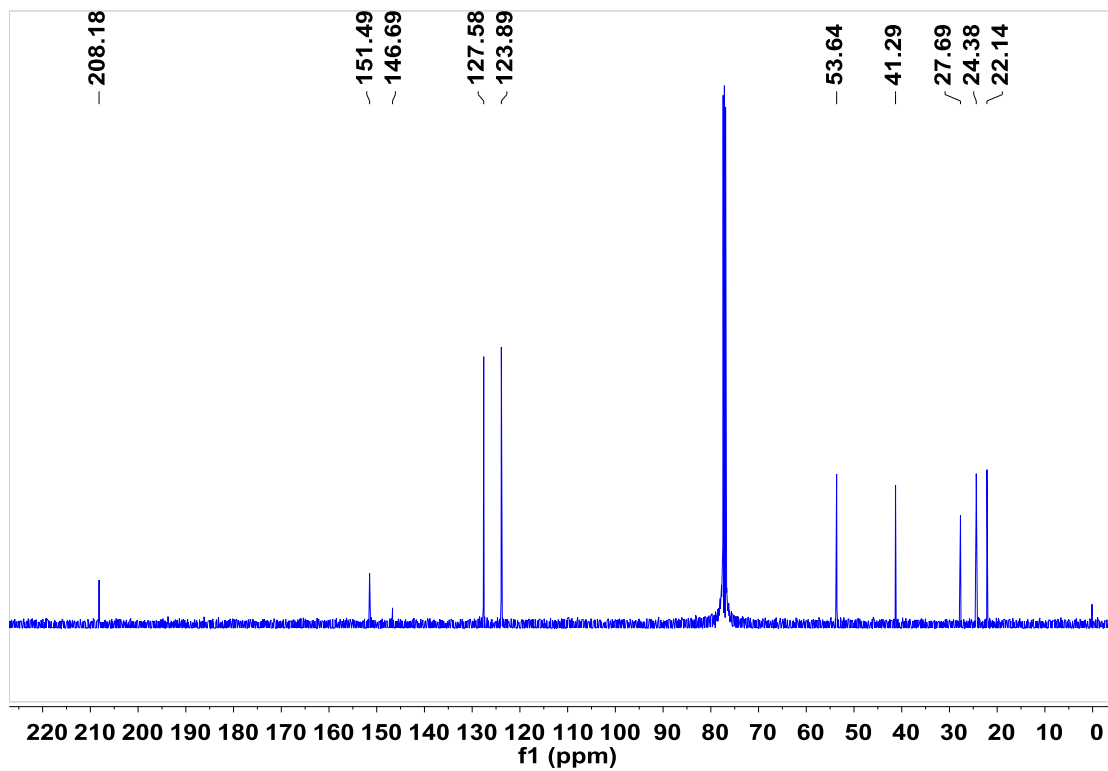

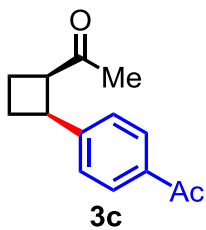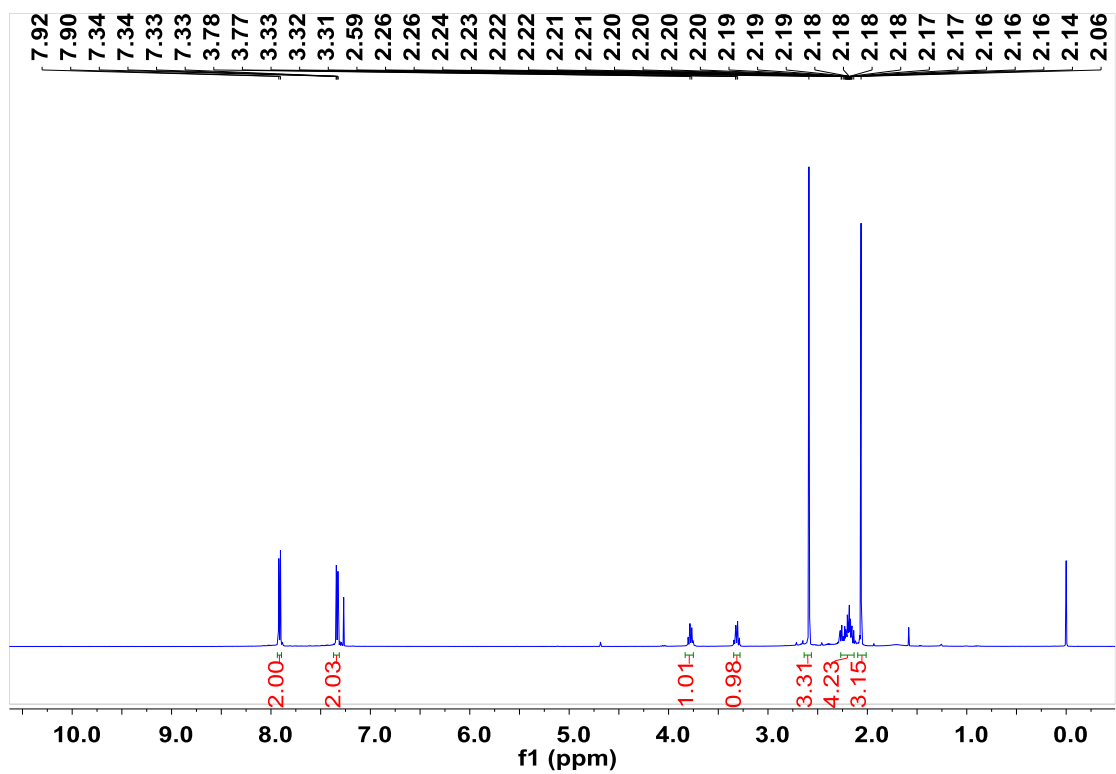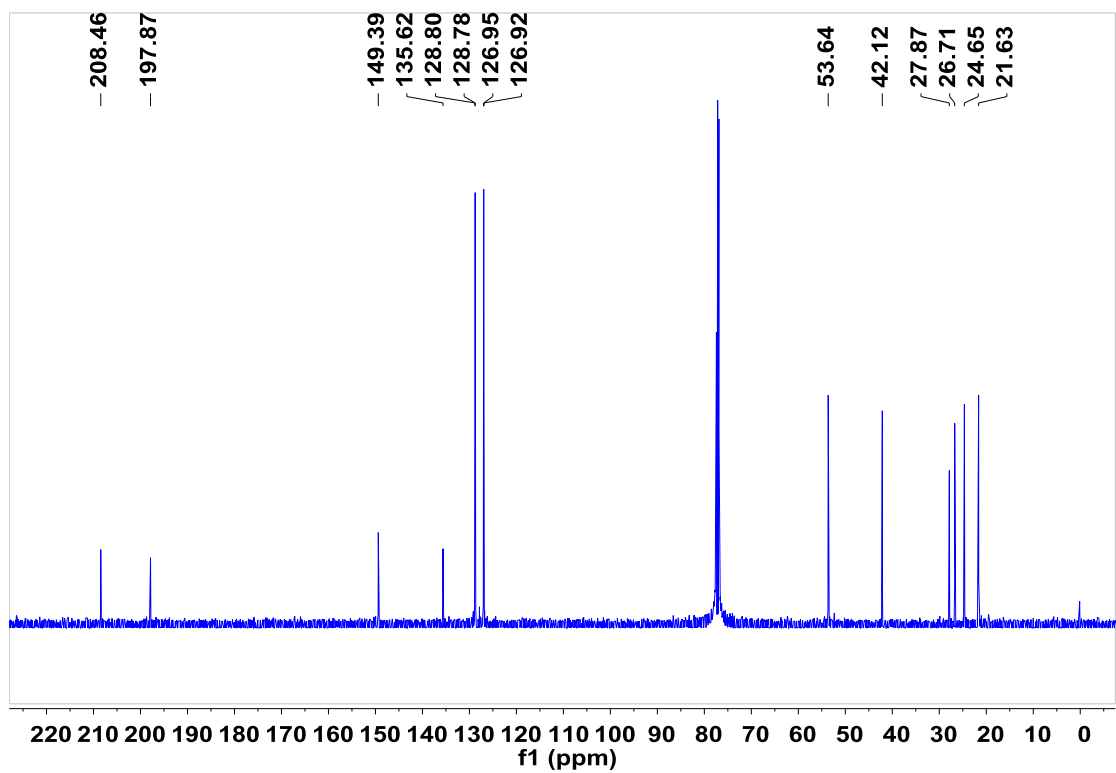

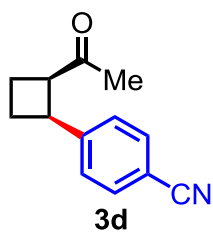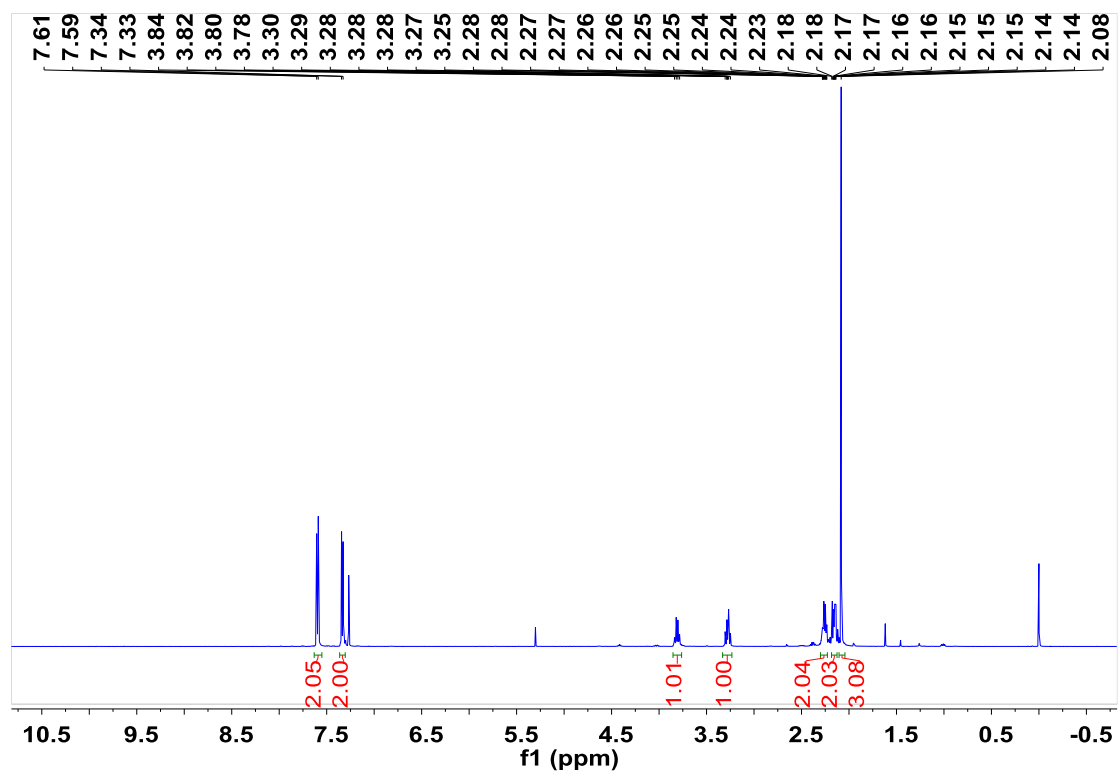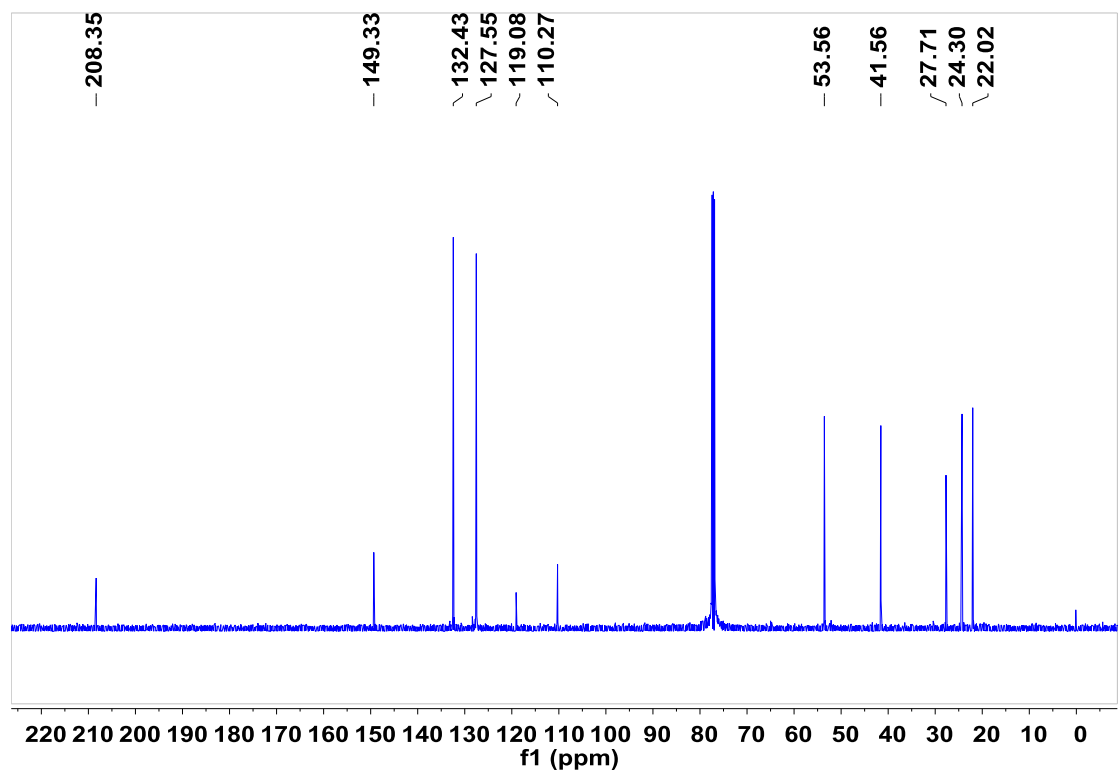

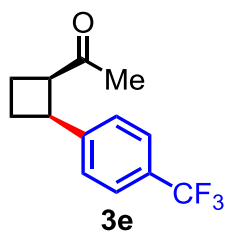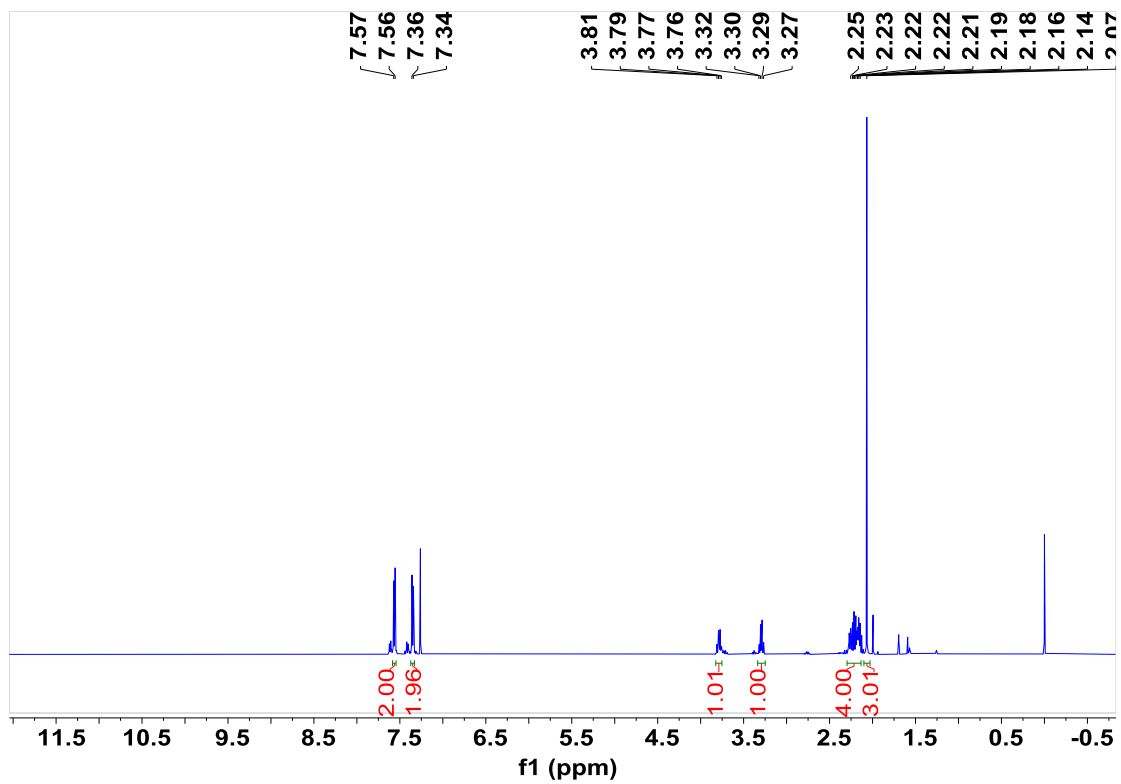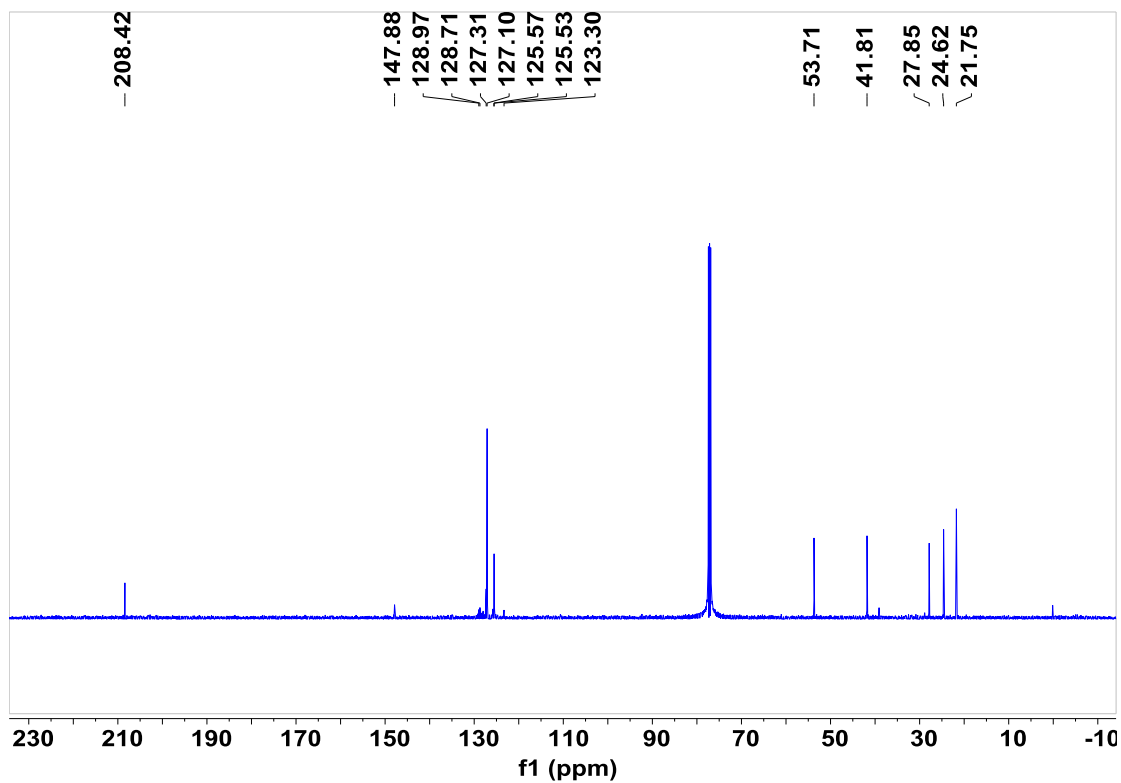



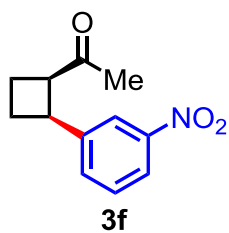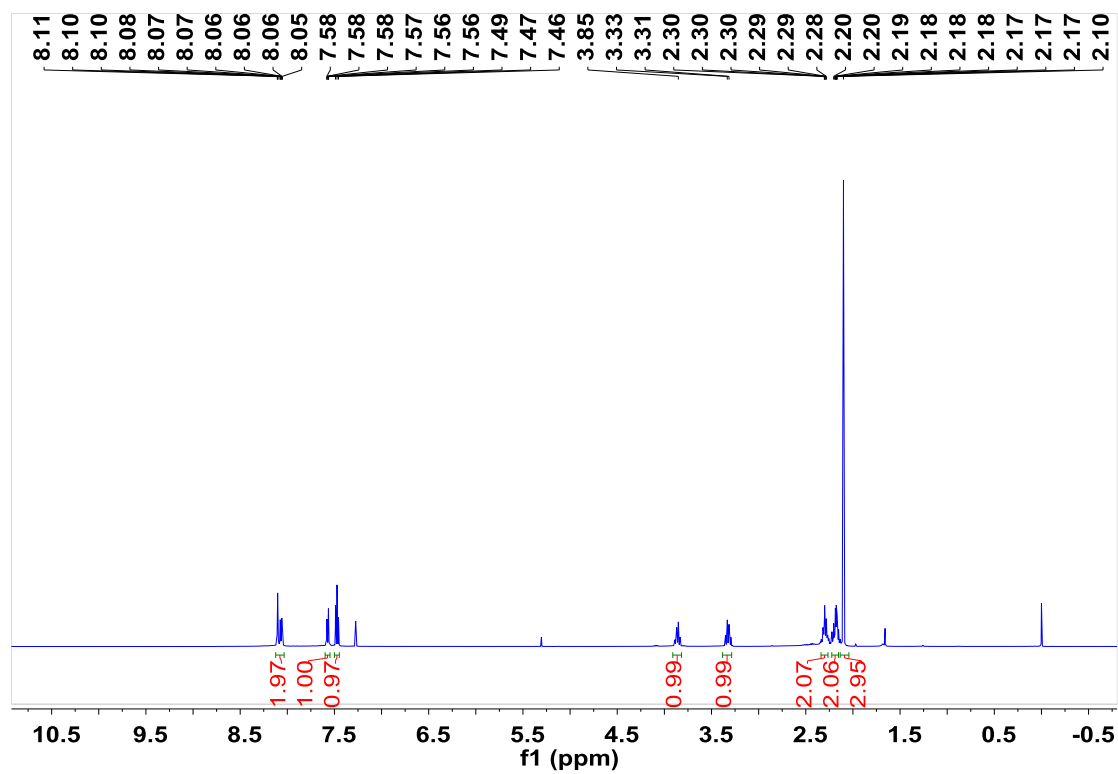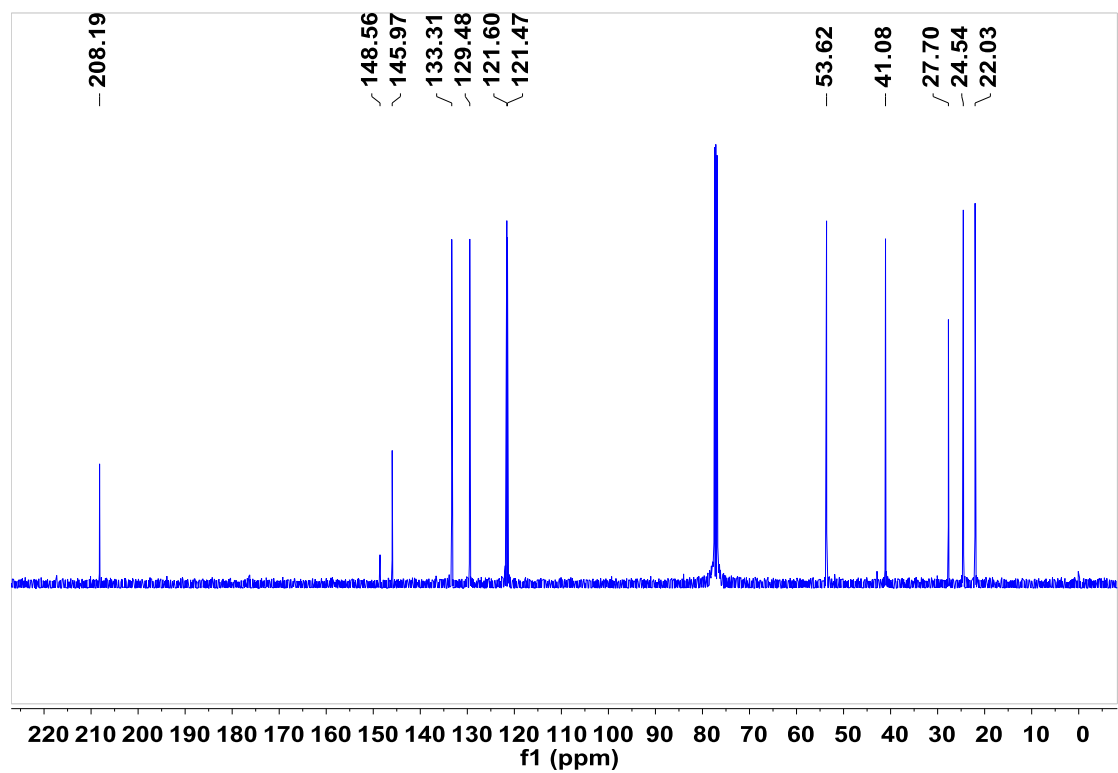

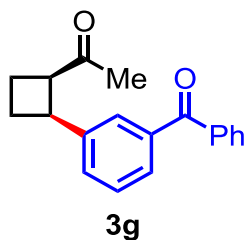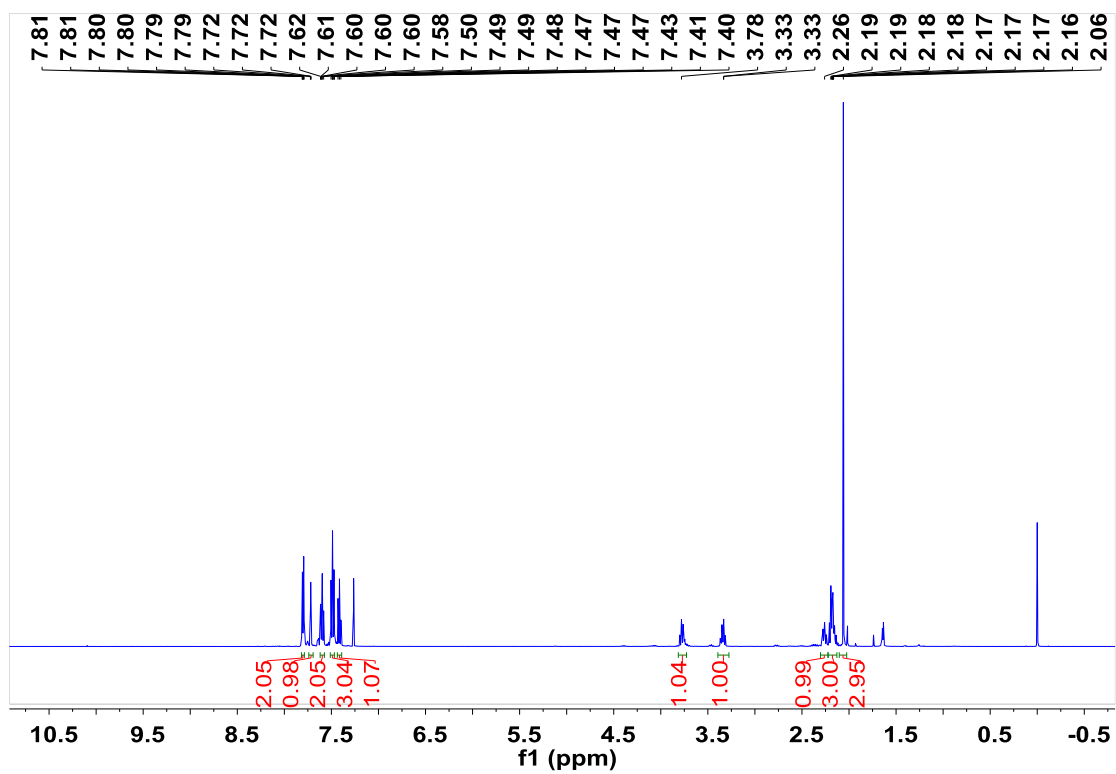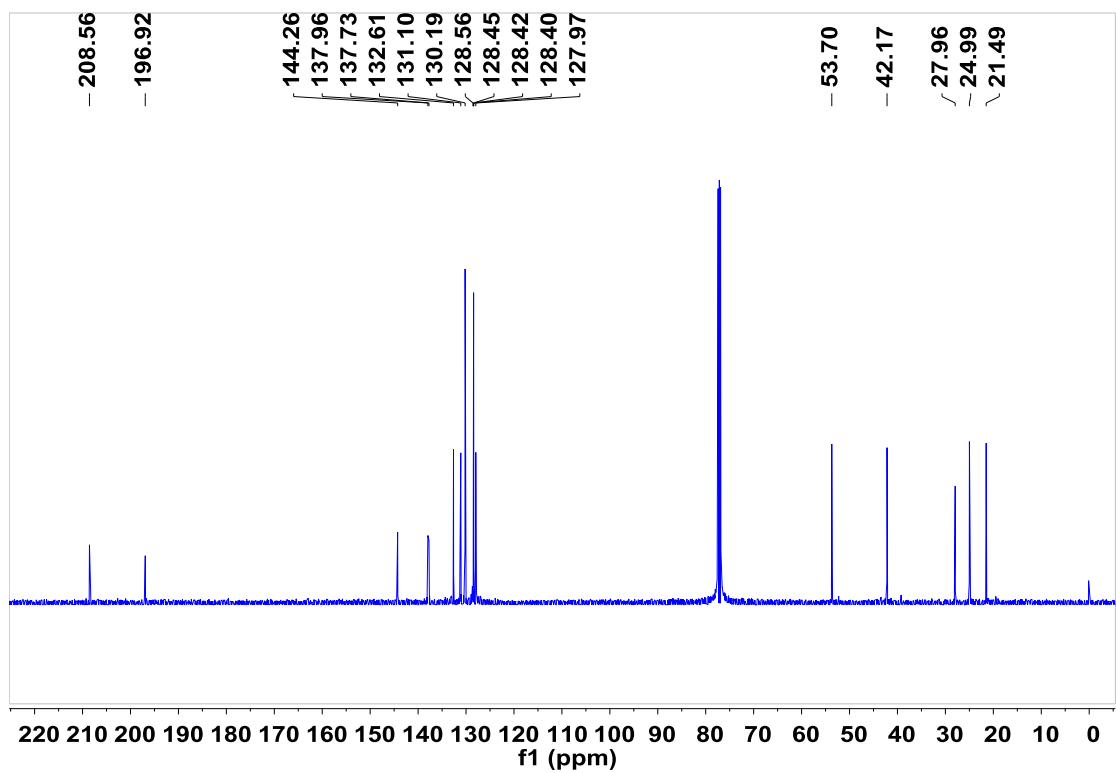

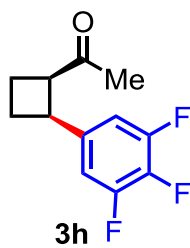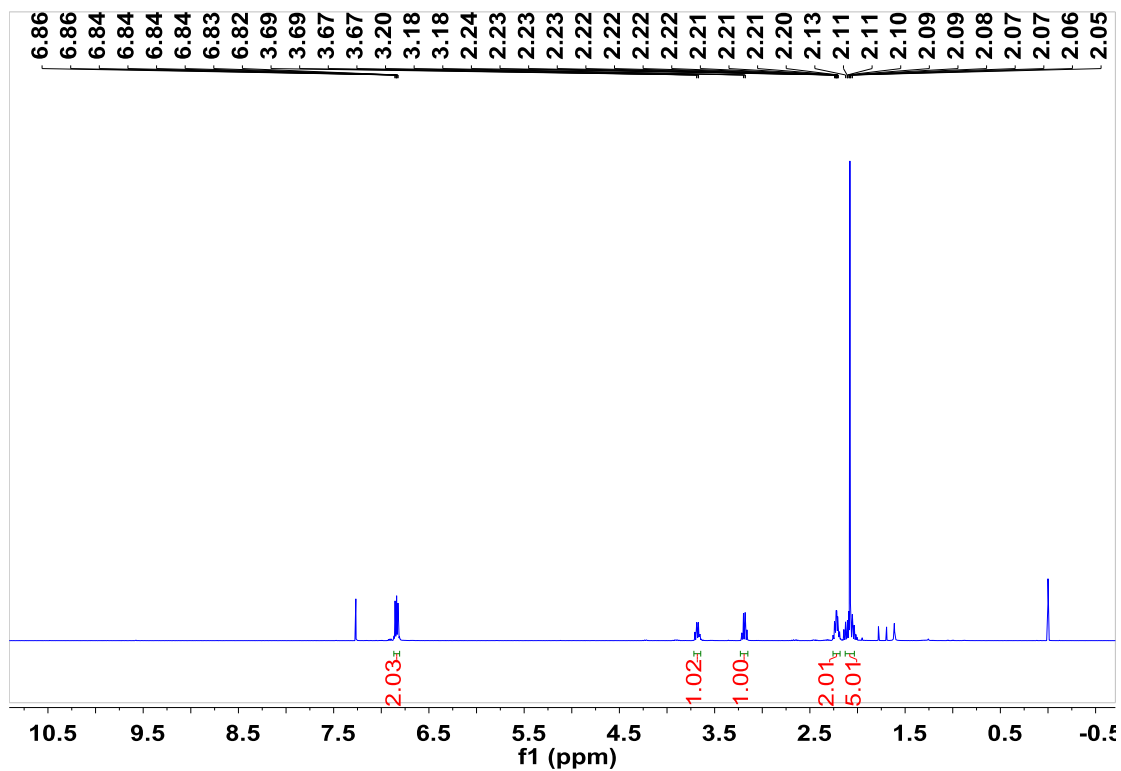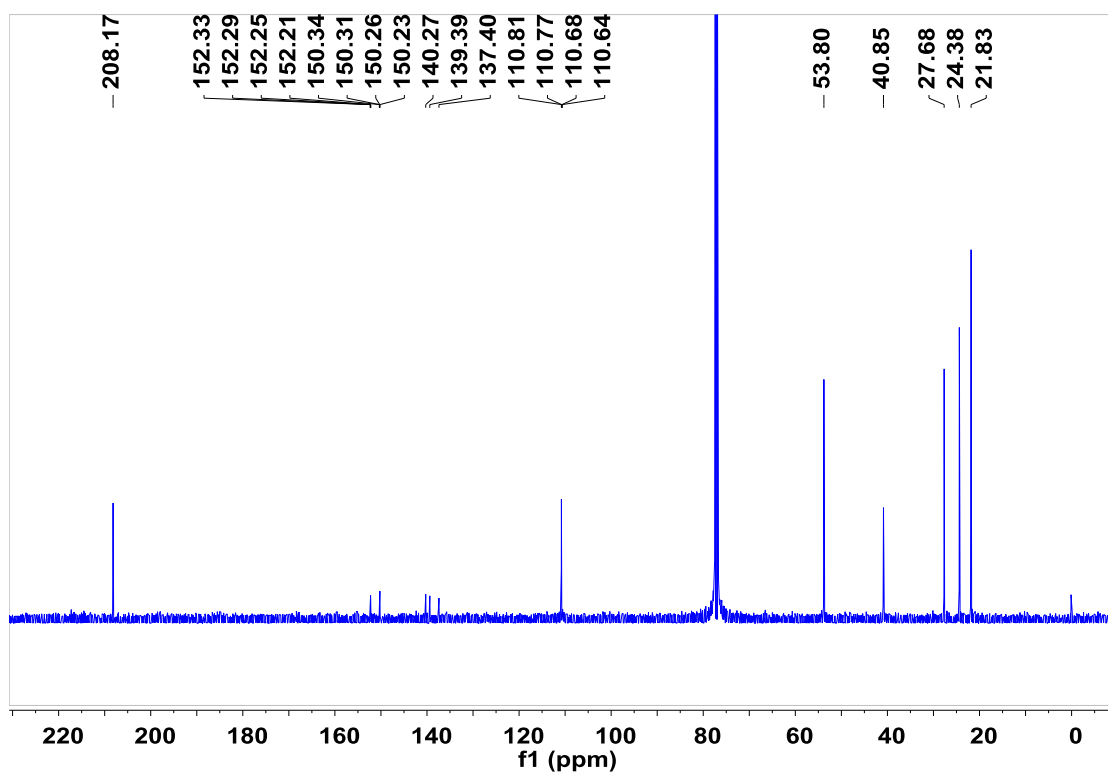

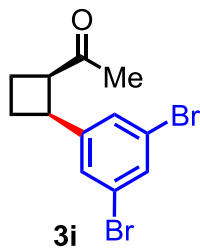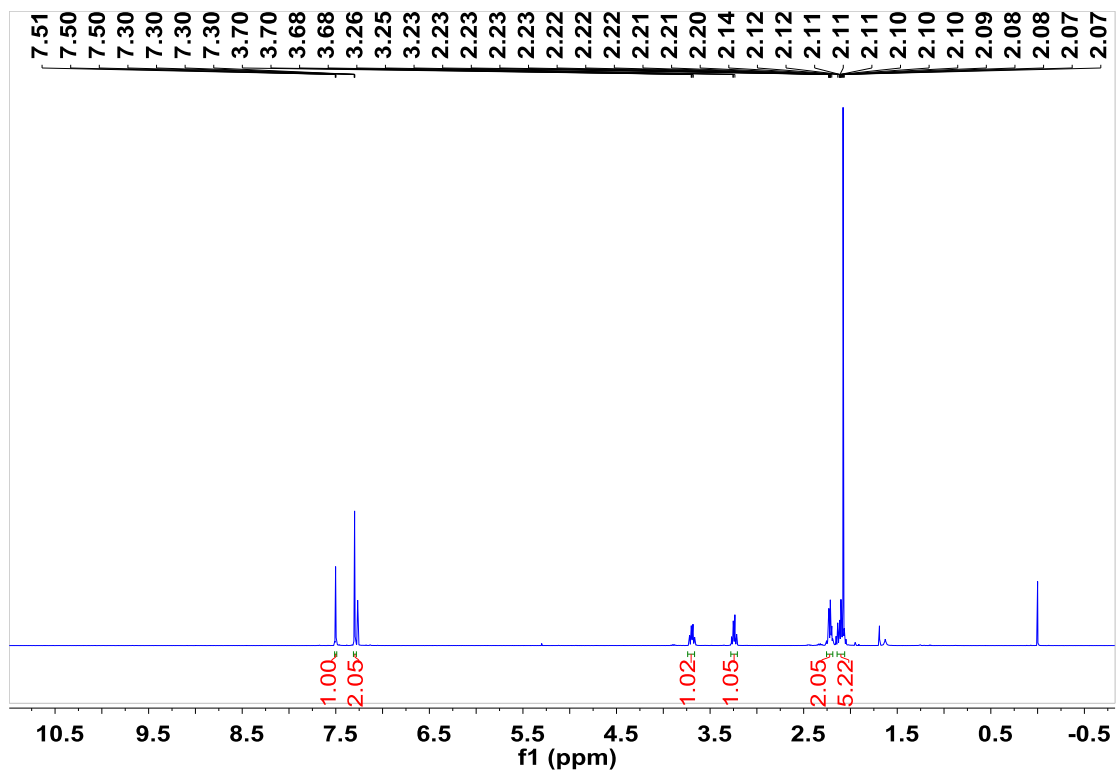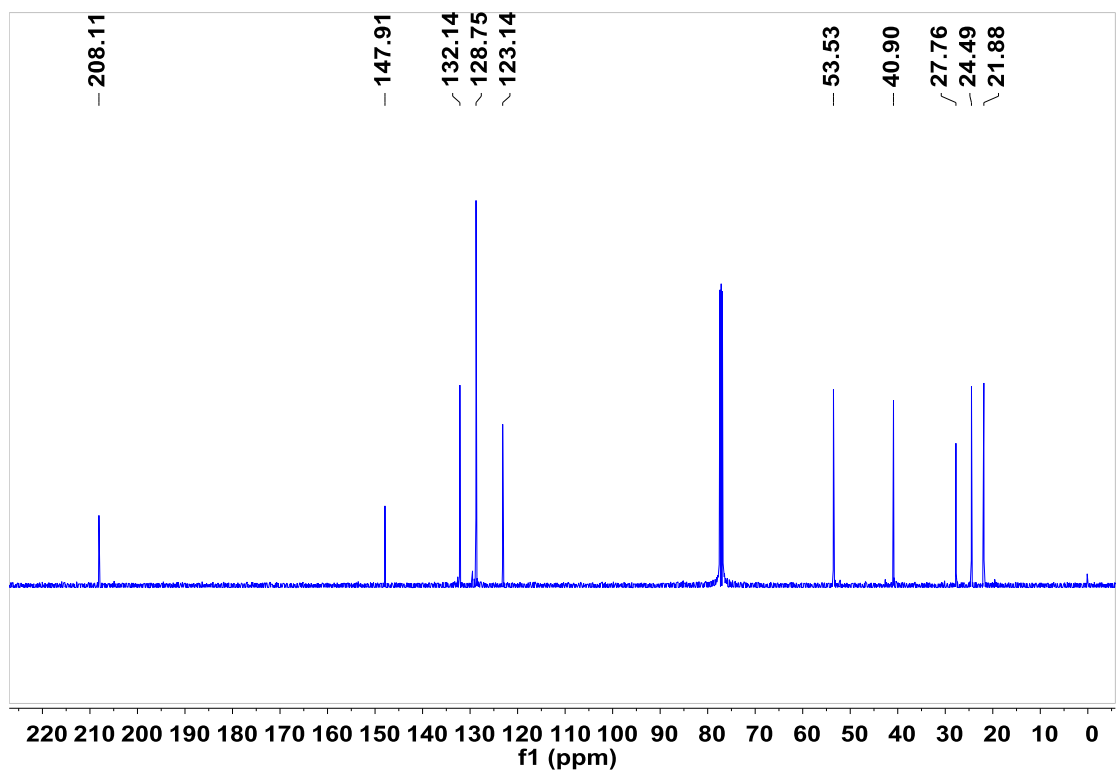

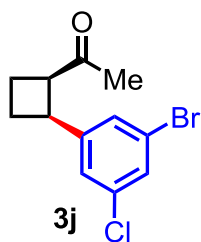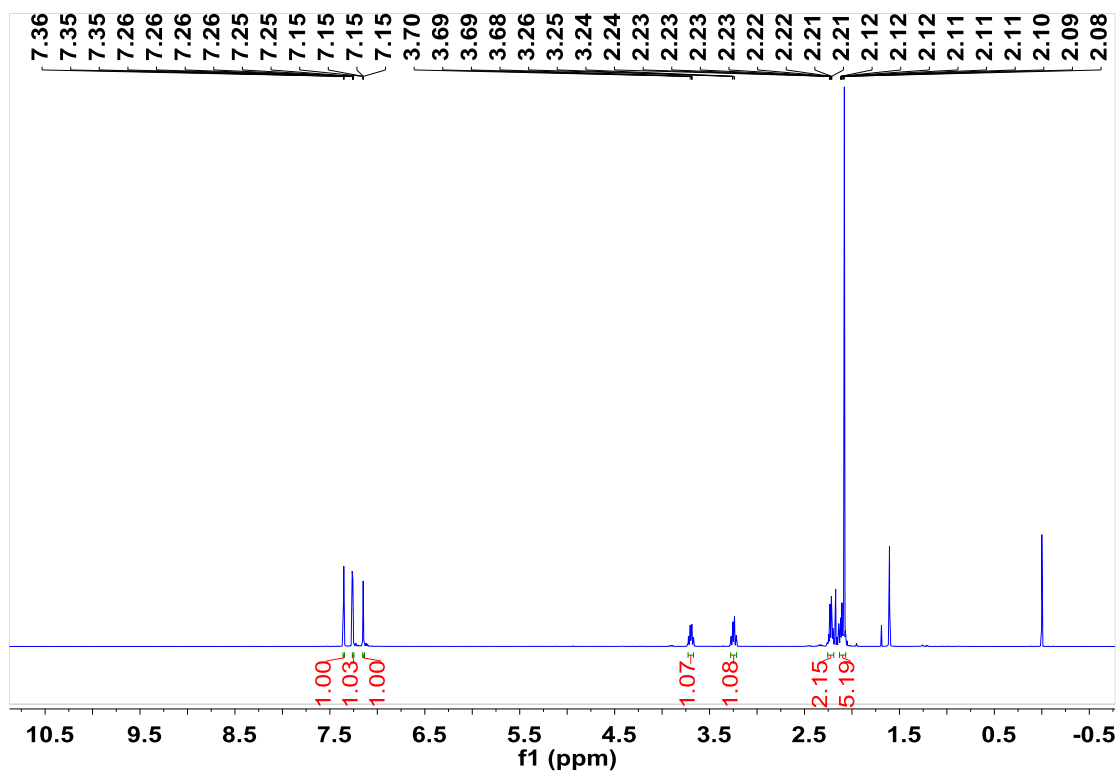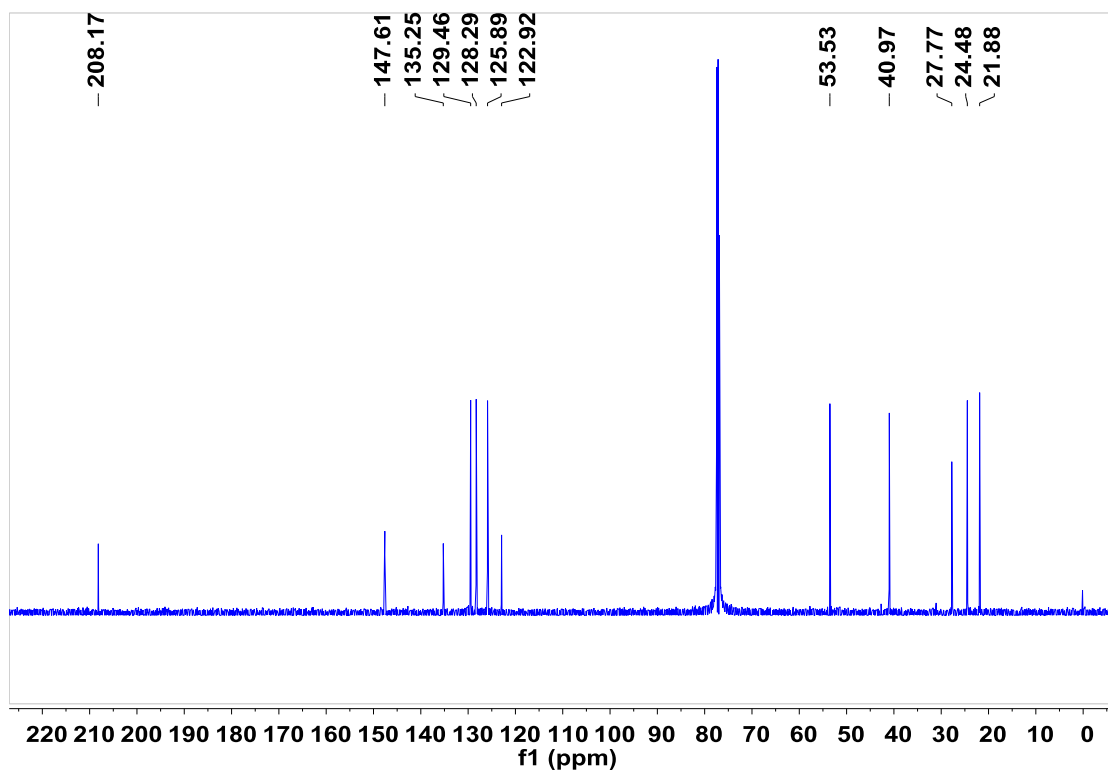

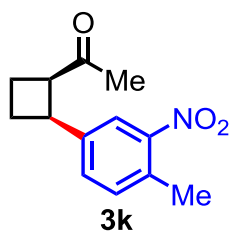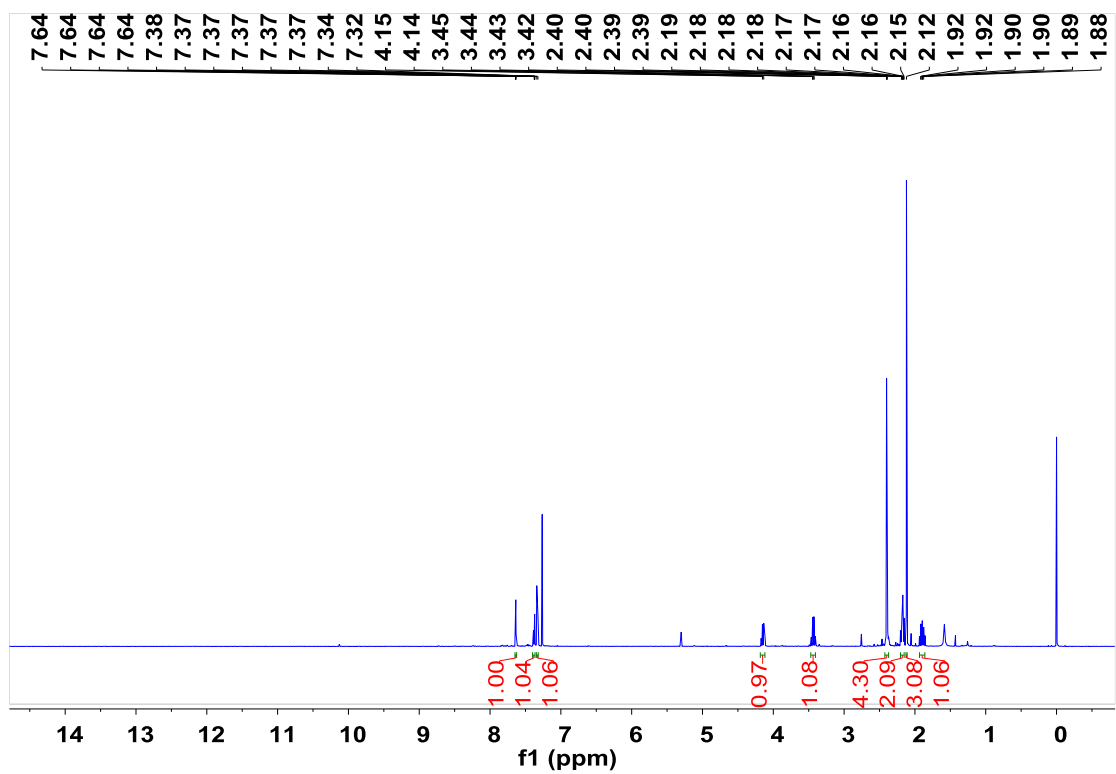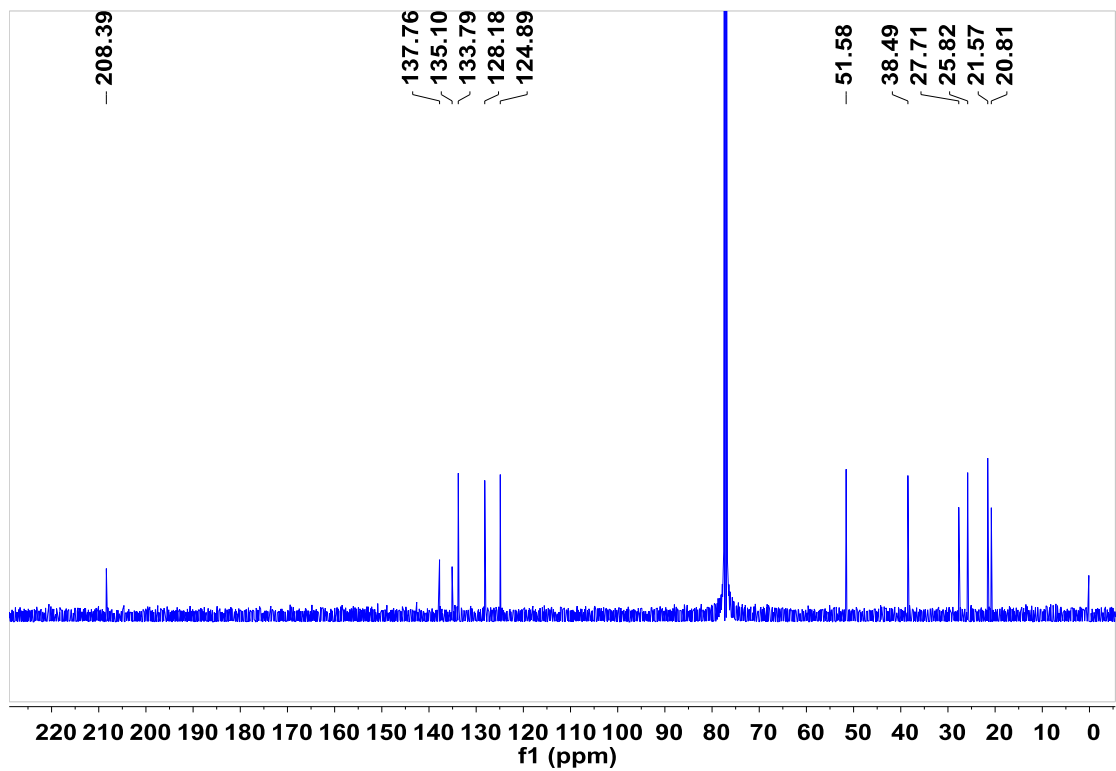

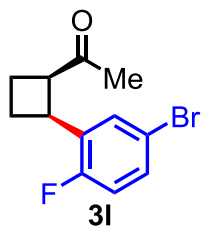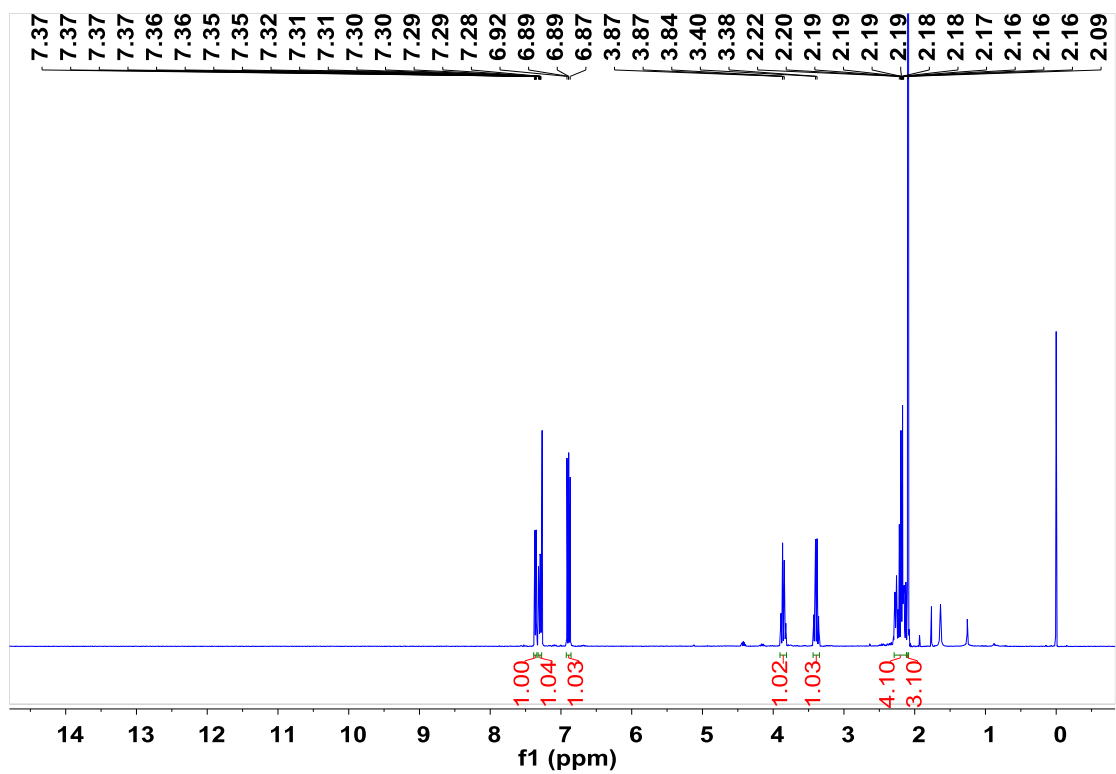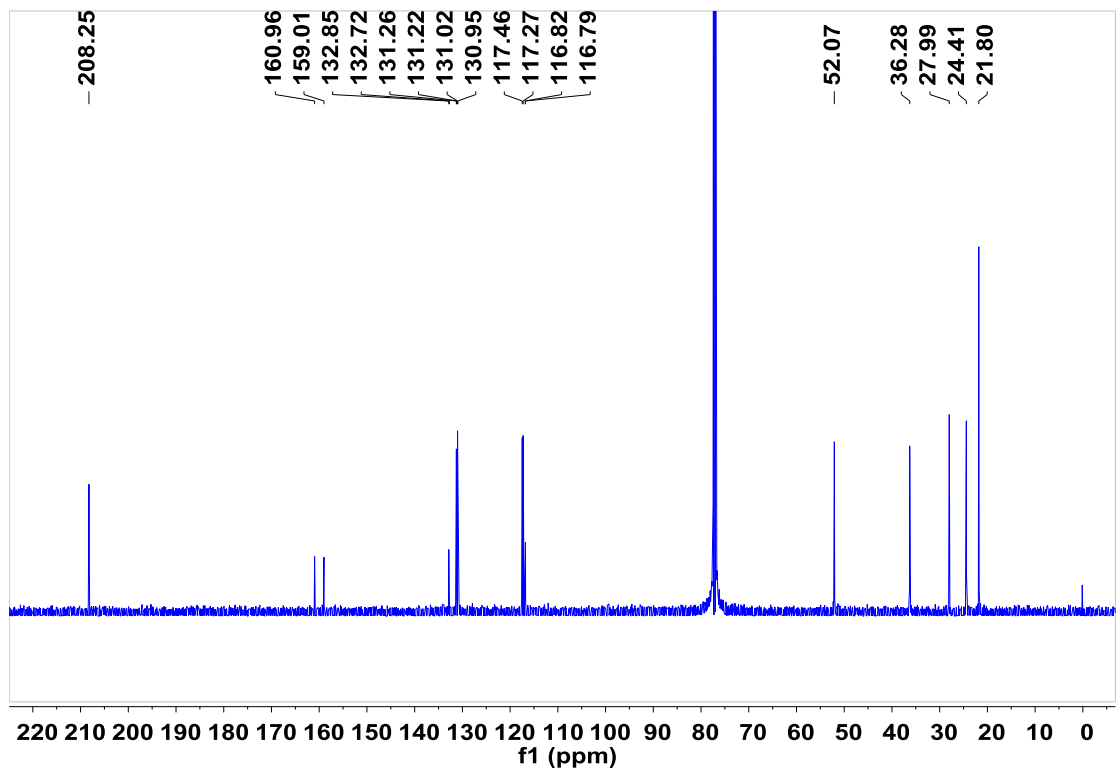

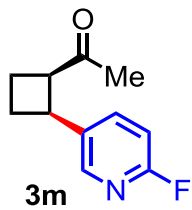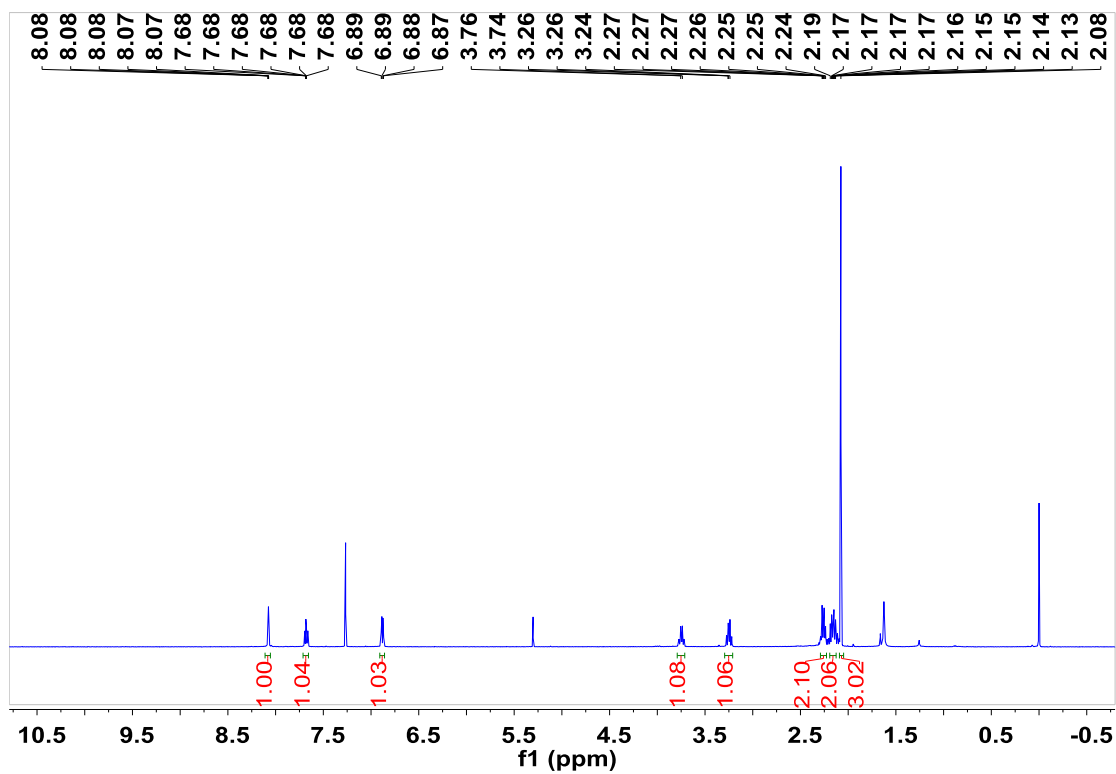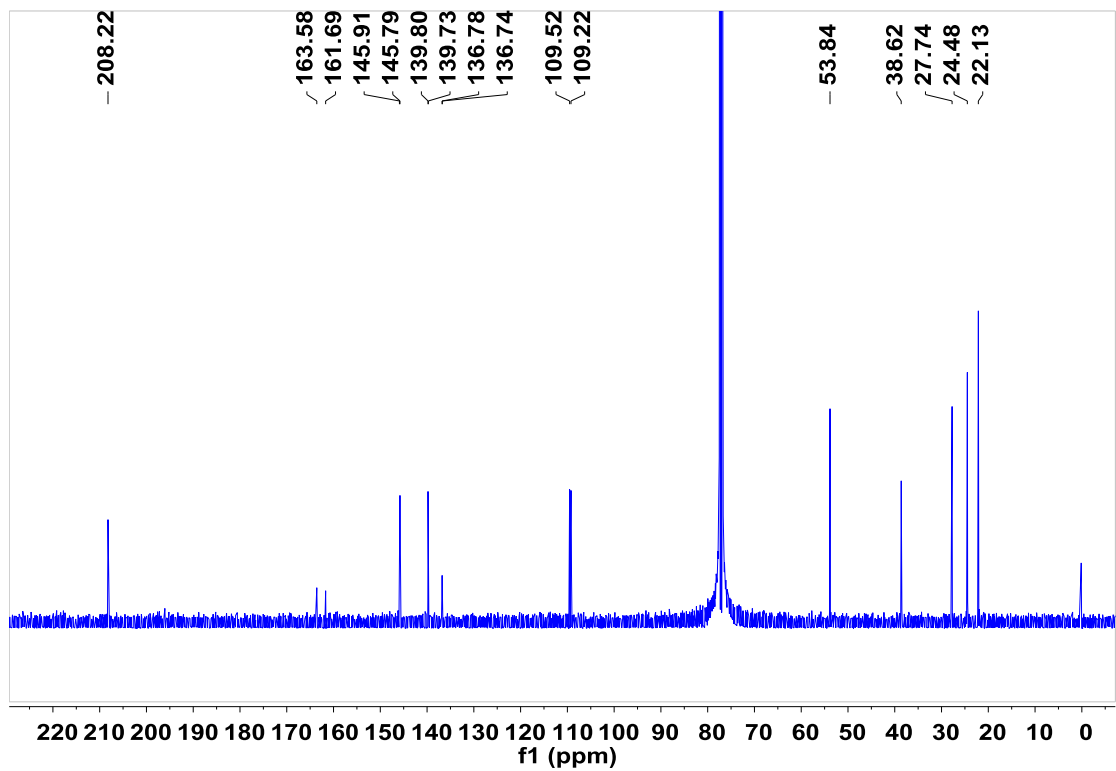



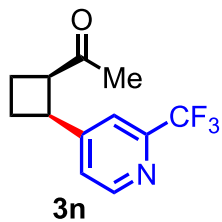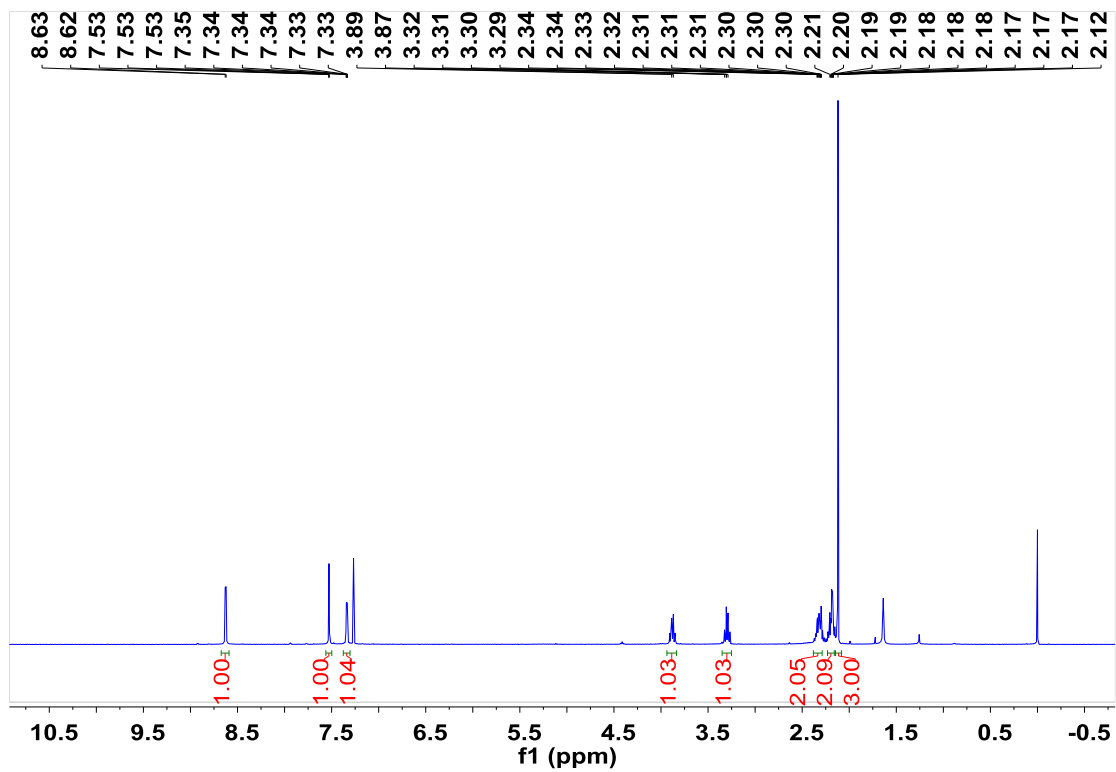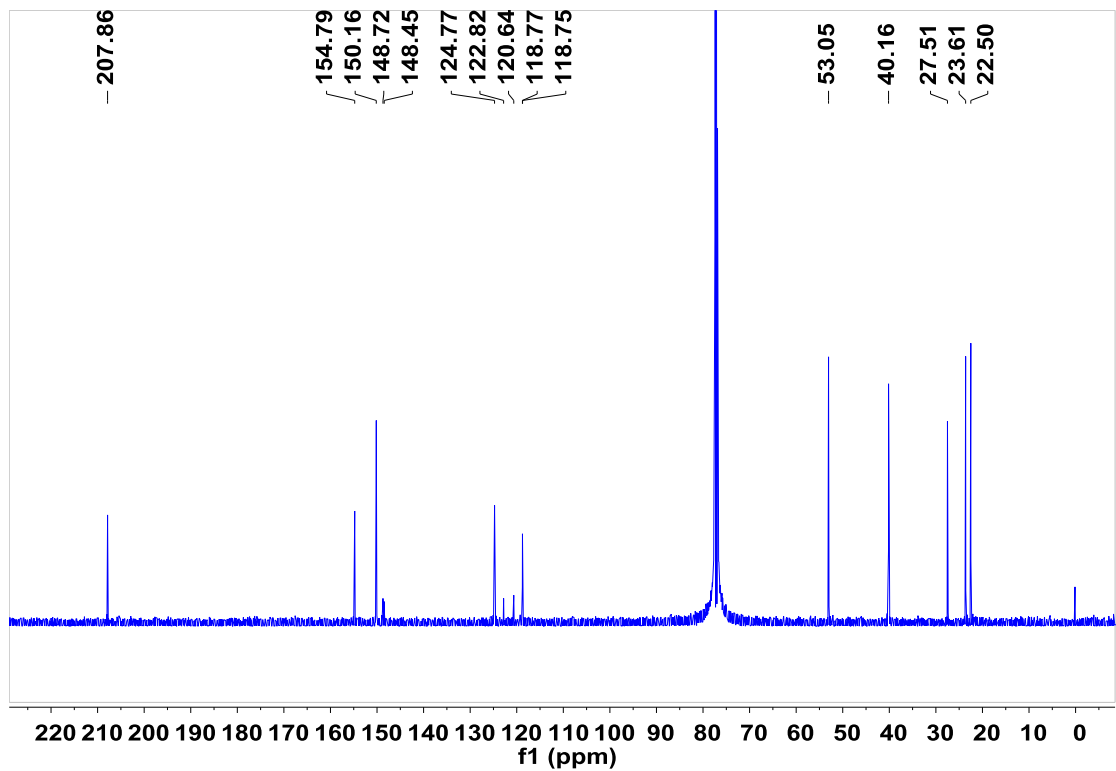

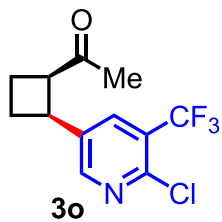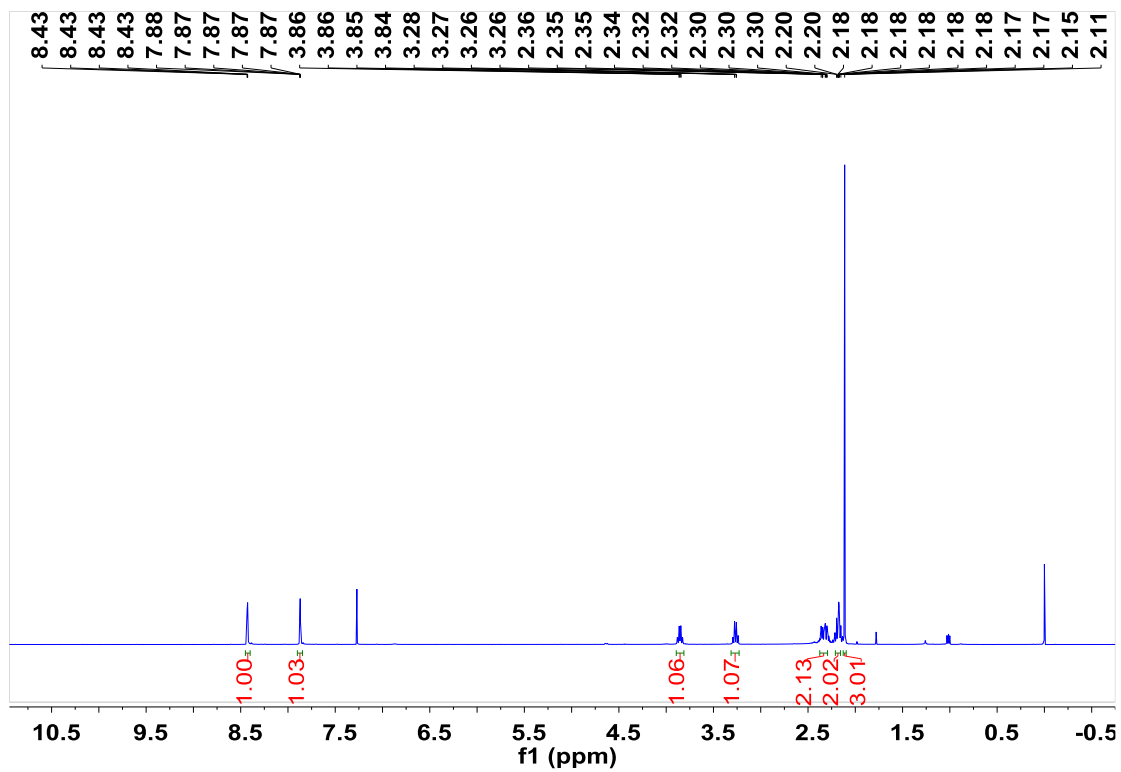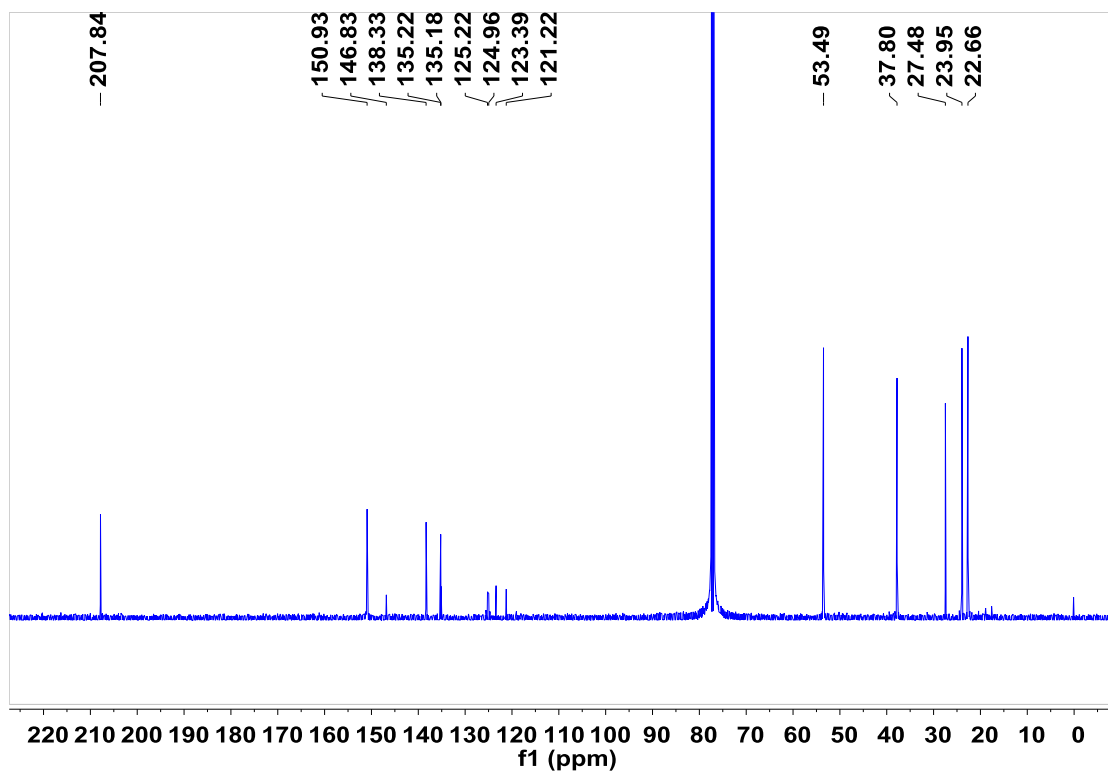

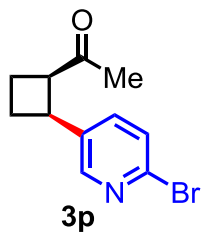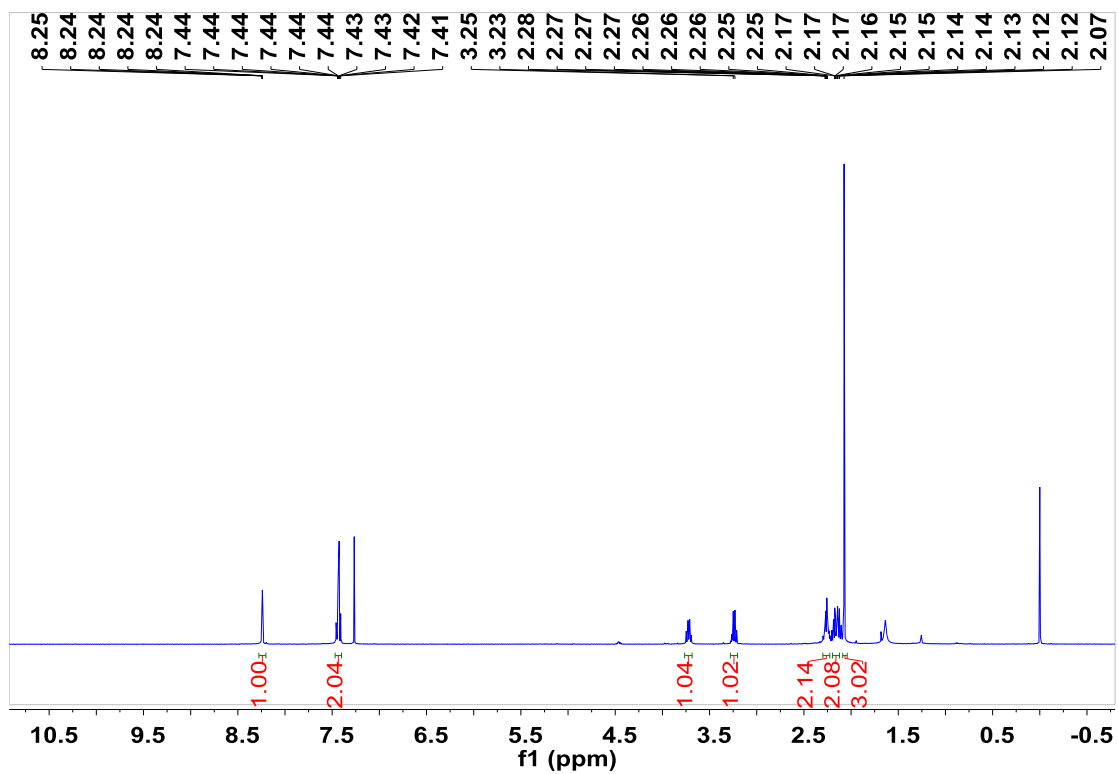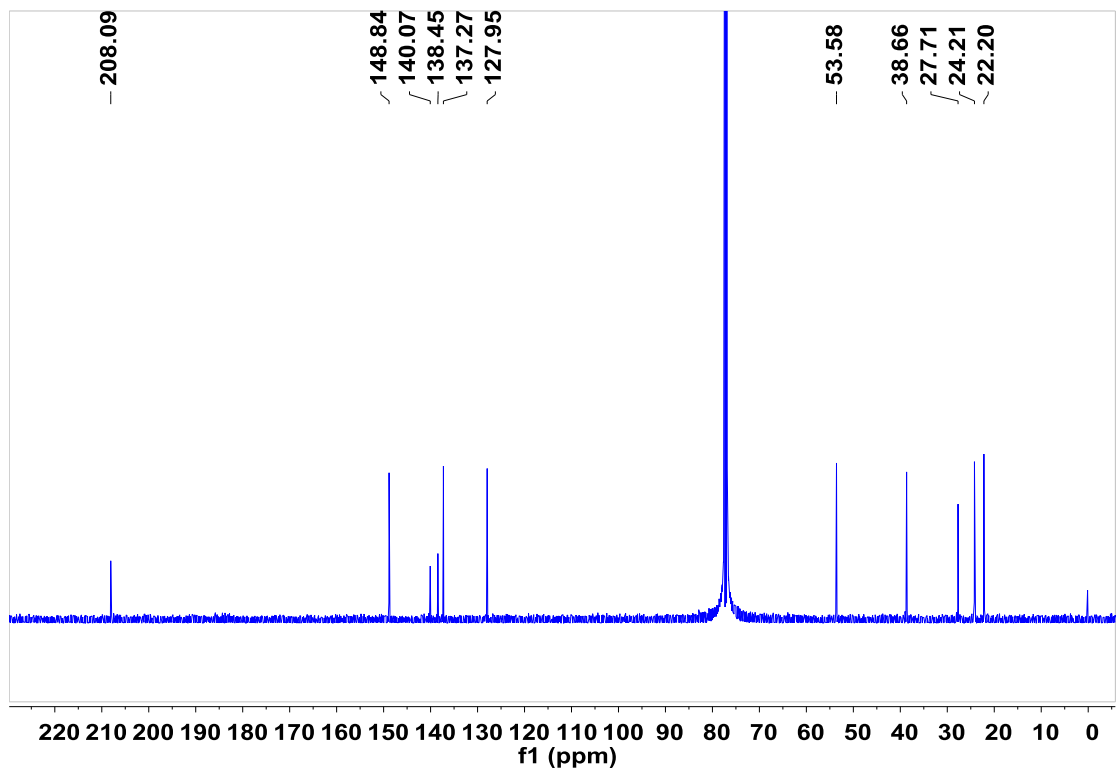

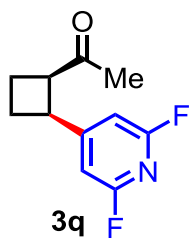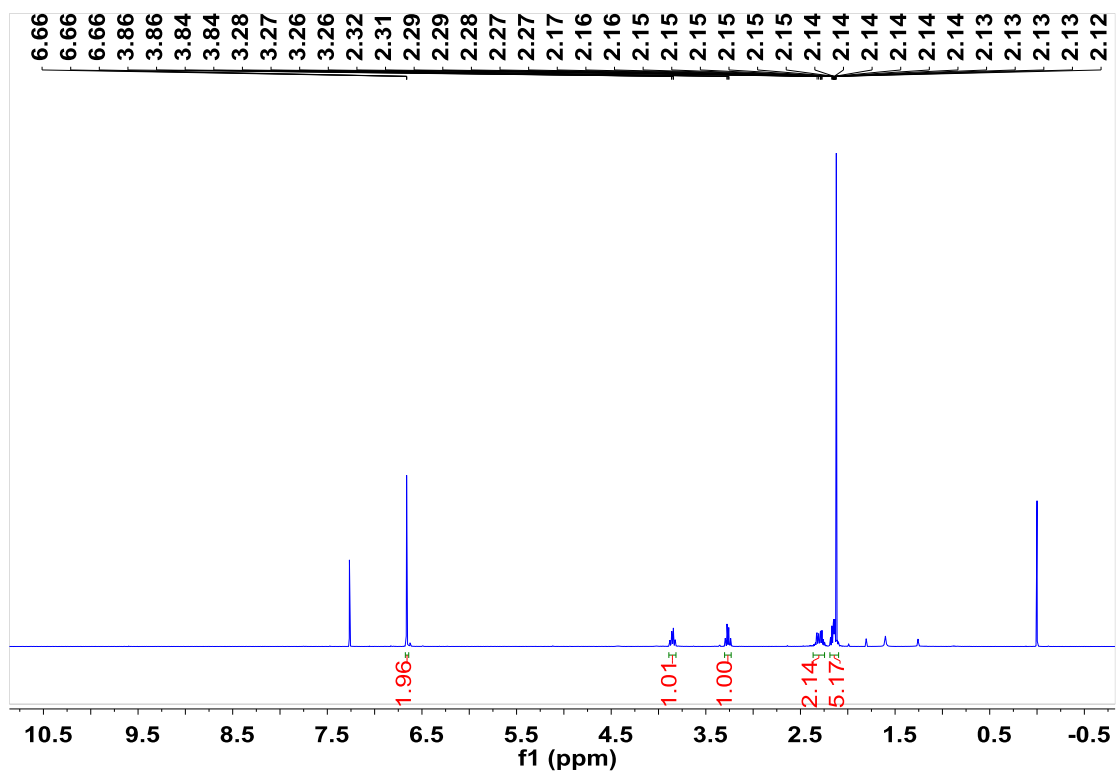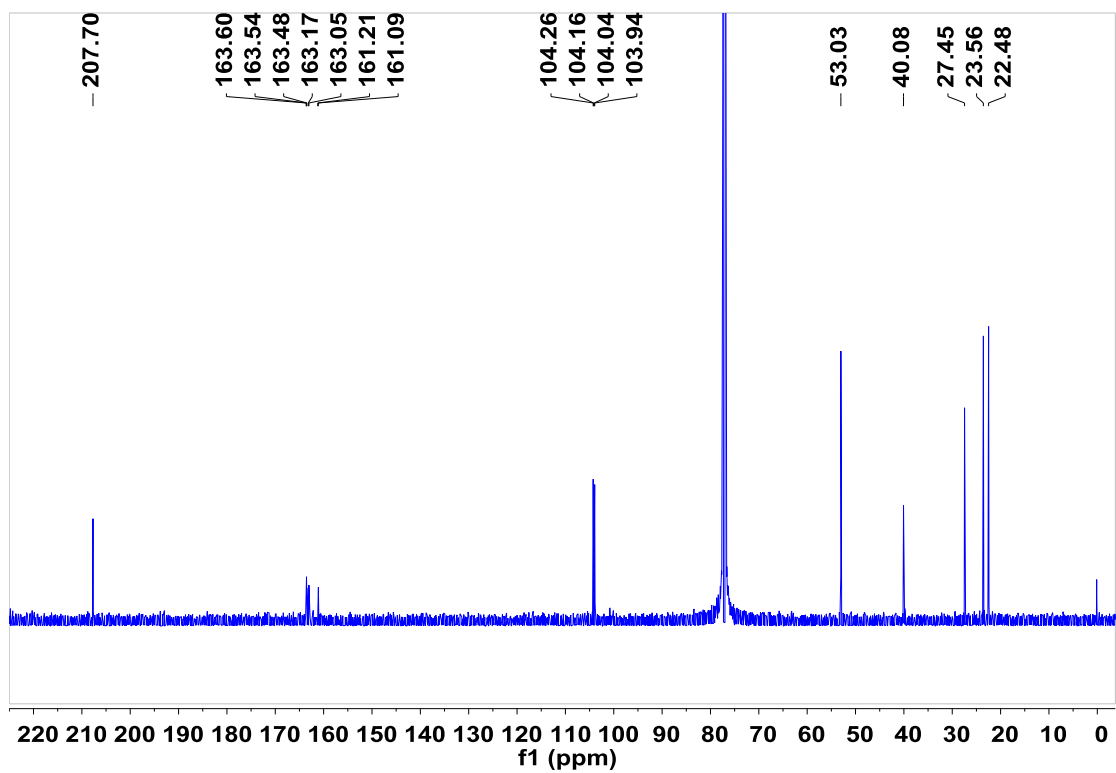

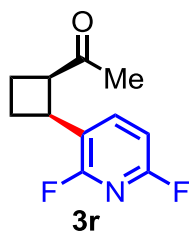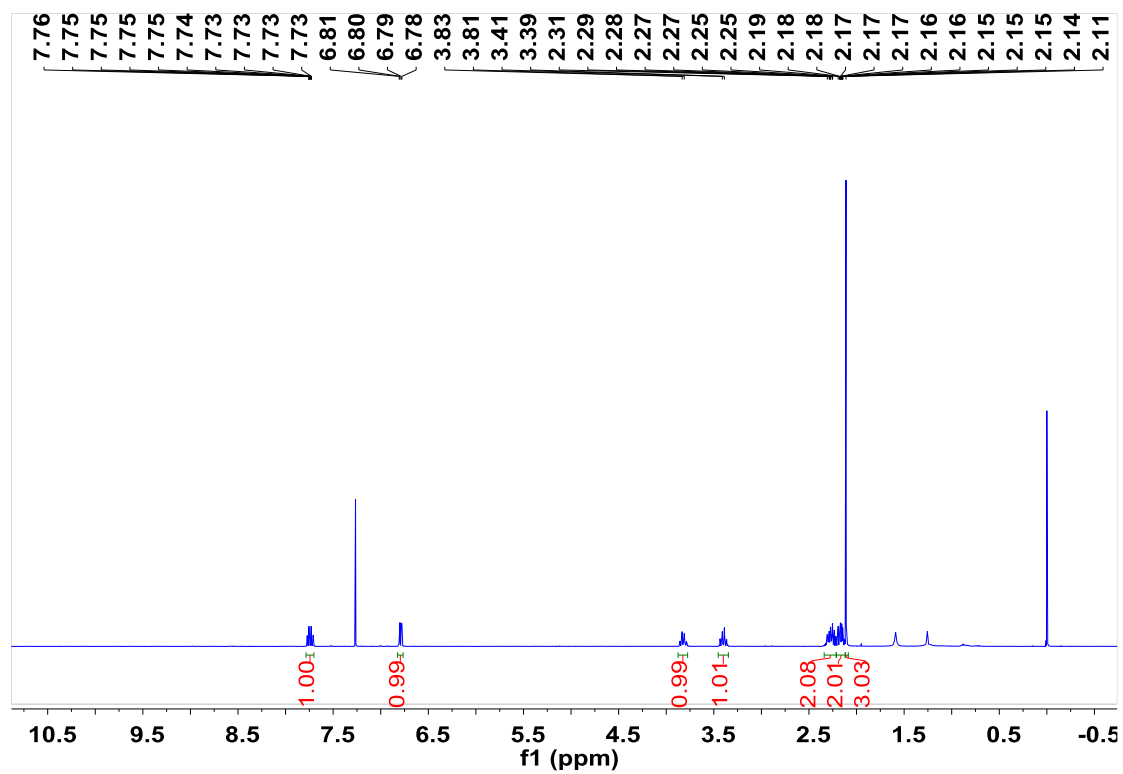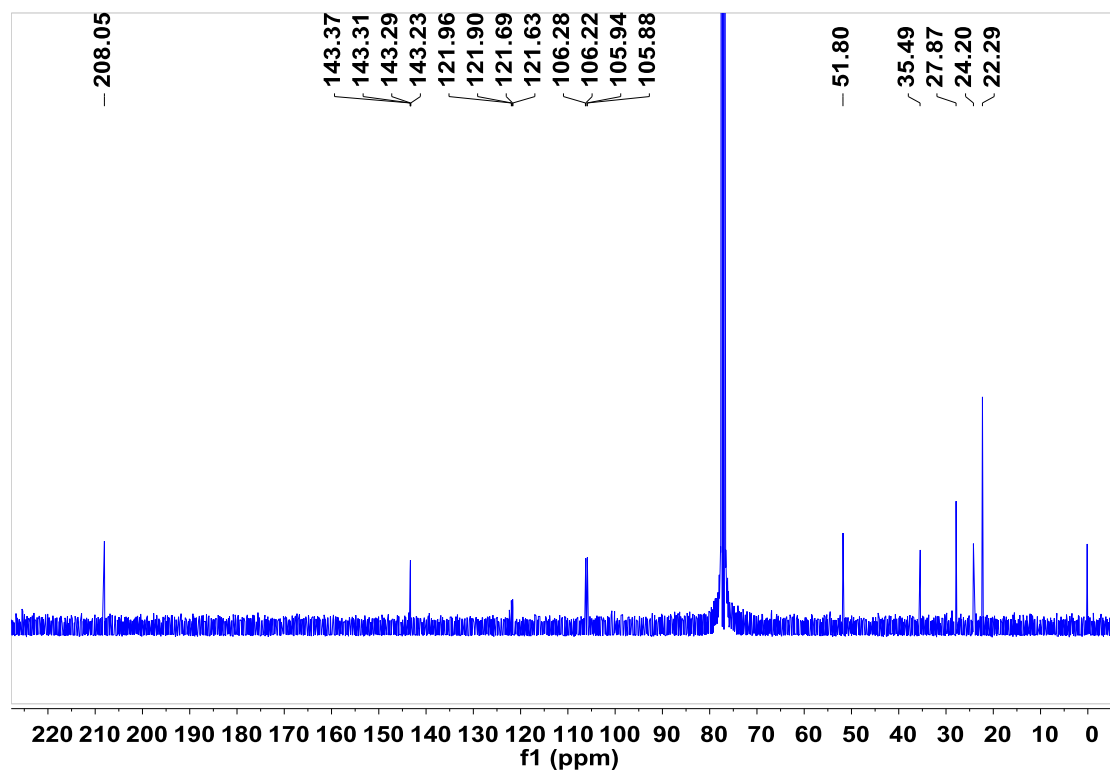

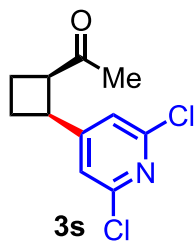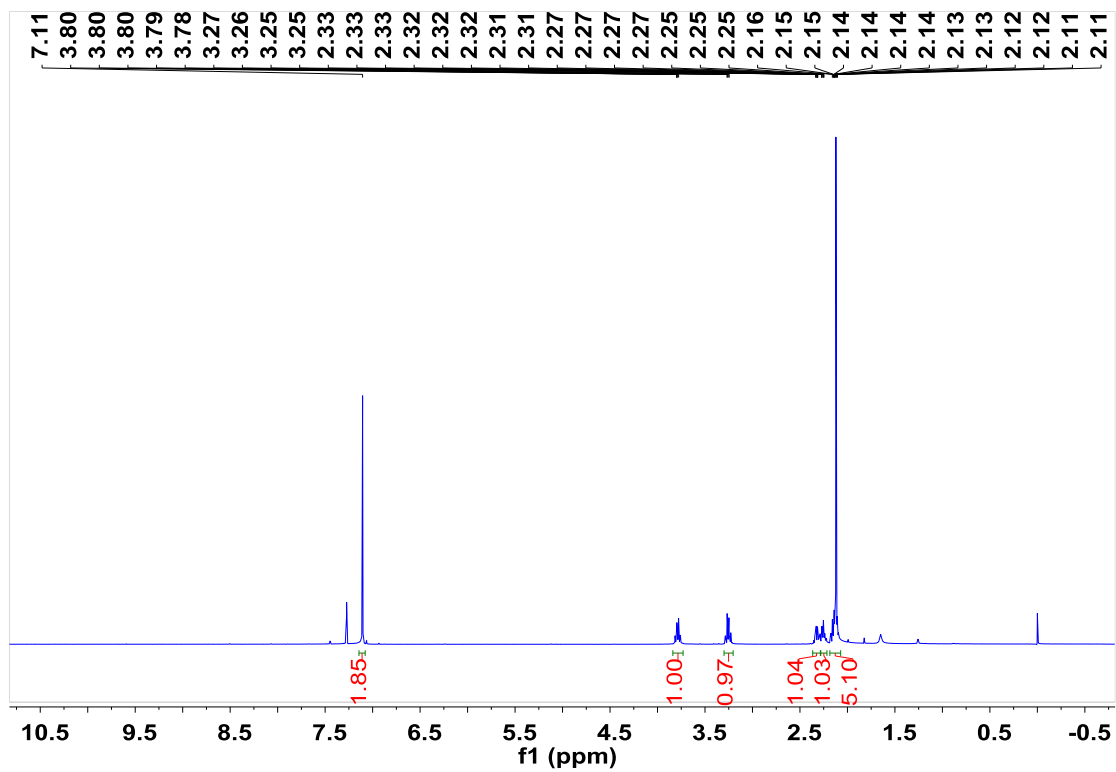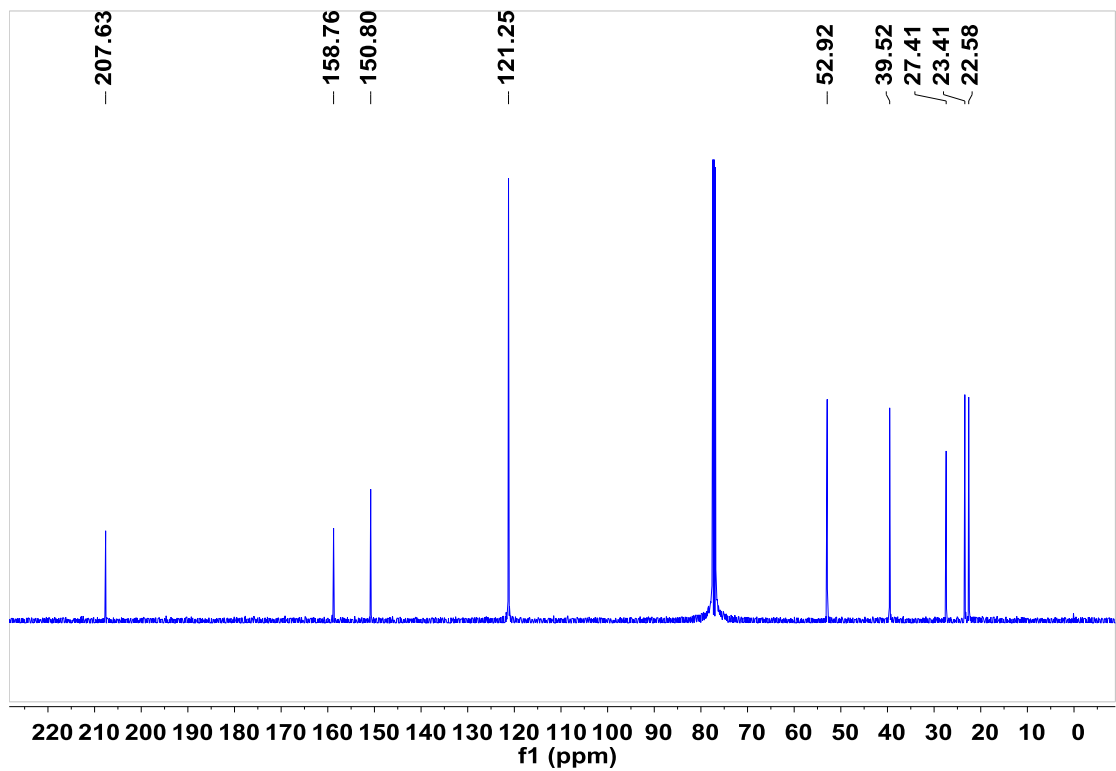

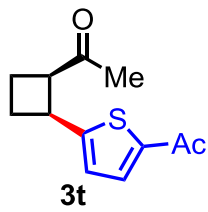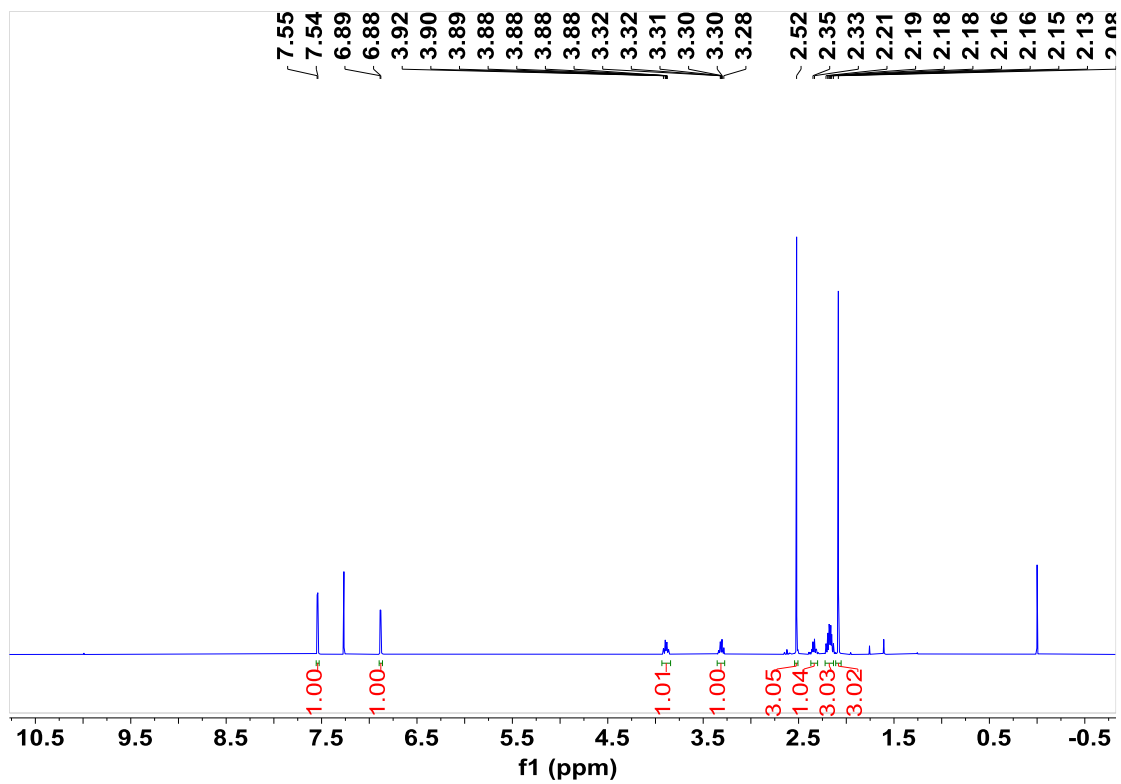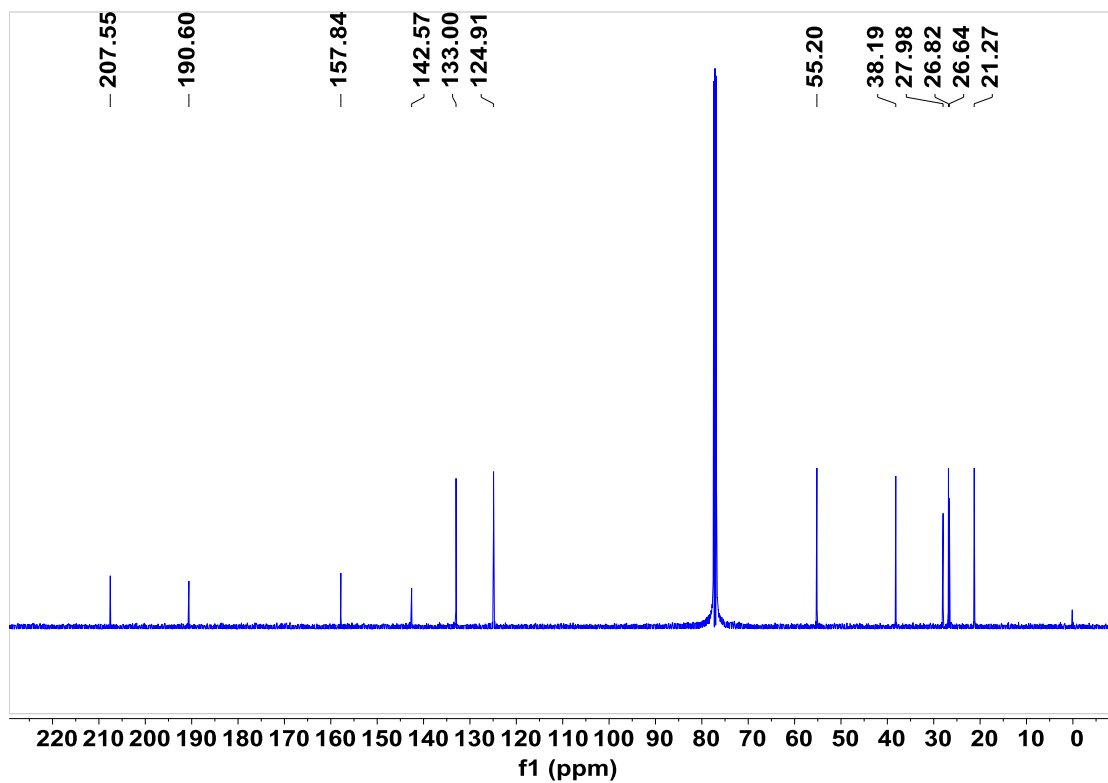

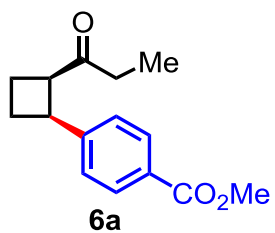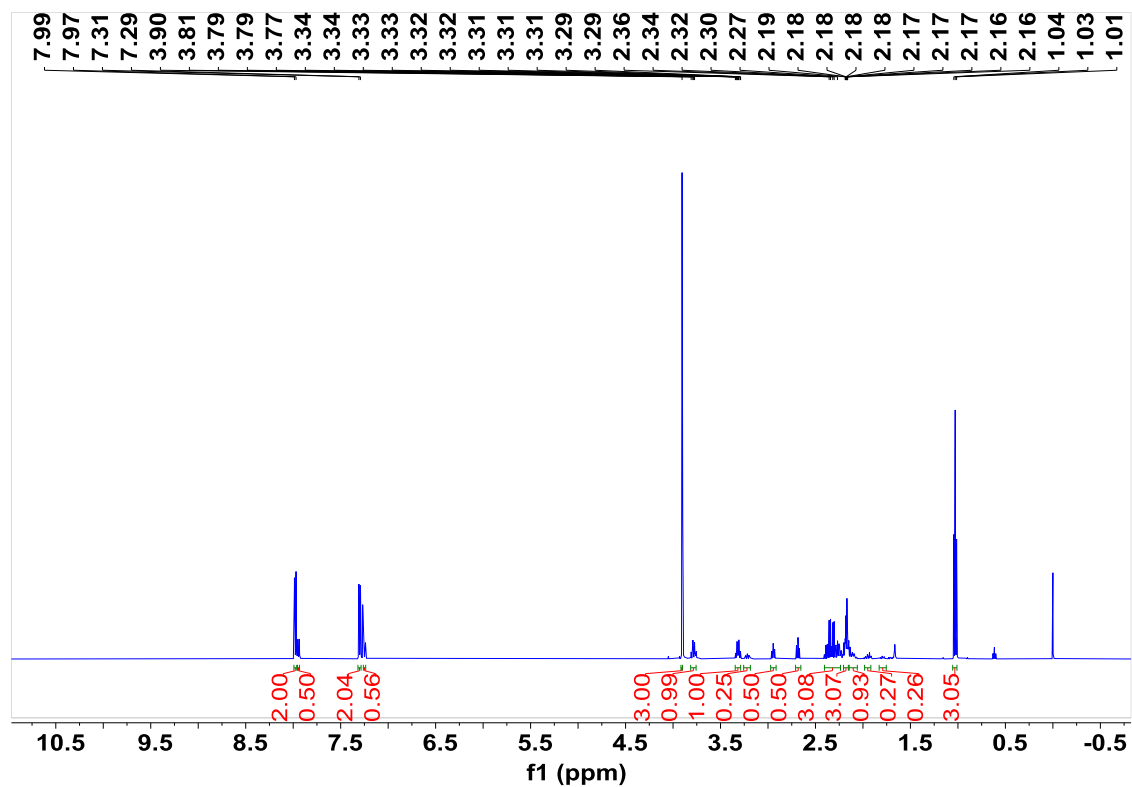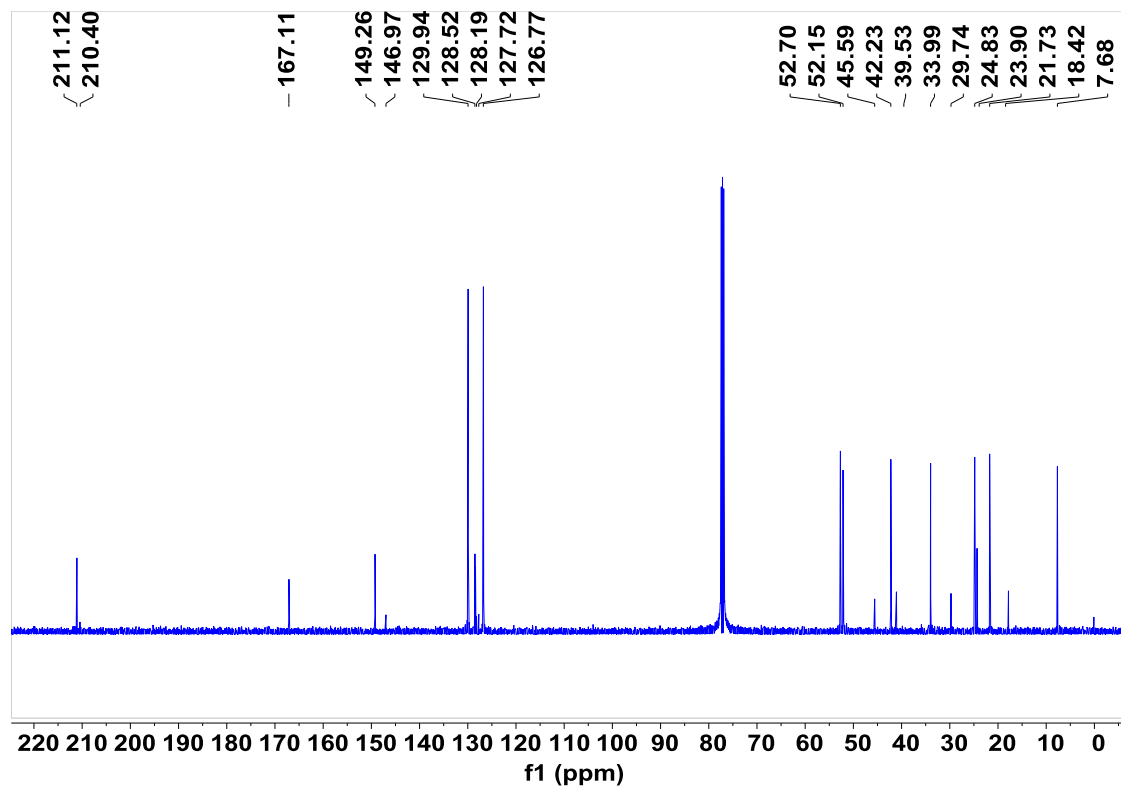



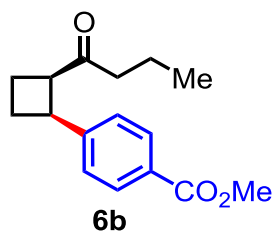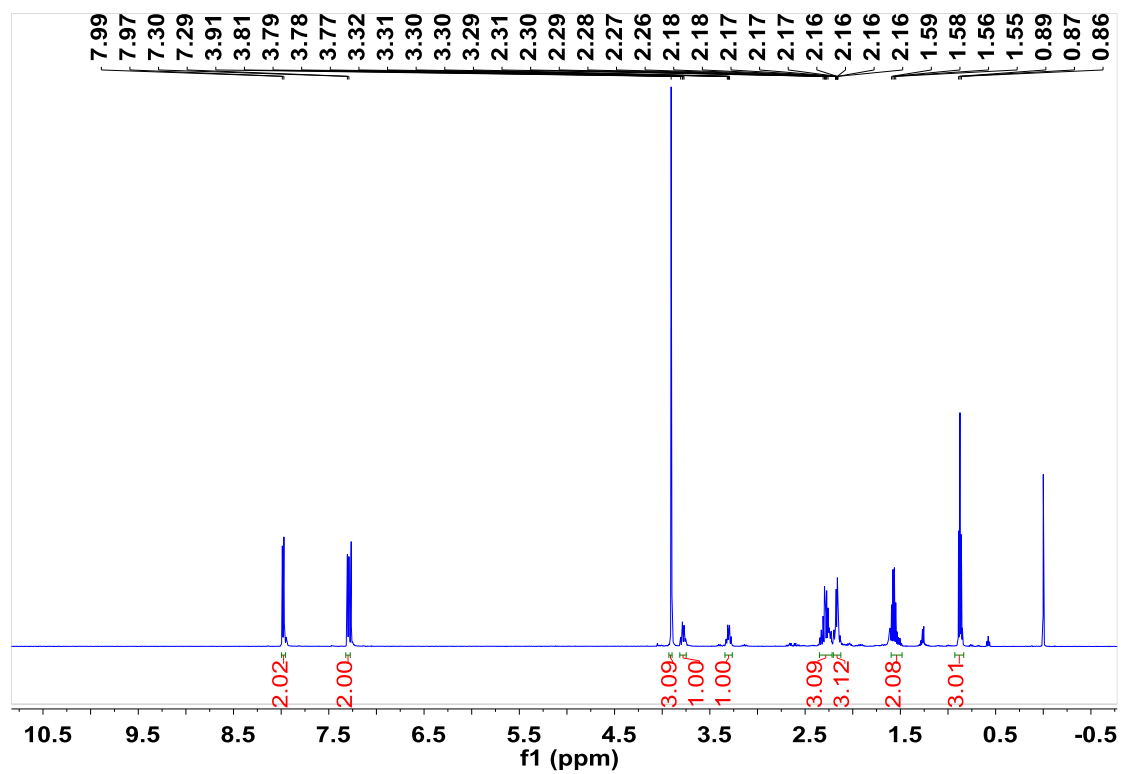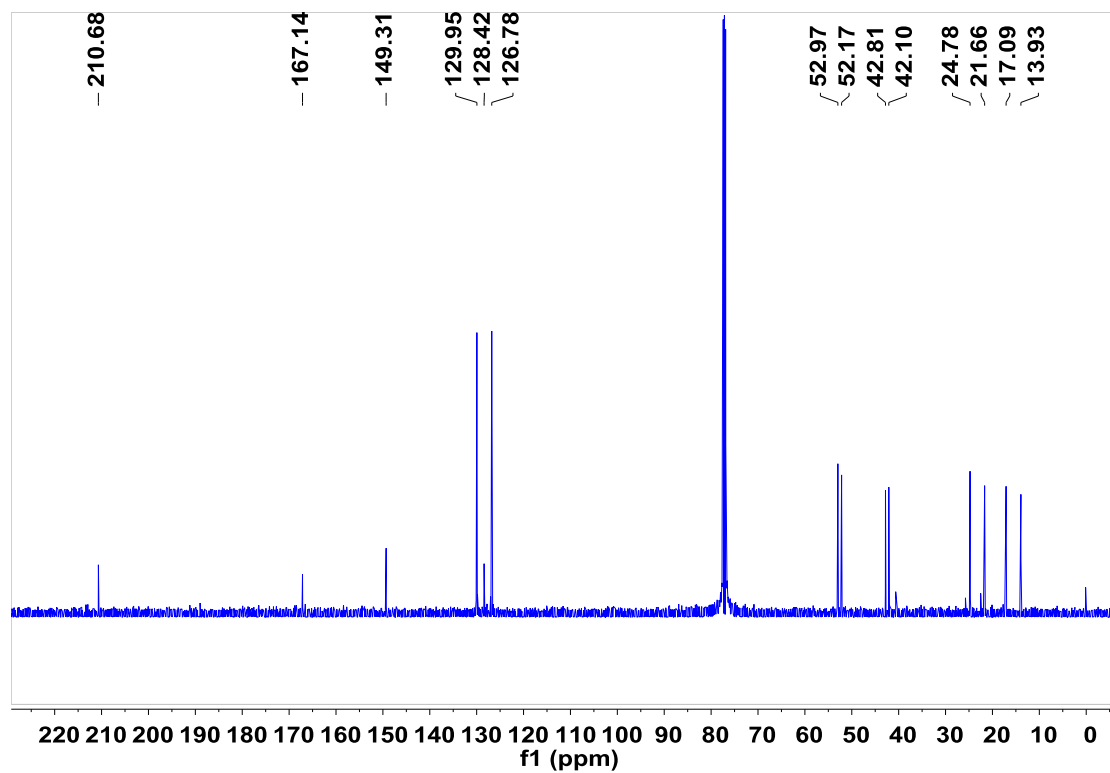

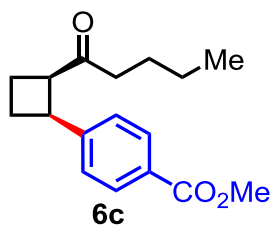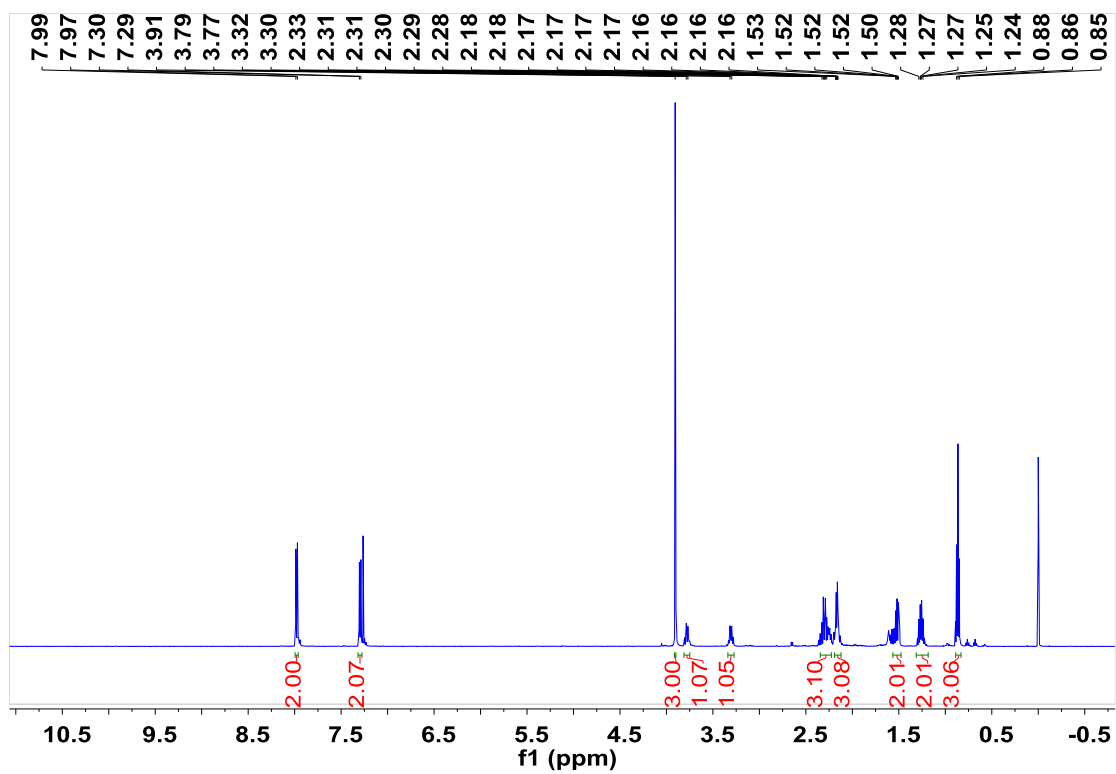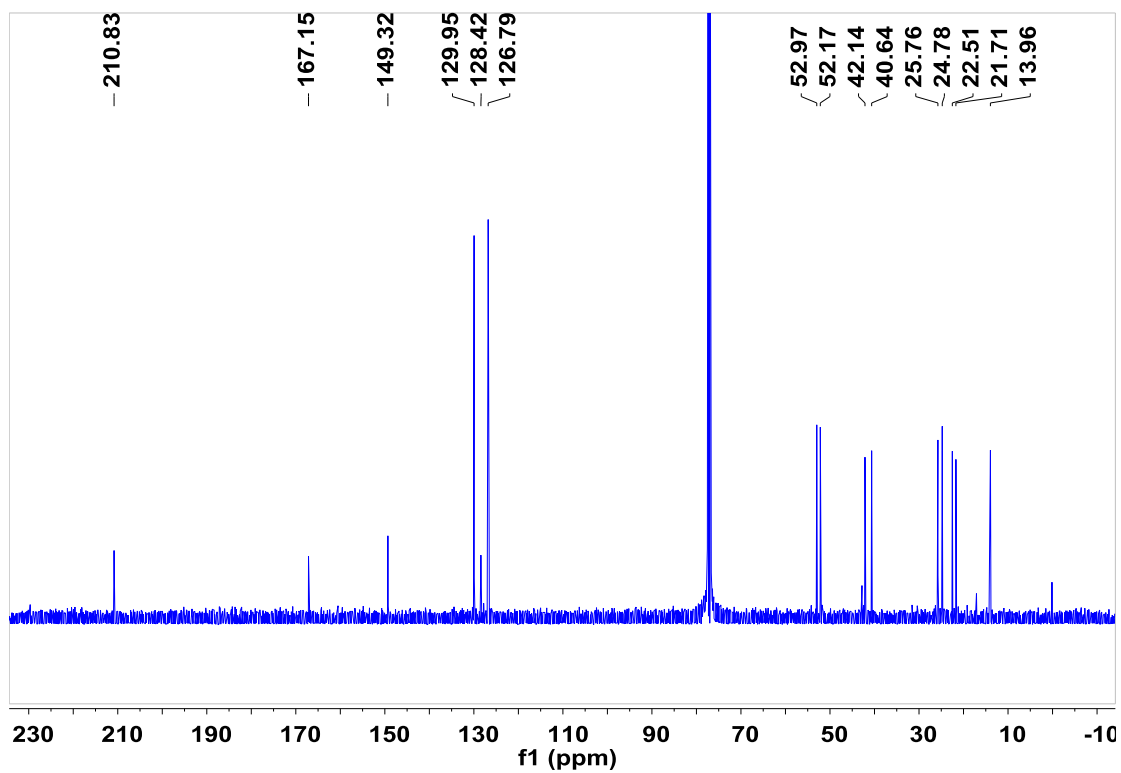

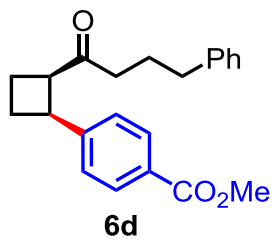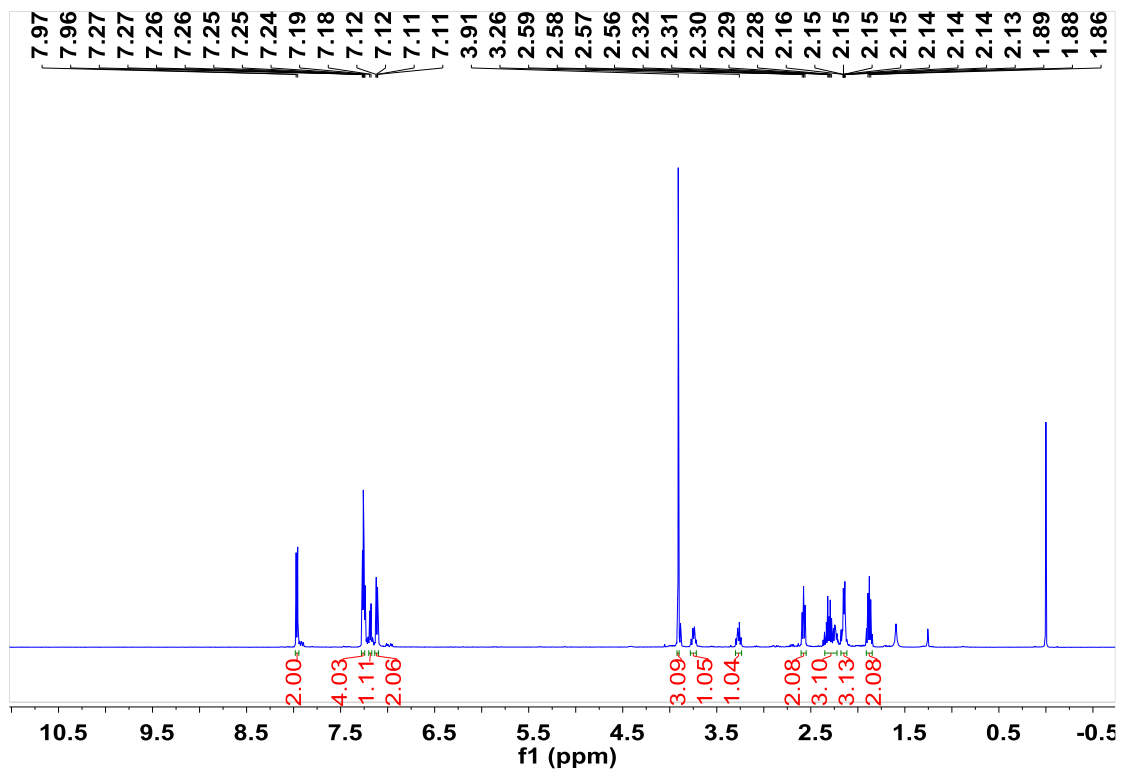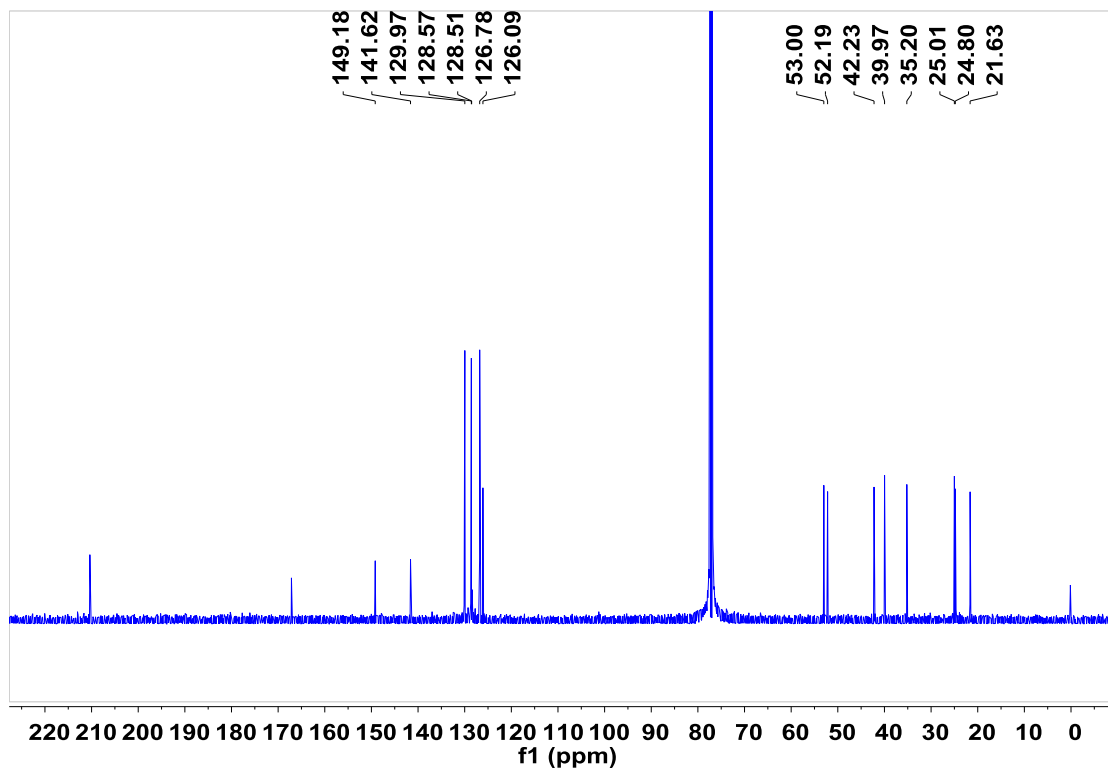

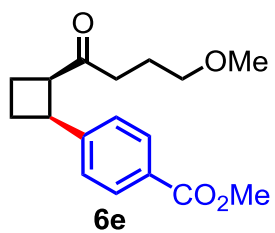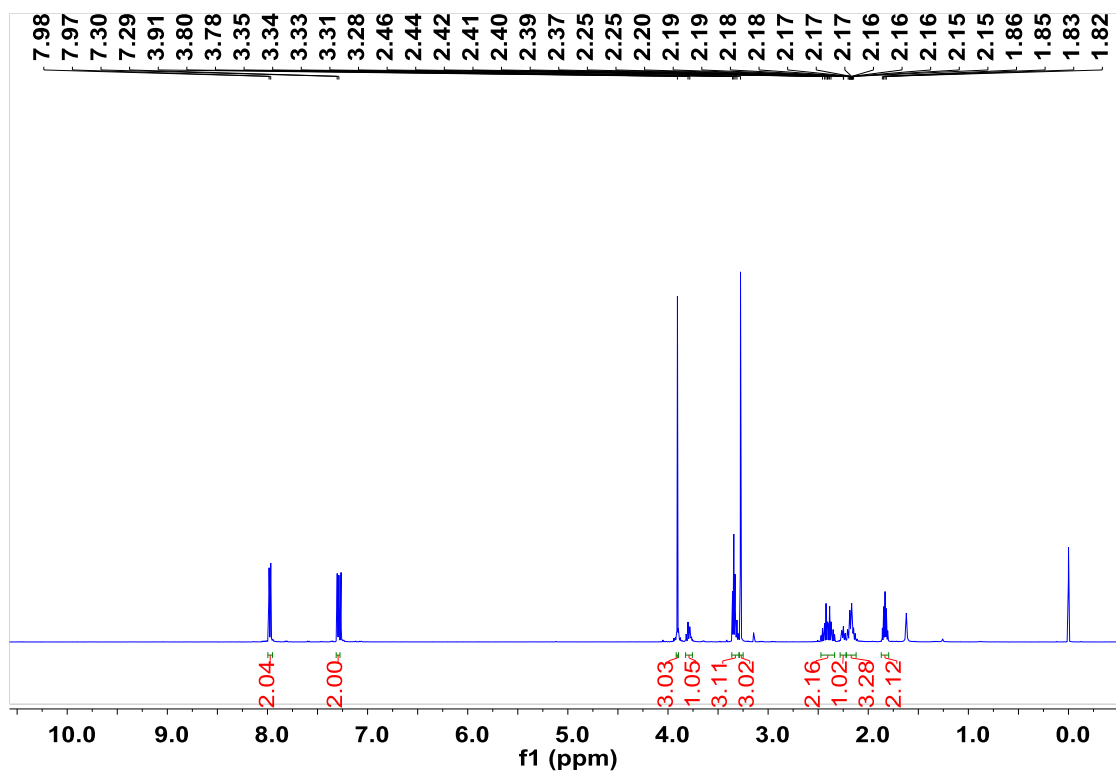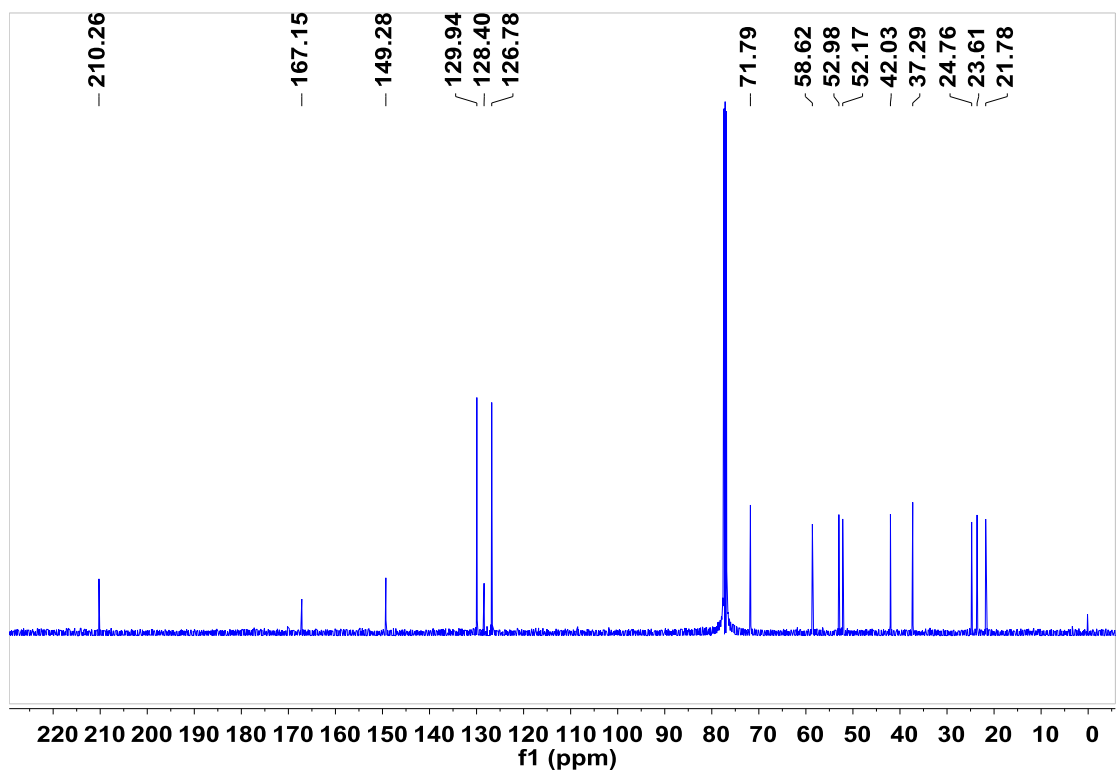

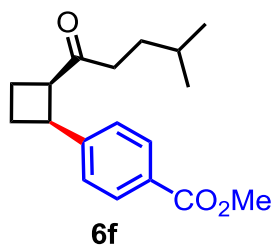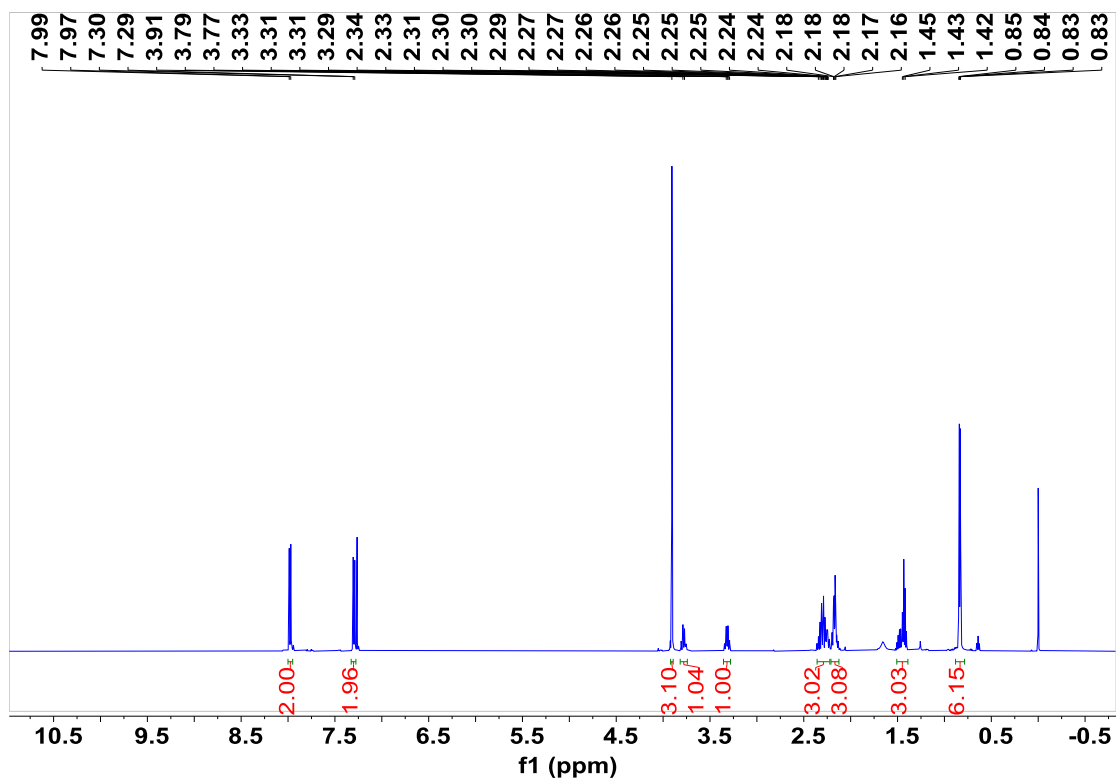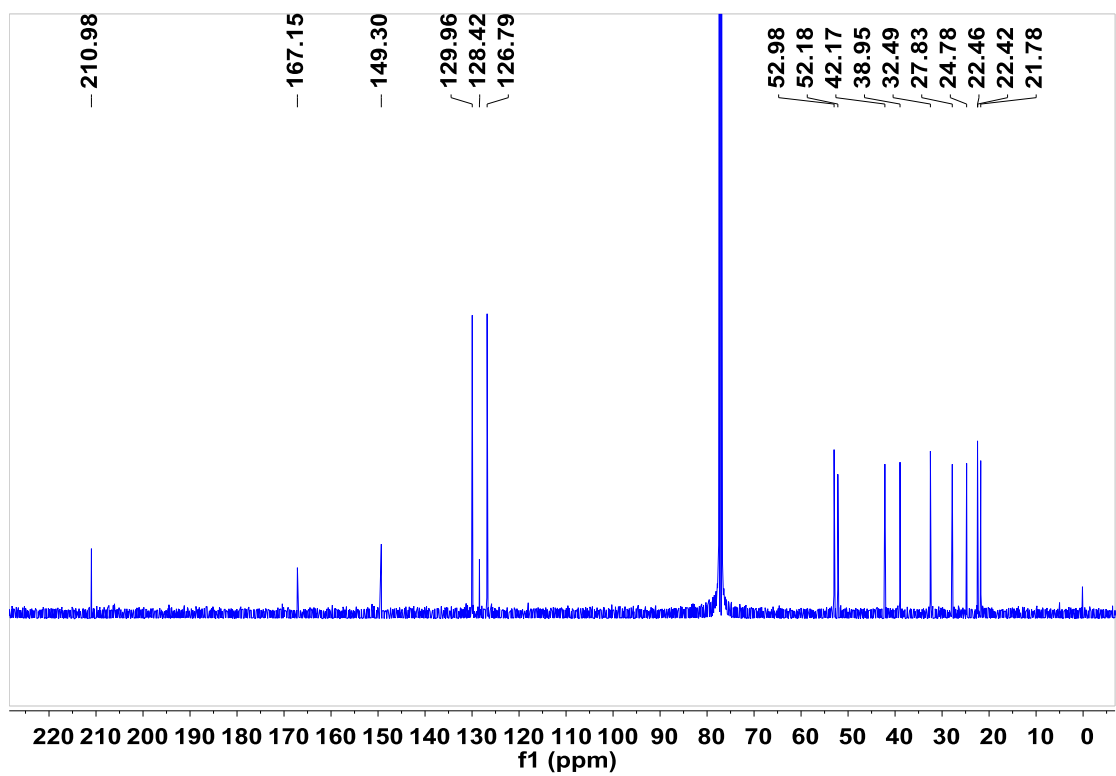

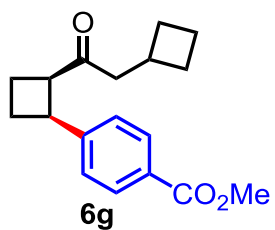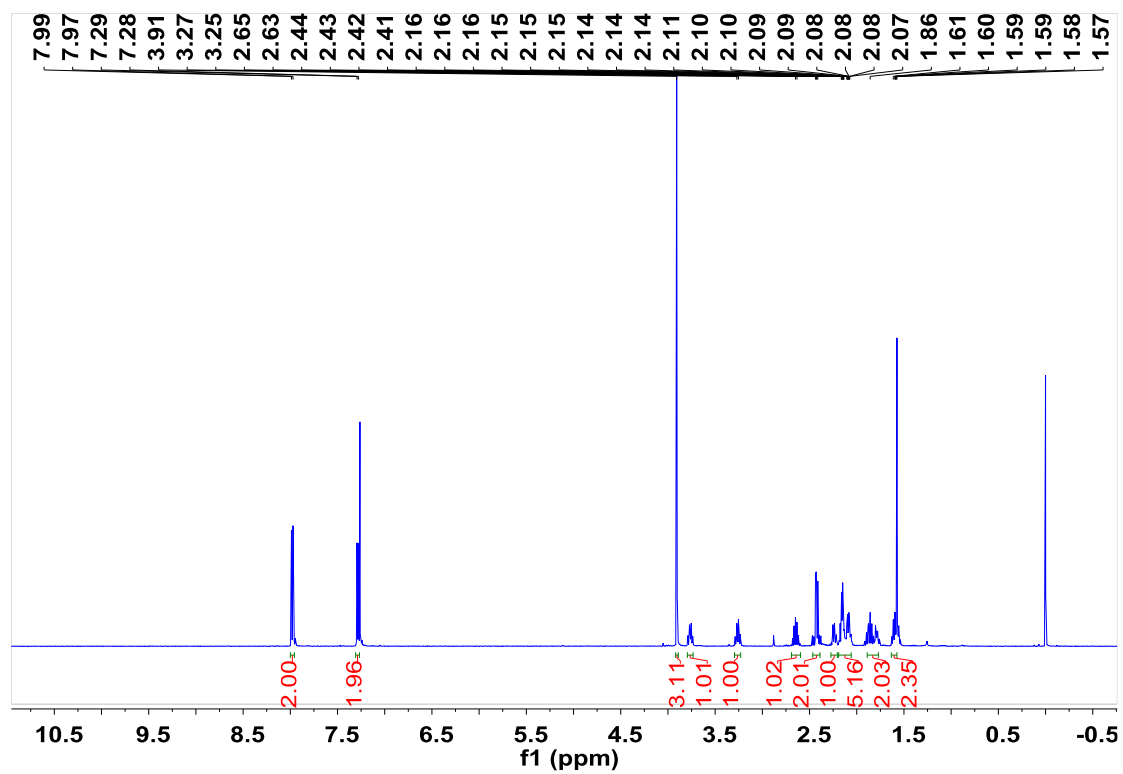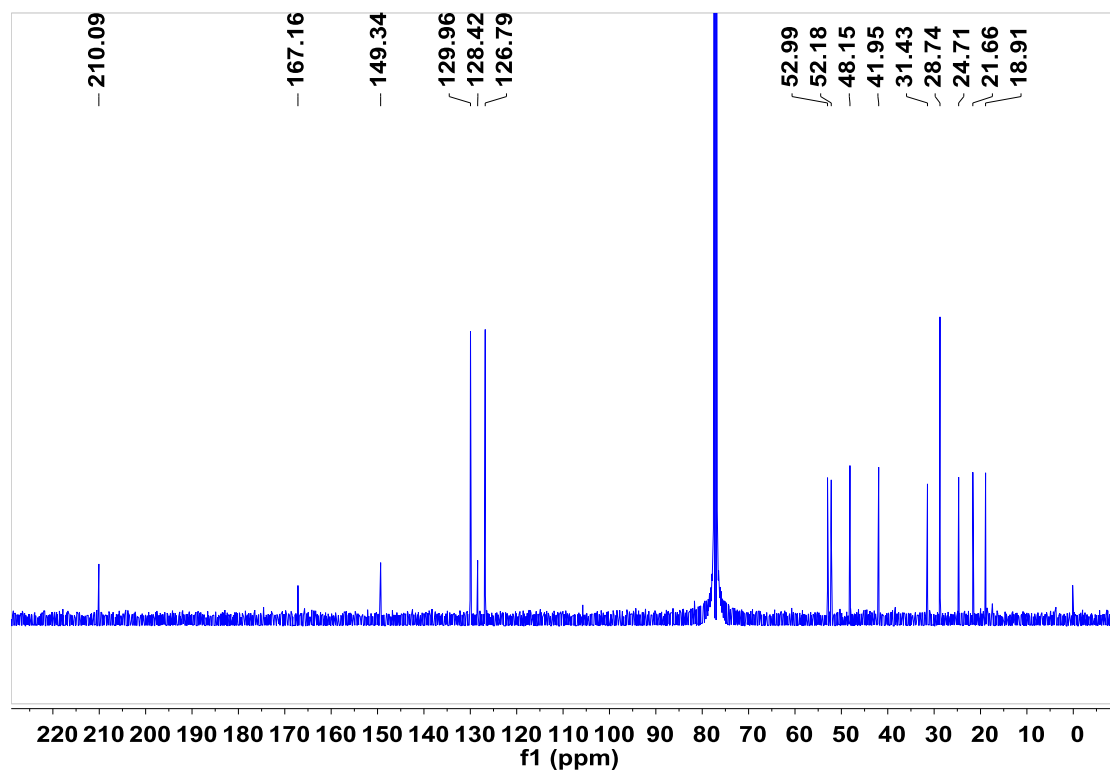

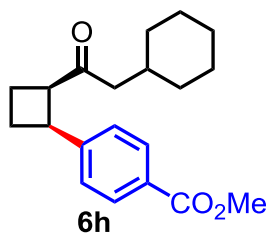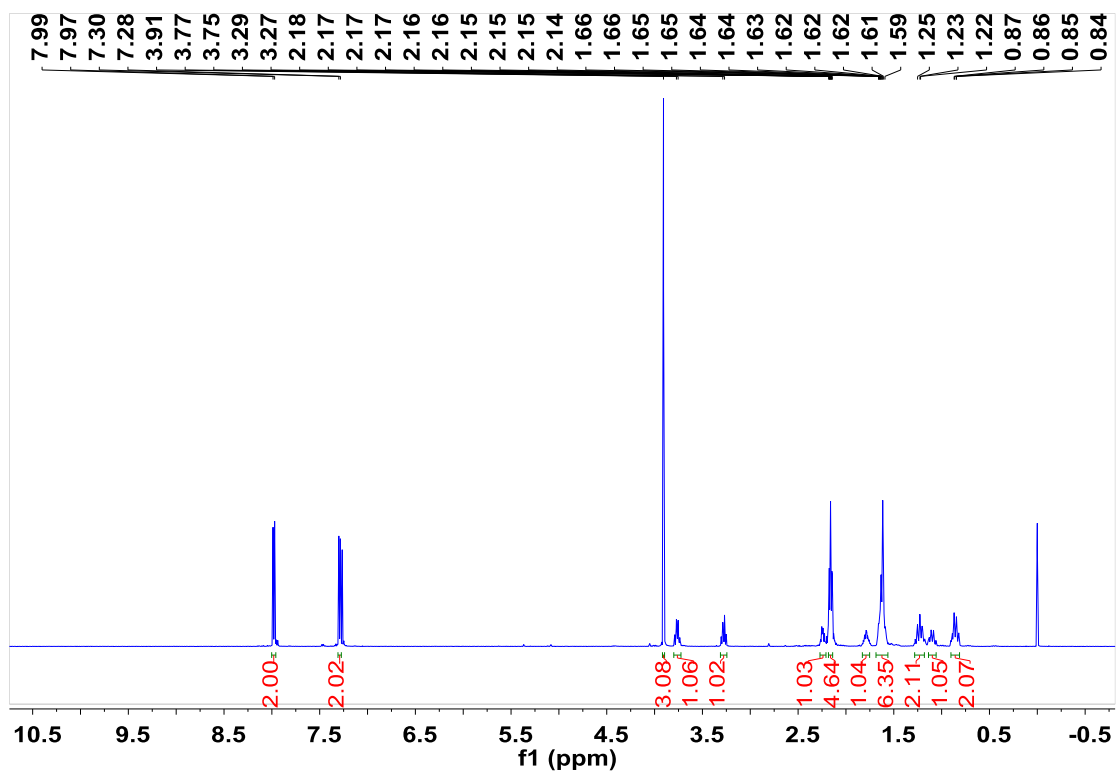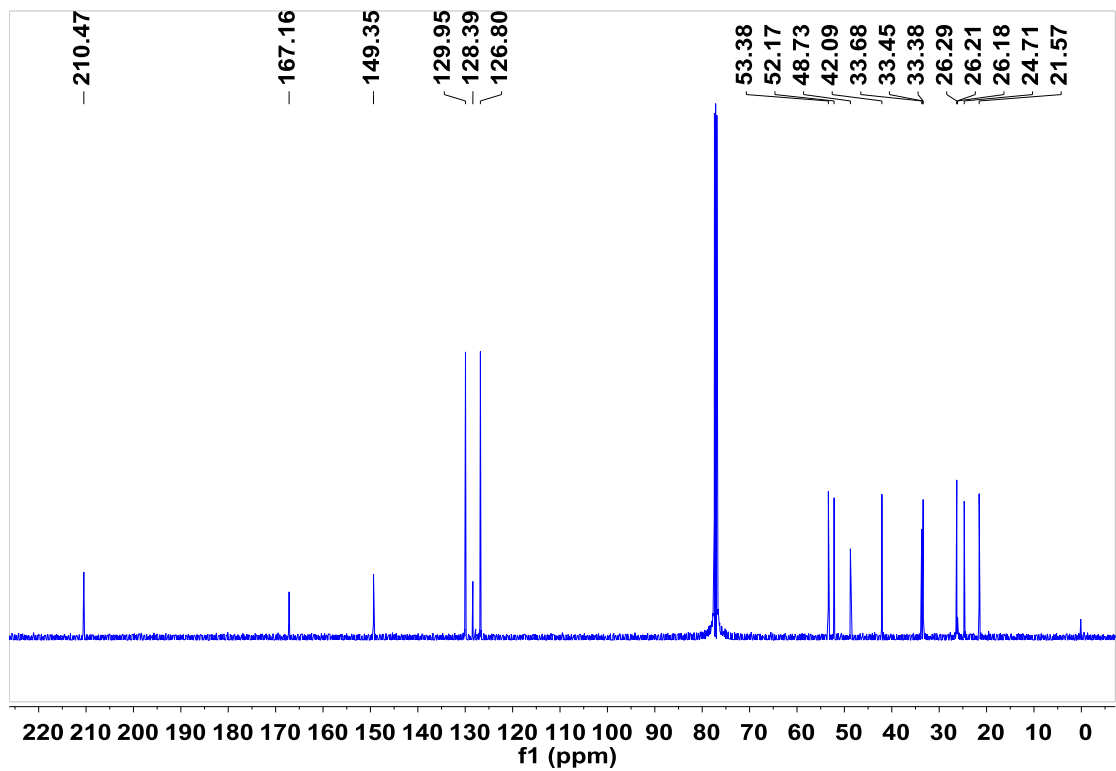

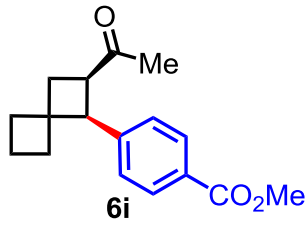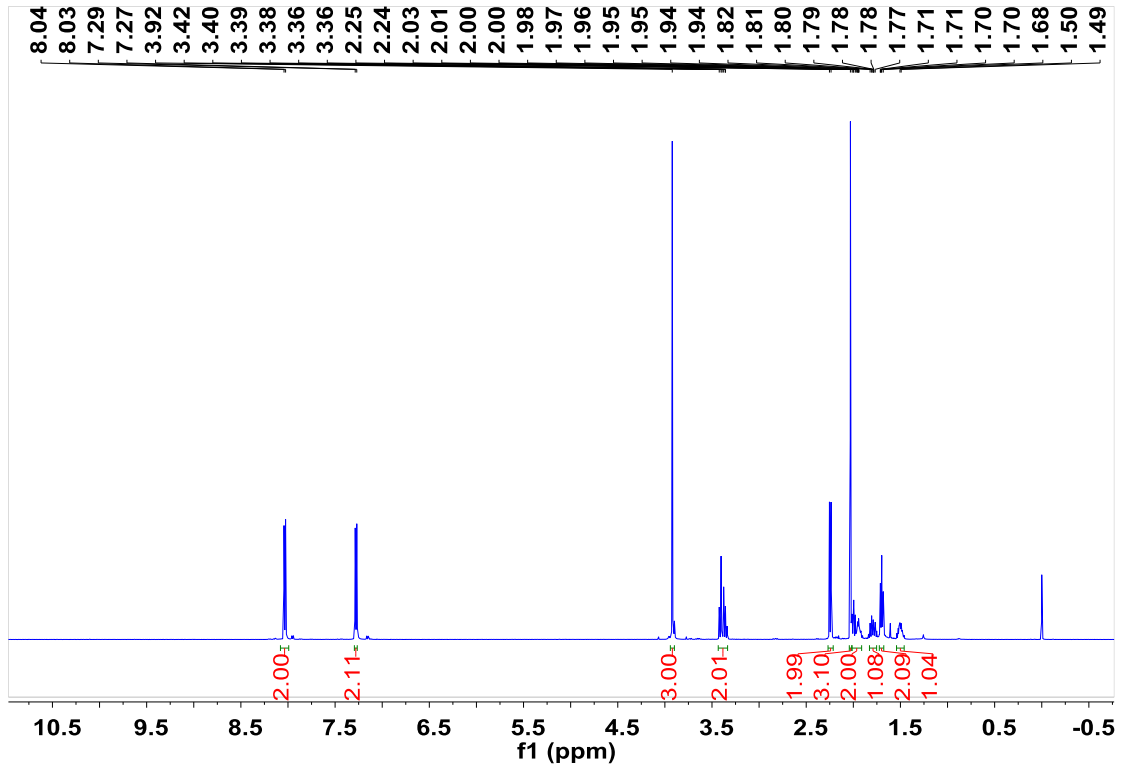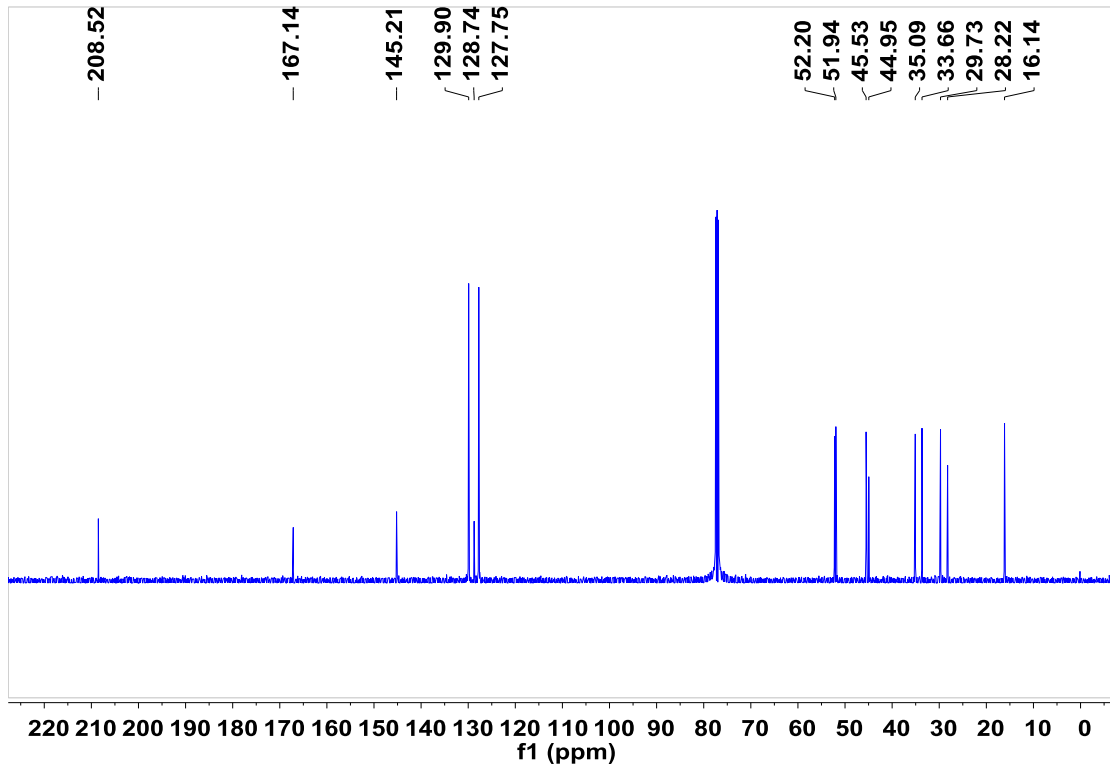



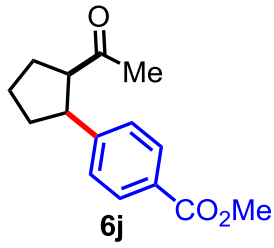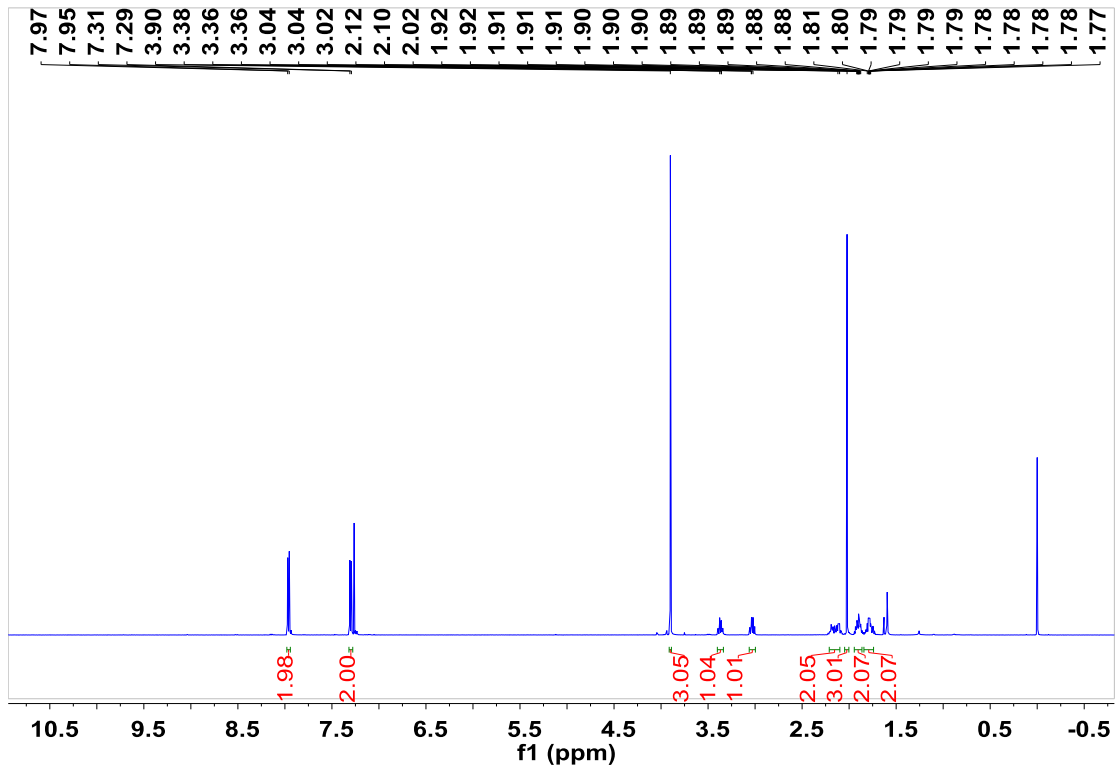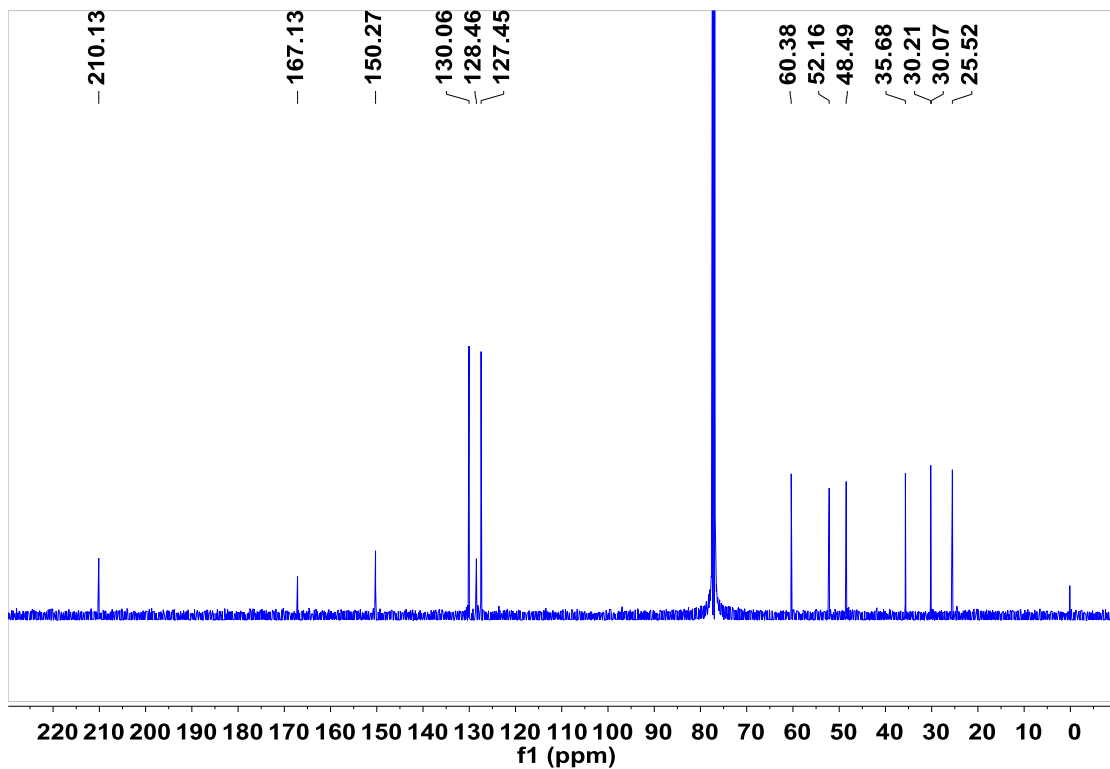

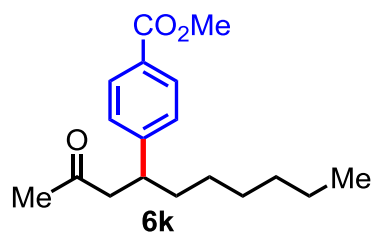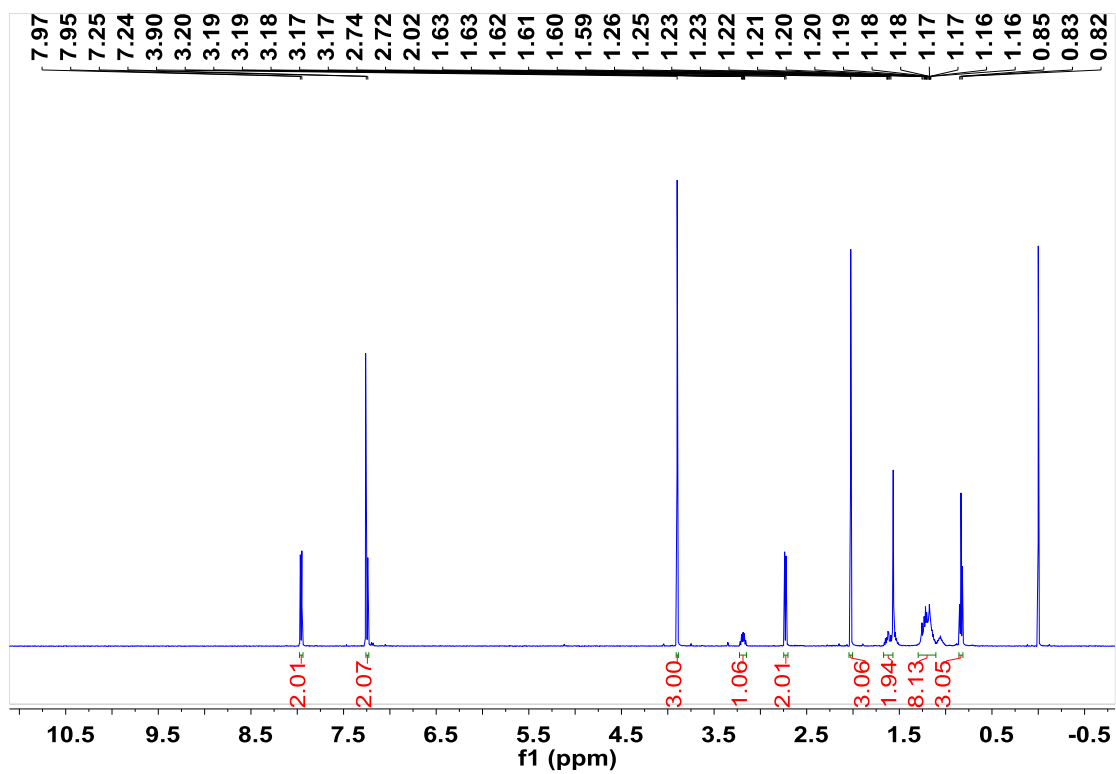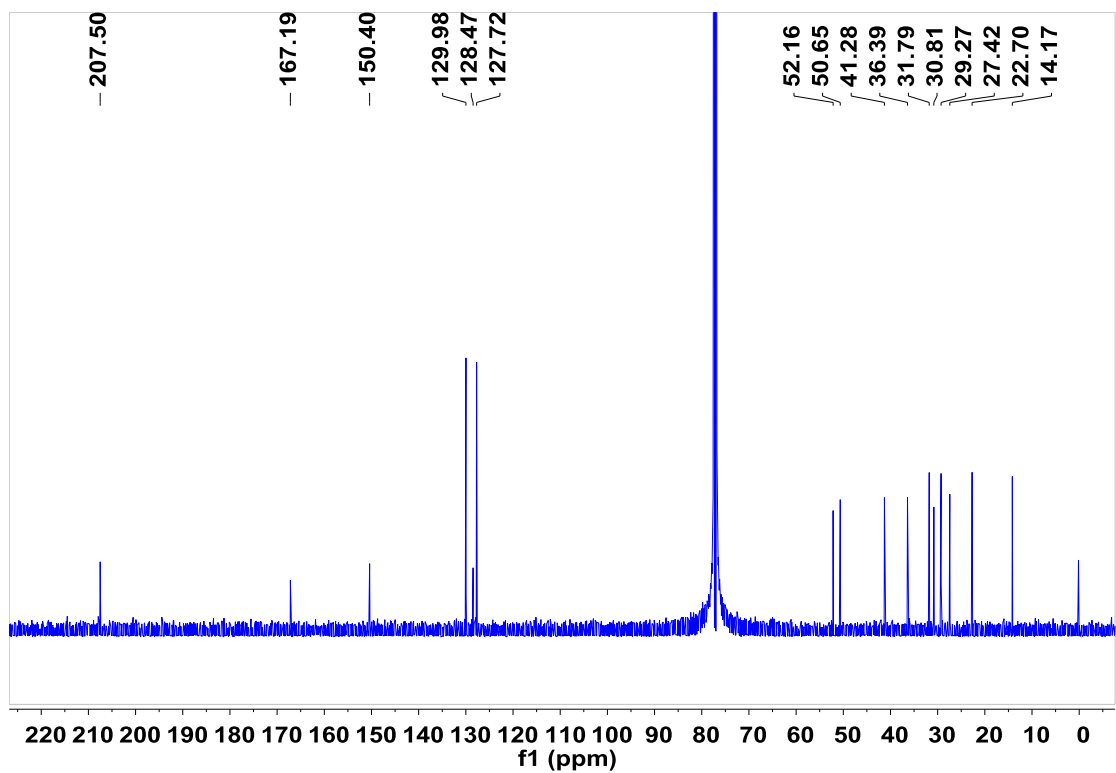

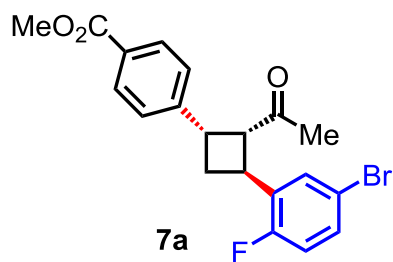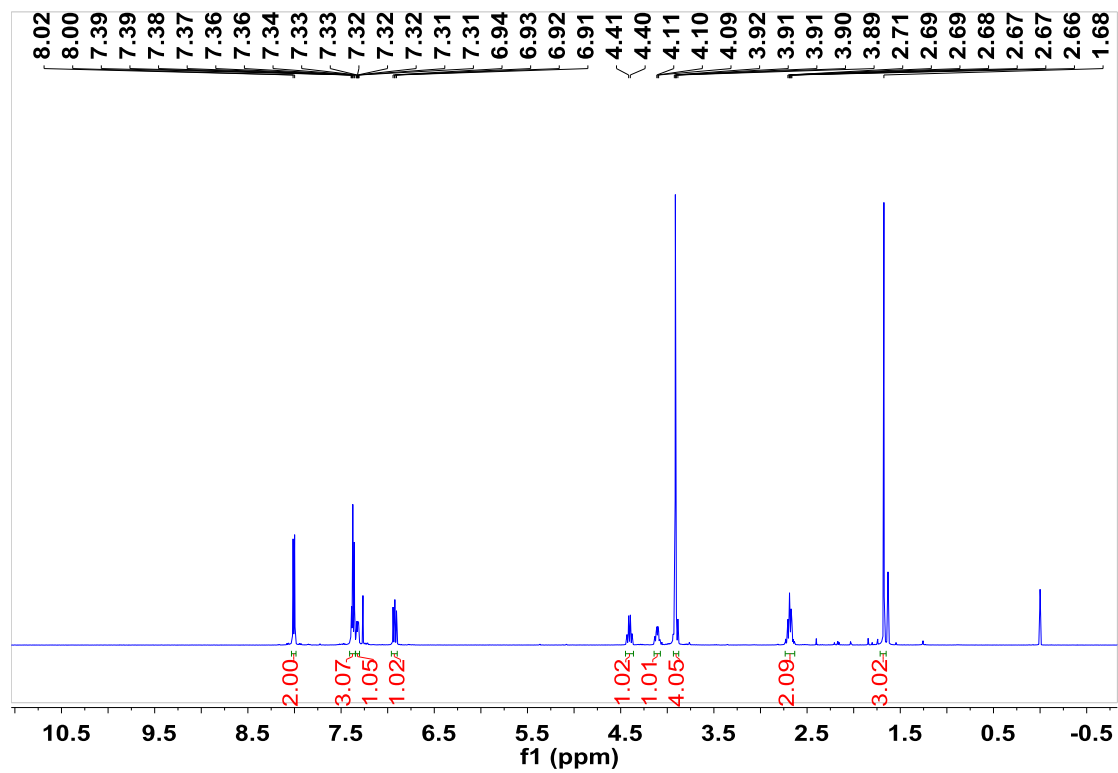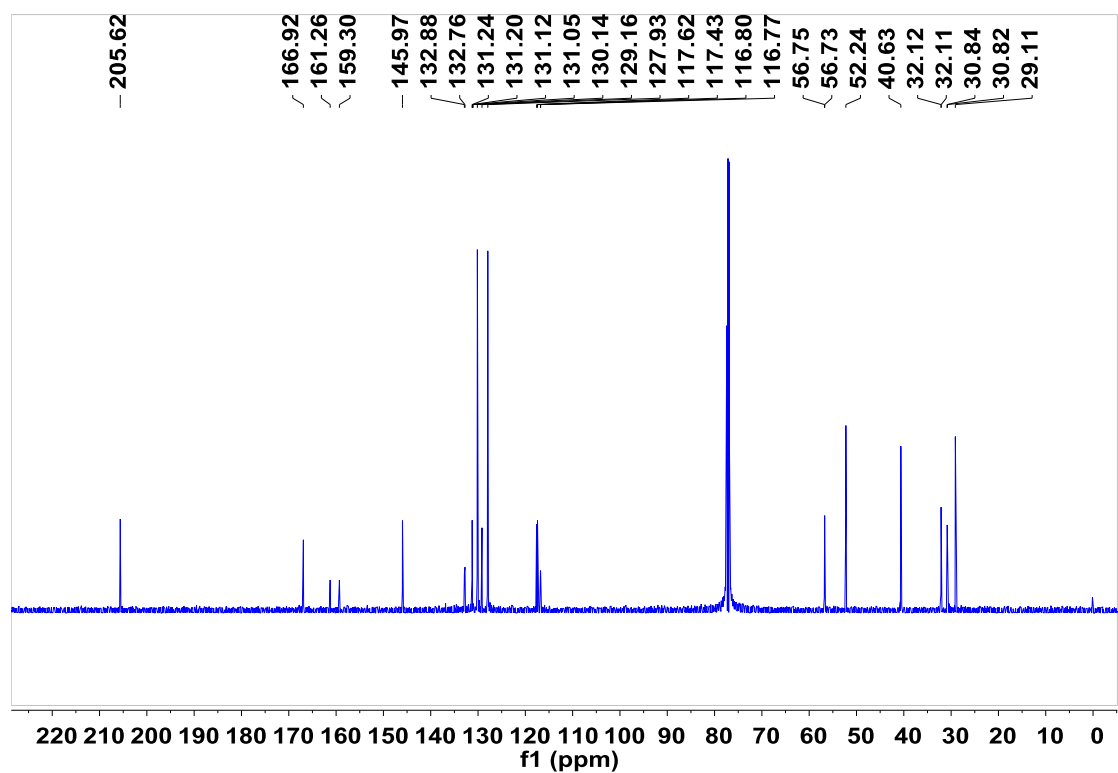

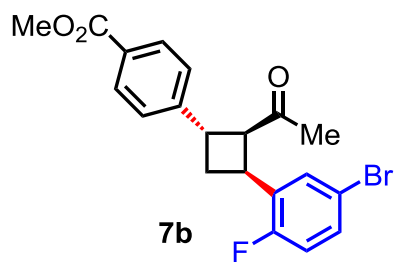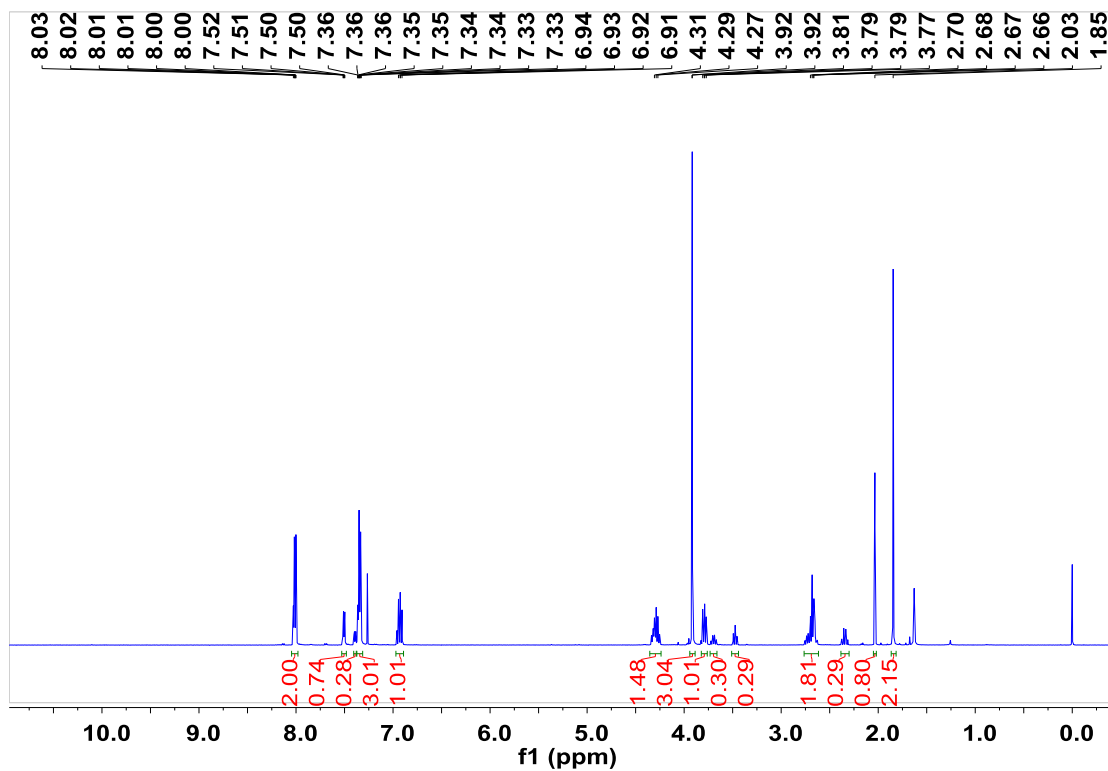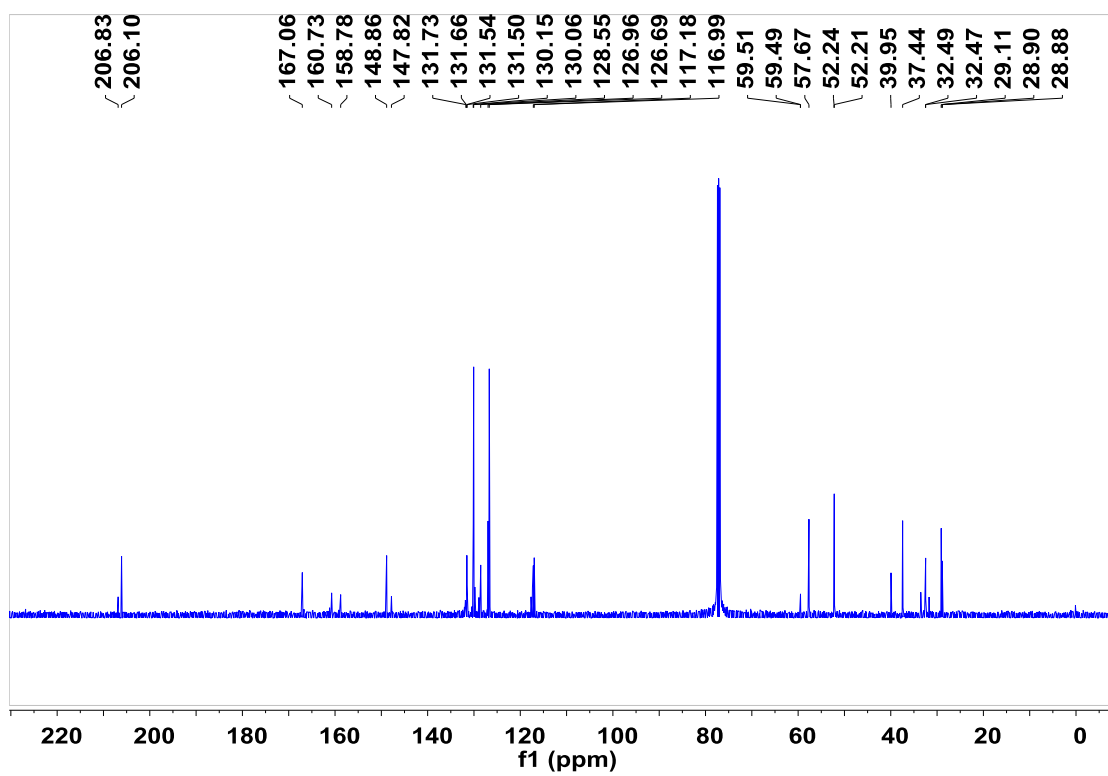



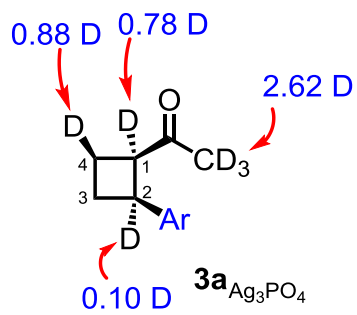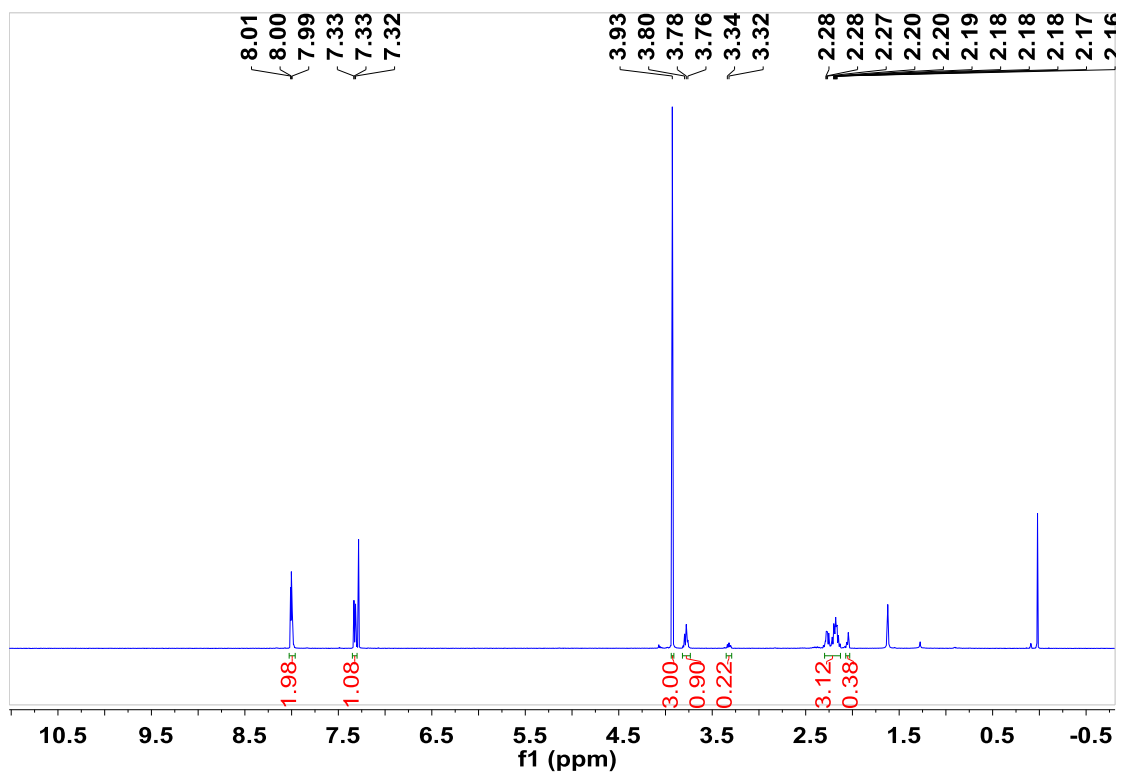

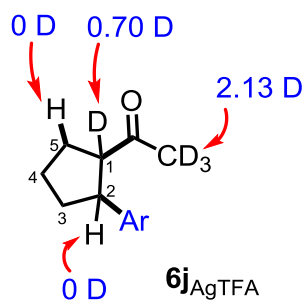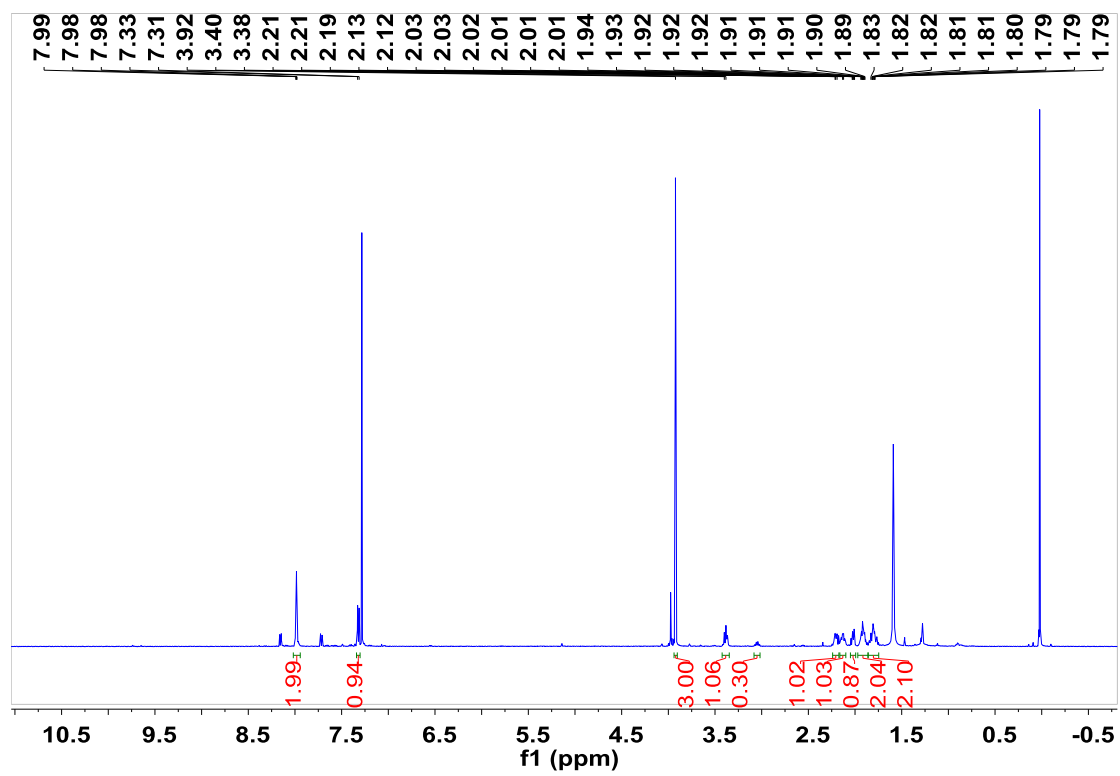

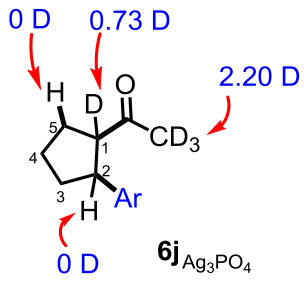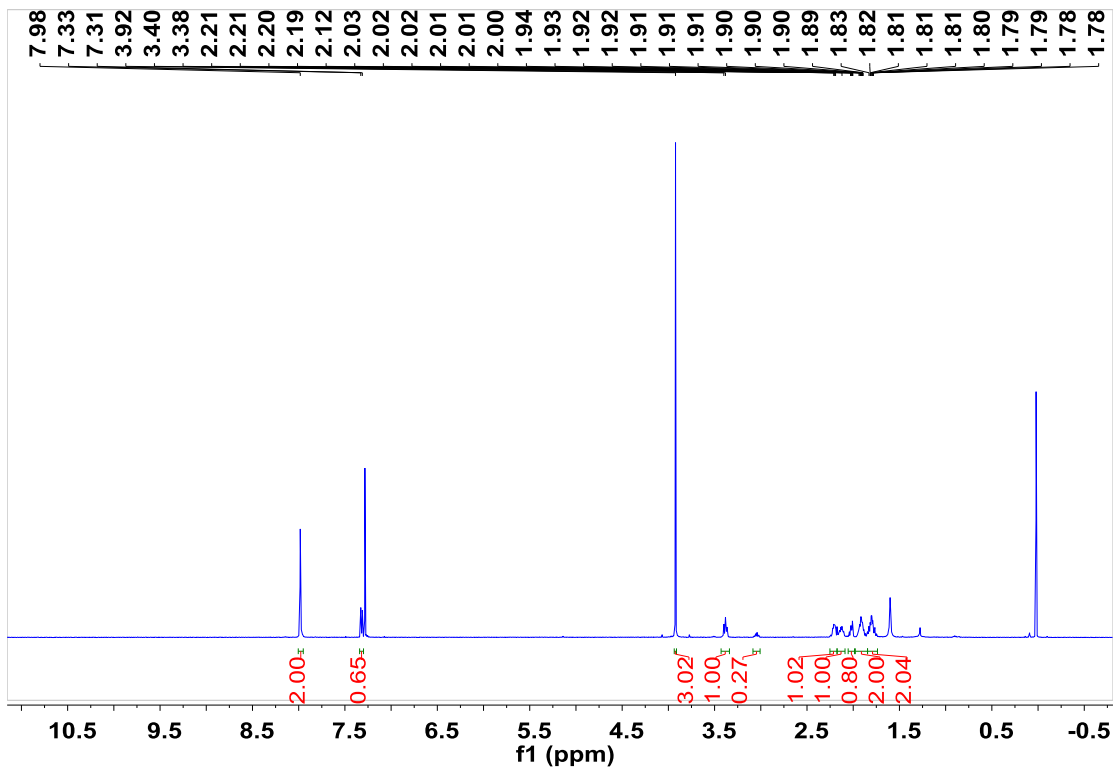



## 9. HPLC Data

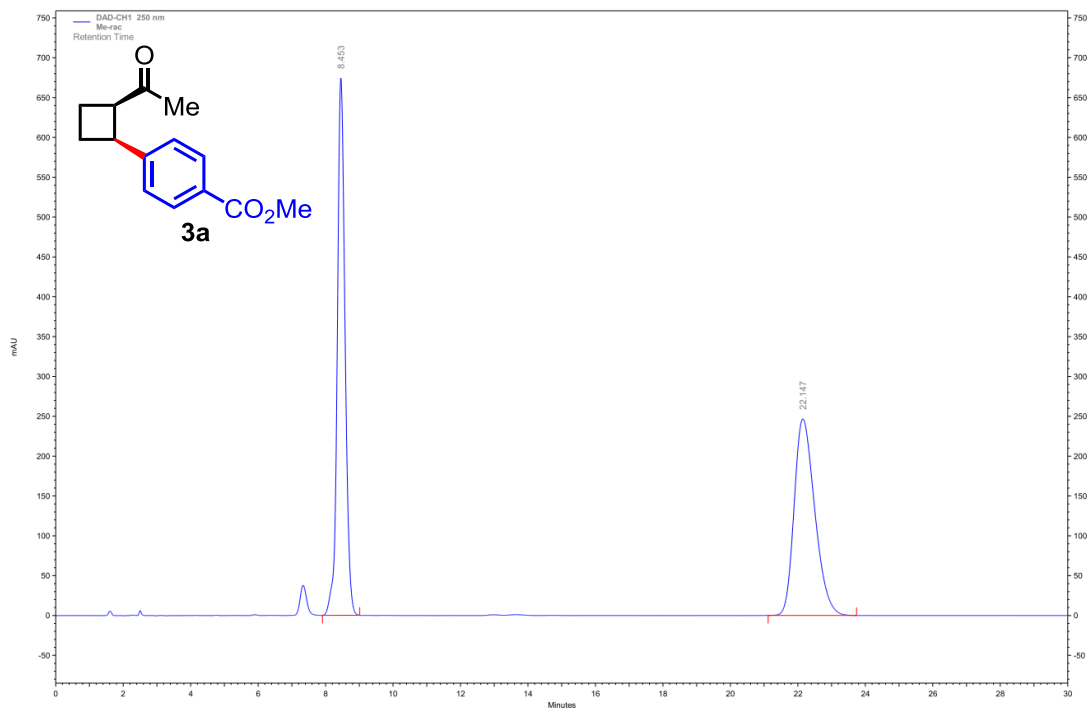

### DAD-CH1 250 nm Results

| Retention Time | Area     | Area % |
|----------------|----------|--------|
| 8.453          | 43106209 | 50.73  |
| 22.147         | 41870252 | 49.27  |

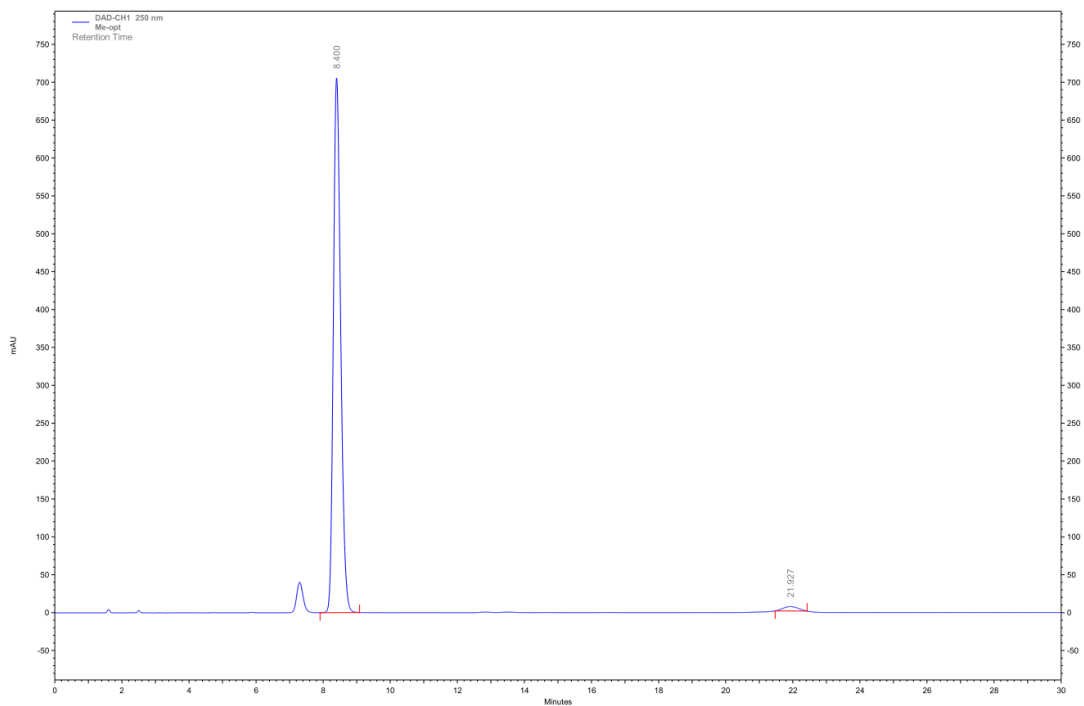

### DAD-CH1 250 nm Results

| Retention Time | Area     | Area % |
|----------------|----------|--------|
| 8.400          | 42690583 | 98.31  |
| 21.927         | 733616   | 1.69   |

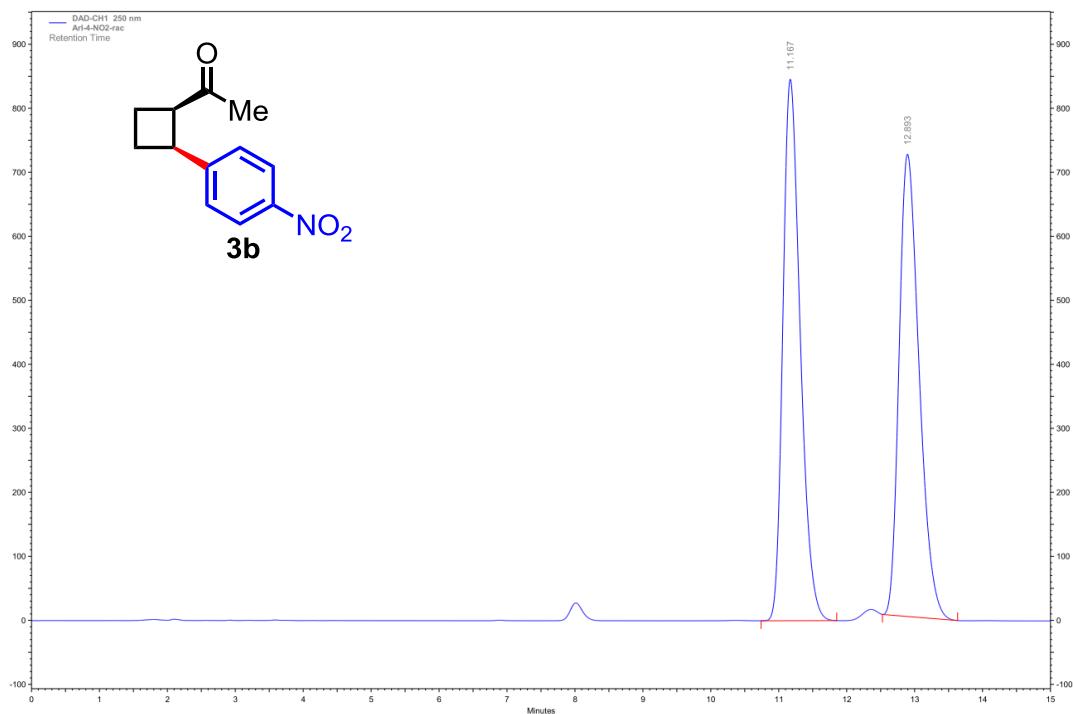

**DAD-CH1 250 nm Results**

| Retention Time | Area     | Area % |
|----------------|----------|--------|
| 11.167         | 59951146 | 50.29  |
| 12.893         | 59263659 | 49.71  |

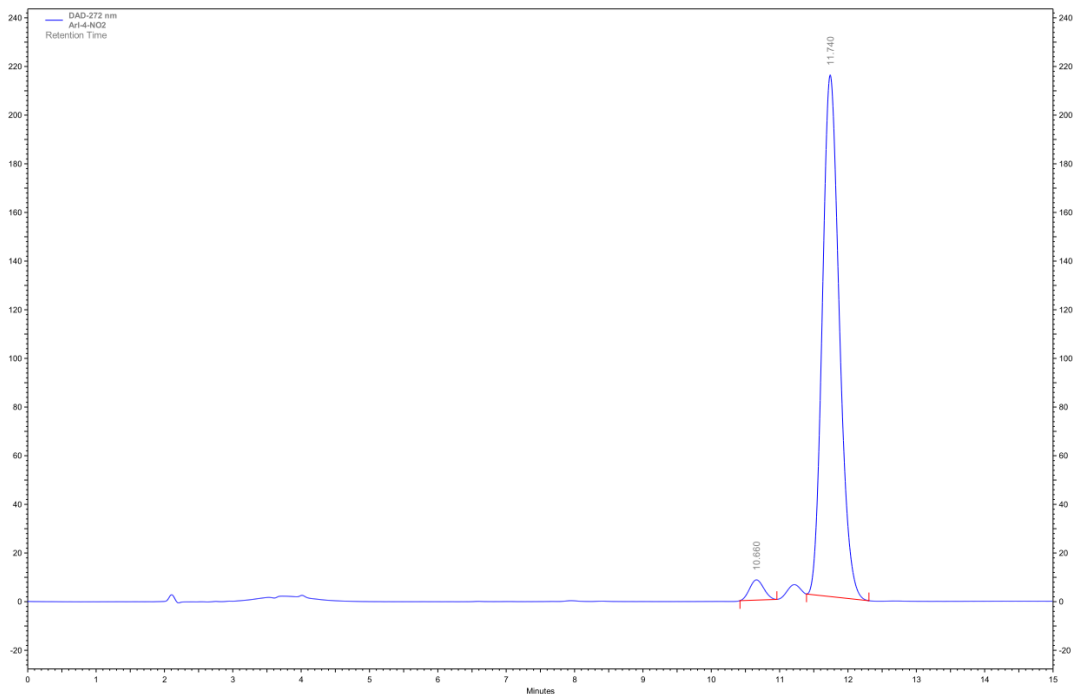

**DAD-CH1 250 nm Results**

| Retention Time | Area    | Area % |
|----------------|---------|--------|
| 10.660         | 256371  | 3.15   |
| 11.740         | 7884071 | 96.85  |

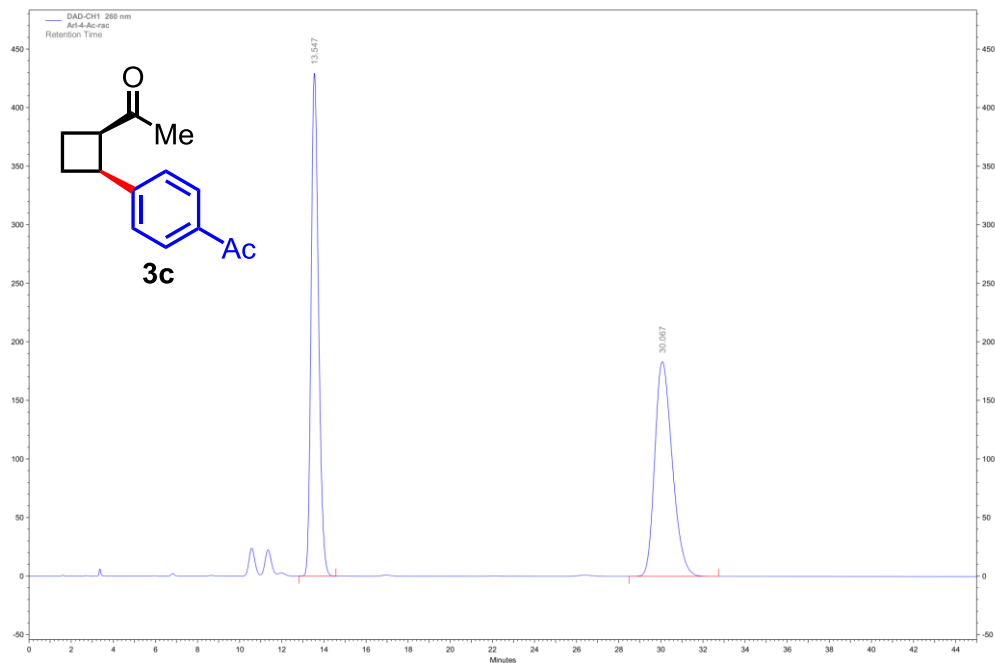

**DAD-CH1 260  
nm Results**

| Retention Time | Area     | Area % |
|----------------|----------|--------|
| 13.547         | 42257191 | 49.97  |
| 30.067         | 42313368 | 50.03  |

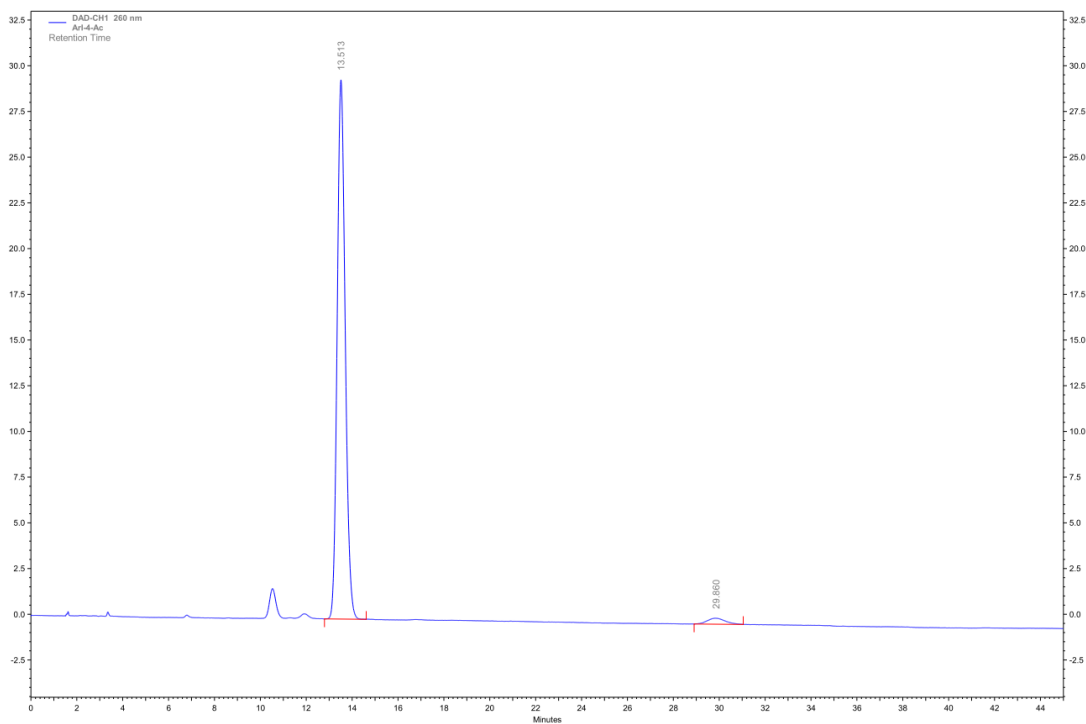

**DAD-CH1 260  
nm Results**

| Retention Time | Area    | Area % |
|----------------|---------|--------|
| 13.513         | 2869844 | 97.57  |
| 29.860         | 71579   | 2.43   |

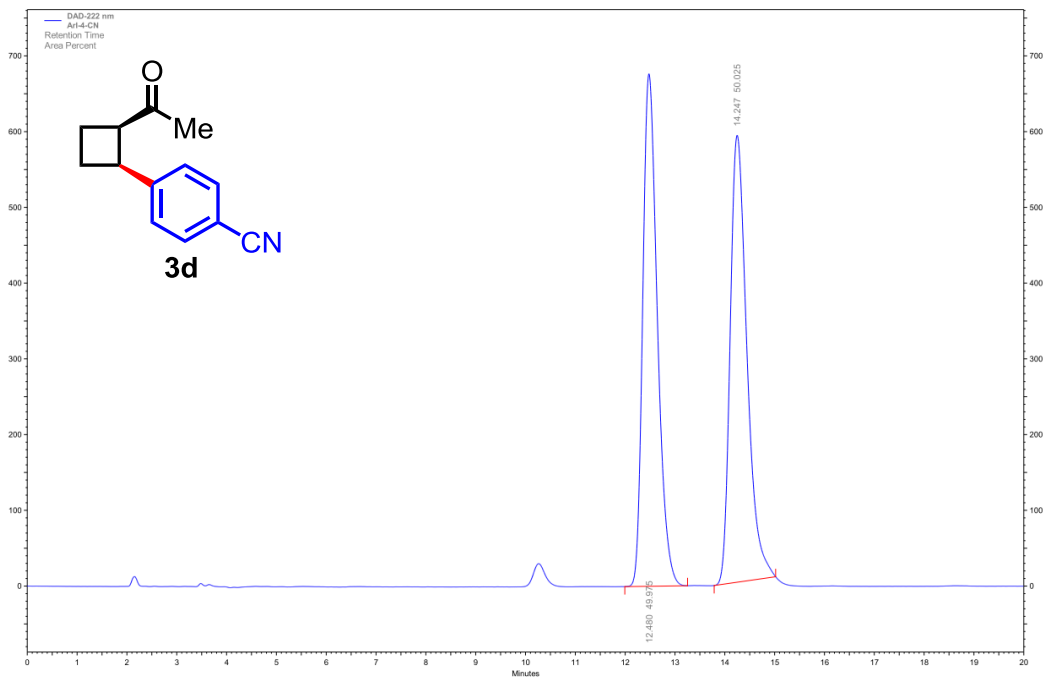

**DAD-CH1 250  
nm Results**

| Retention Time | Area     | Area % |
|----------------|----------|--------|
| 12.480         | 23932548 | 49.97  |
| 14.247         | 25407345 | 50.03  |

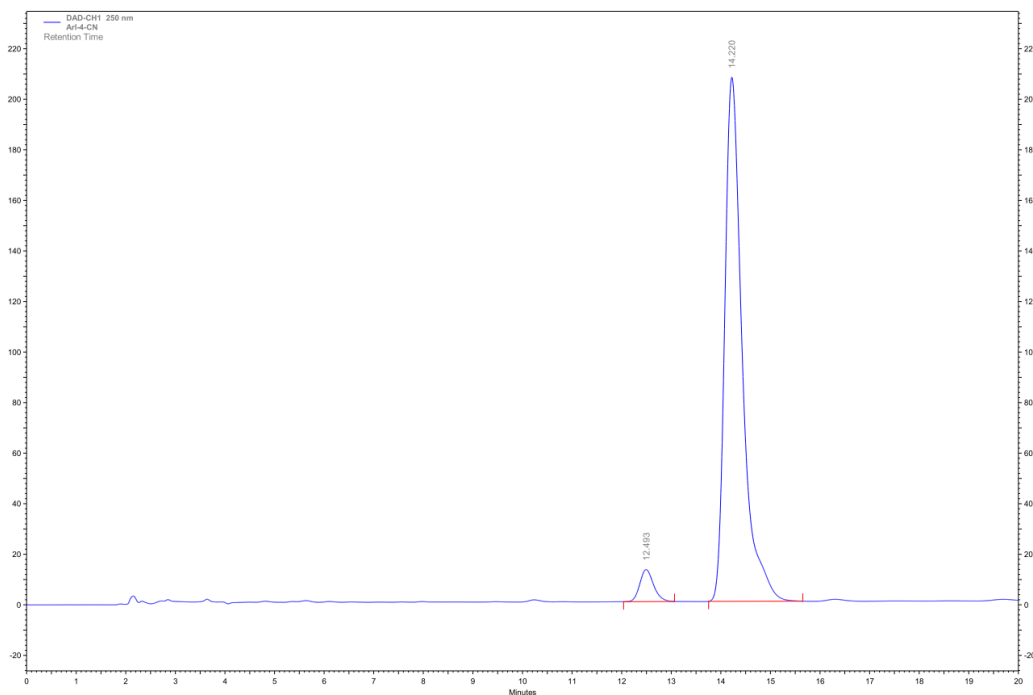

**DAD-CH1 250  
nm Results**

| Retention Time | Area     | Area % |
|----------------|----------|--------|
| 12.493         | 979580   | 4.61   |
| 14.220         | 20251991 | 95.39  |

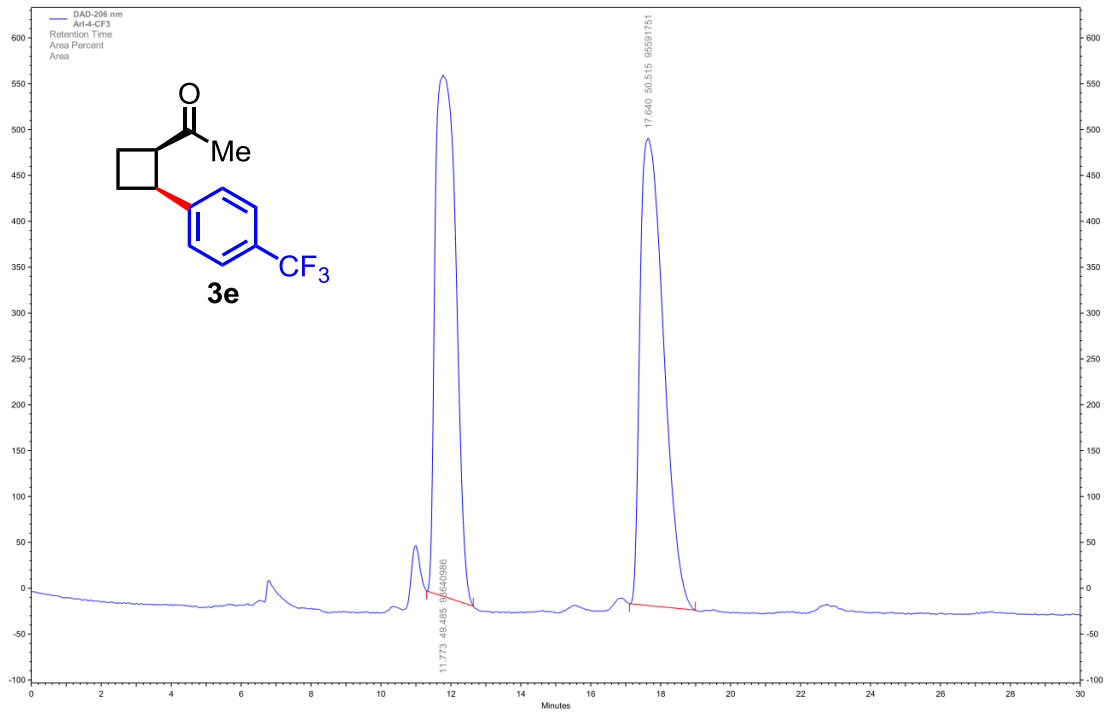

**DAD-CH1 206  
nm Results**

| Retention Time | Area     | Area % |
|----------------|----------|--------|
| 11.773         | 93640986 | 49.485 |
| 17.640         | 95591751 | 50.515 |

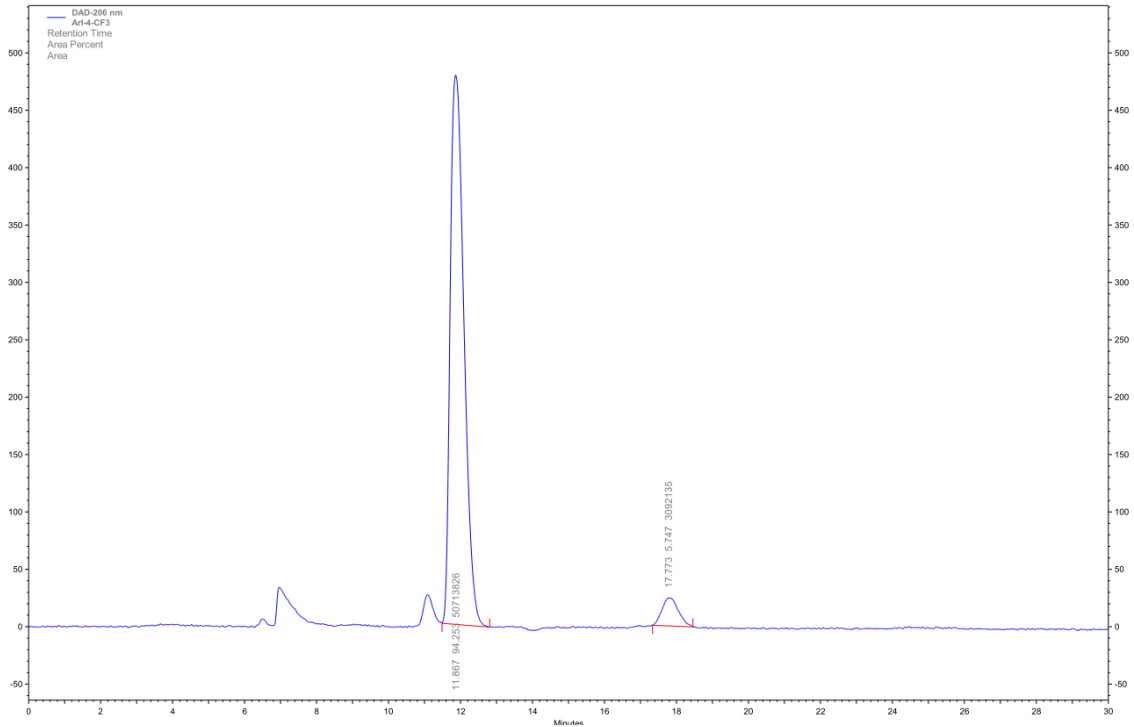

**DAD-CH1 206  
nm Results**

| Retention Time | Area     | Area % |
|----------------|----------|--------|
| 11.867         | 50713826 | 94.253 |
| 17.773         | 3092135  | 5.747  |

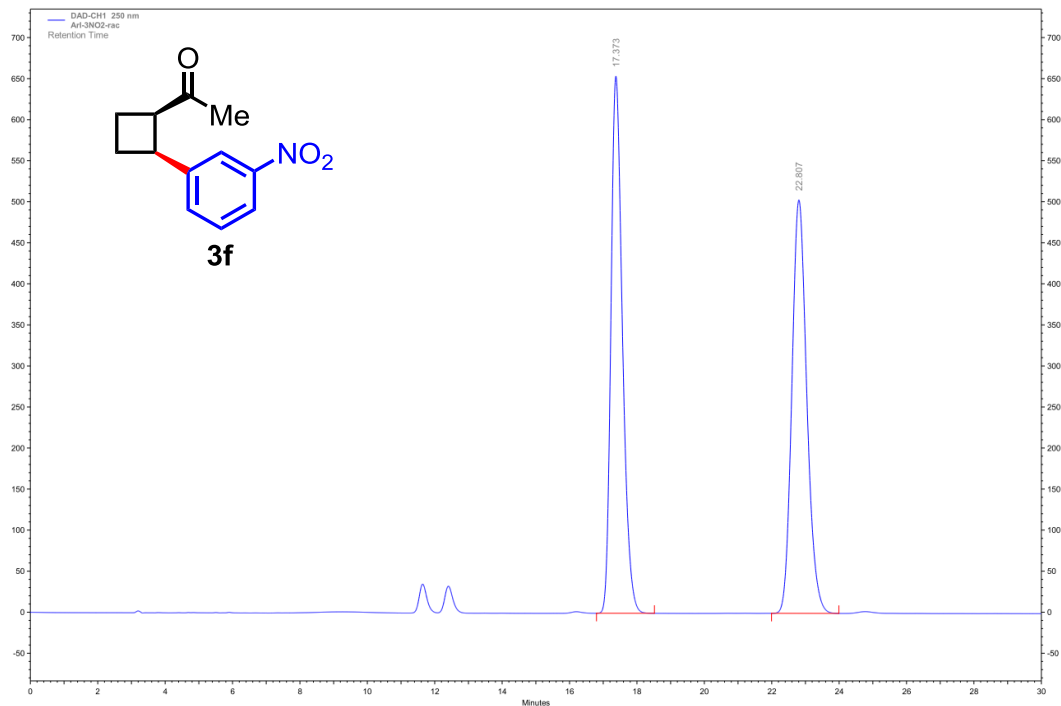

**DAD-CH1 250  
nm Results**

| Retention Time | Area     | Area % |
|----------------|----------|--------|
| 17.373         | 61998948 | 50.00  |
| 22.807         | 62002470 | 50.00  |

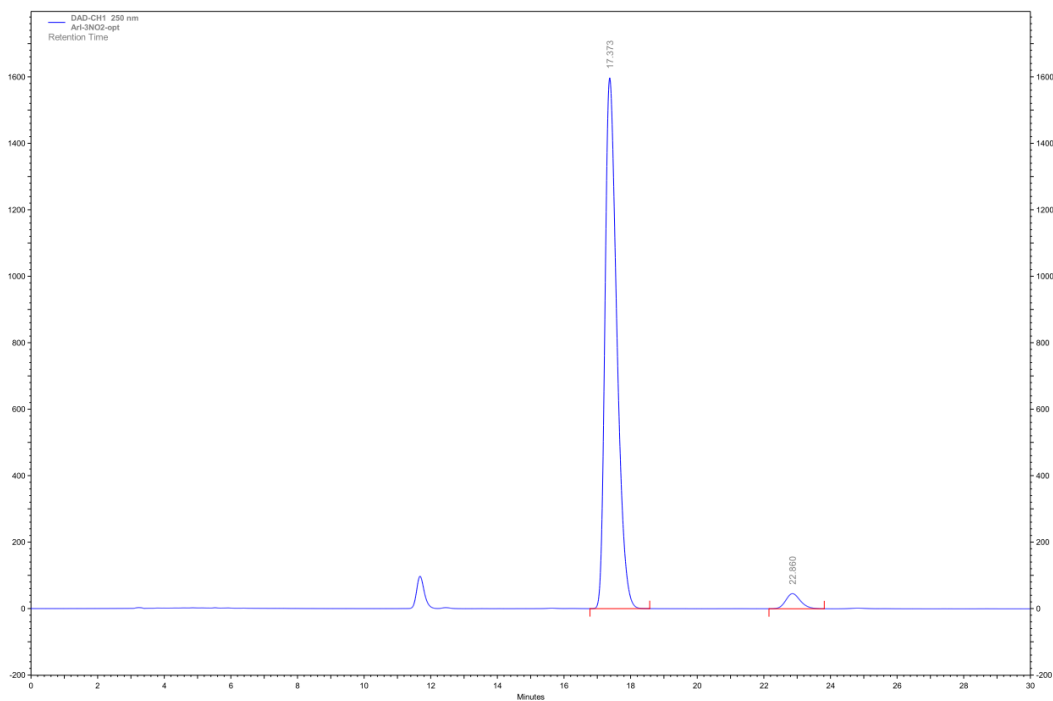

**DAD-CH1 250  
nm Results**

| Retention Time | Area      | Area % |
|----------------|-----------|--------|
| 17.373         | 157702621 | 96.58  |
| 22.860         | 5582082   | 3.42   |

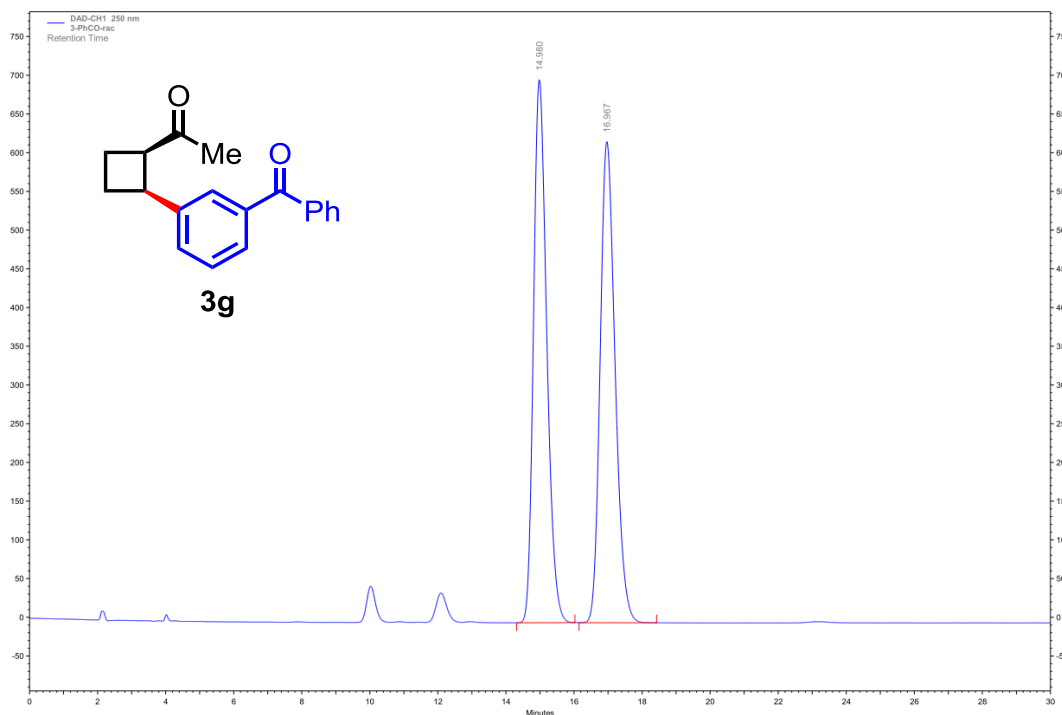

**DAD-CH1 250  
nm Results**

| Retention Time | Area     | Area % |
|----------------|----------|--------|
| 14.980         | 75679842 | 49.97  |
| 16.967         | 75783940 | 50.03  |

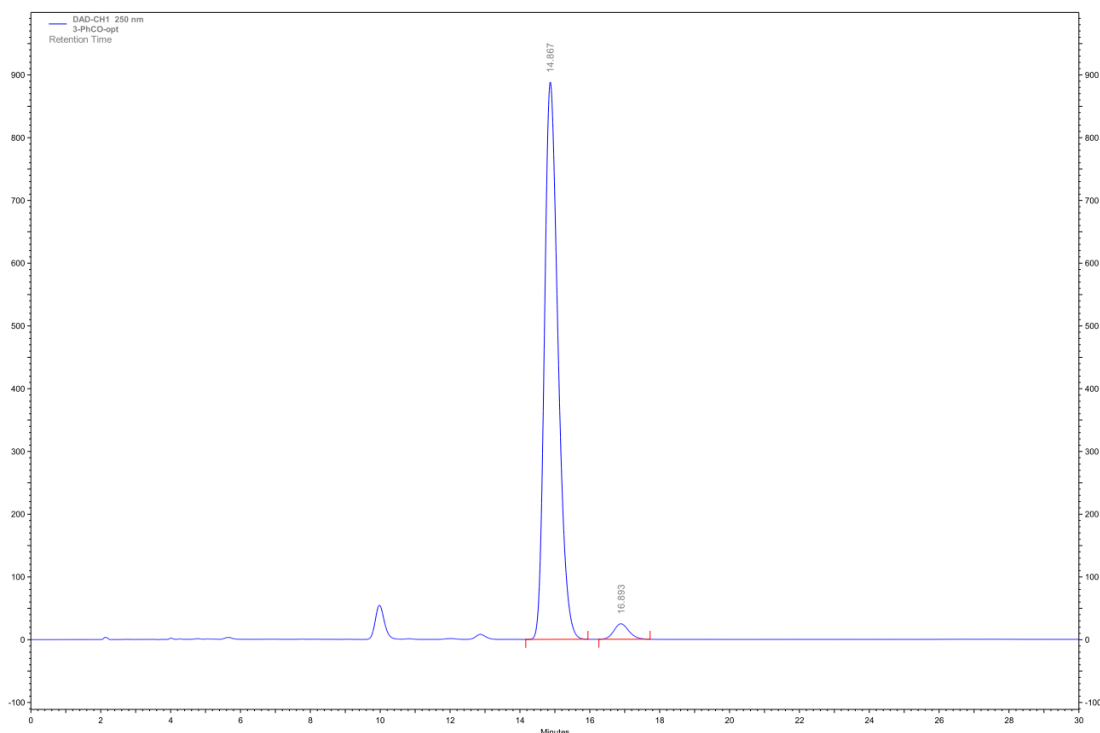

**DAD-CH1 250  
nm Results**

| Retention Time | Area     | Area % |
|----------------|----------|--------|
| 14.867         | 95884973 | 97.02  |
| 16.893         | 2942622  | 2.98   |

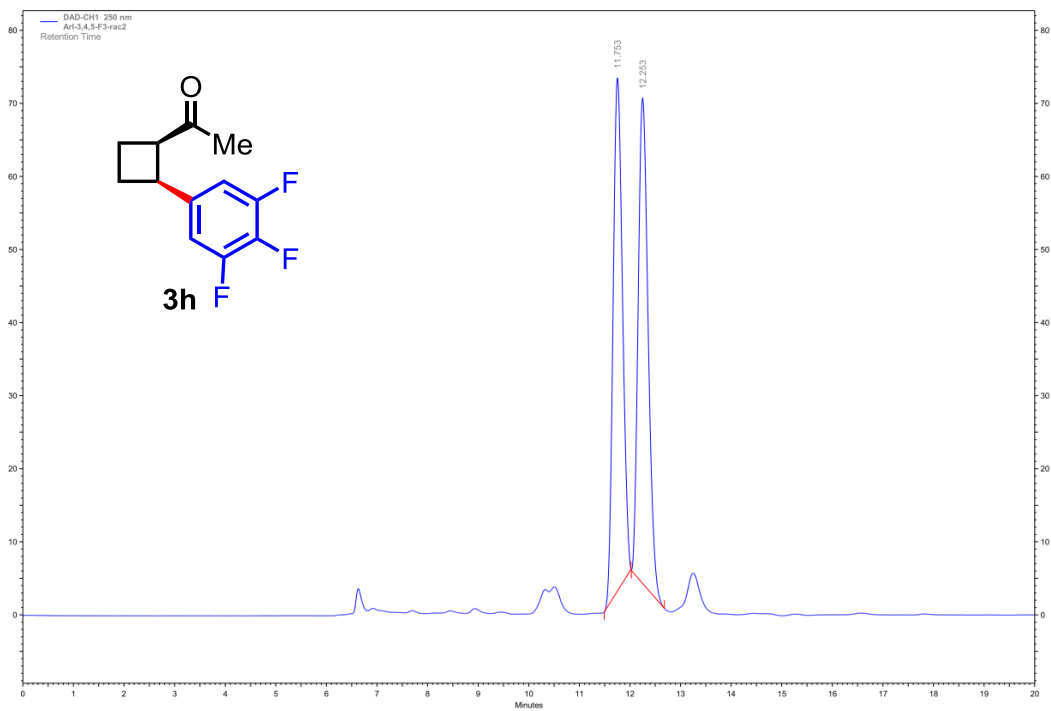

**DAD-CH1 250  
nm Results**

| Retention Time | Area    | Area % |
|----------------|---------|--------|
| 11.753         | 3620649 | 49.91  |
| 12.253         | 3633540 | 50.09  |

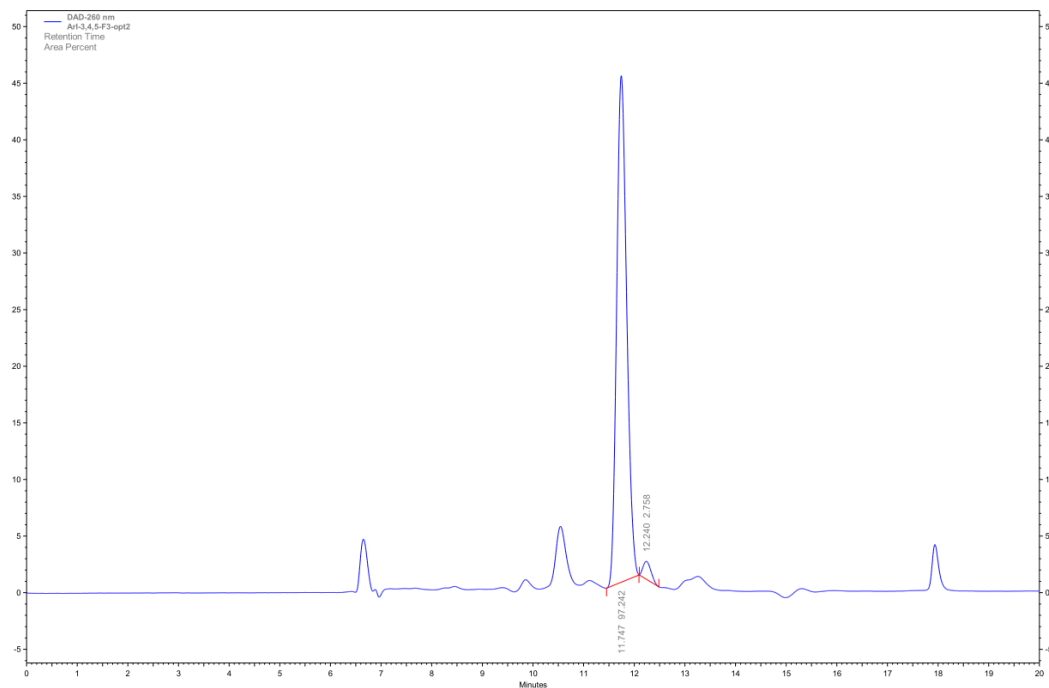

**DAD-CH1 250  
nm Results**

| Retention Time | Area    | Area % |
|----------------|---------|--------|
| 11.747         | 1904981 | 97.25  |
| 12.240         | 53841   | 2.75   |



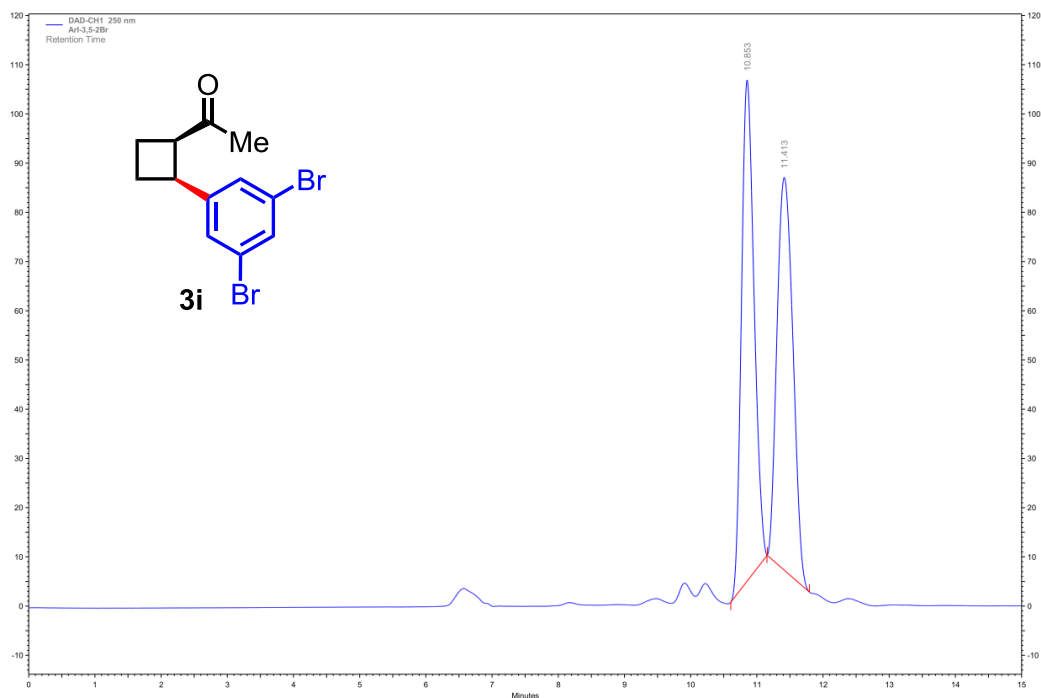

**DAD-CH1 250  
nm Results**

| Retention Time | Area    | Area % |
|----------------|---------|--------|
| 10.853         | 5399598 | 50.24  |
| 11.413         | 5348988 | 49.76  |

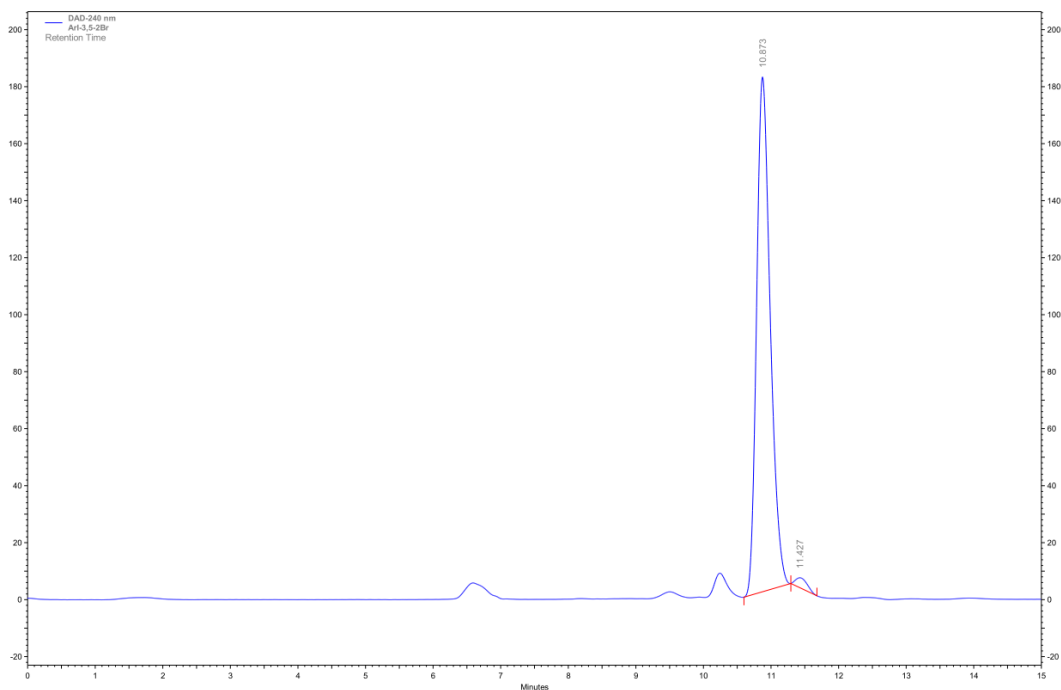

**DAD-CH1 250  
nm Results**

| Retention Time | Area    | Area % |
|----------------|---------|--------|
| 10.873         | 2149725 | 98.66  |
| 11.407         | 29260   | 1.34   |

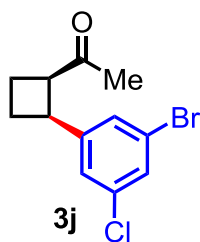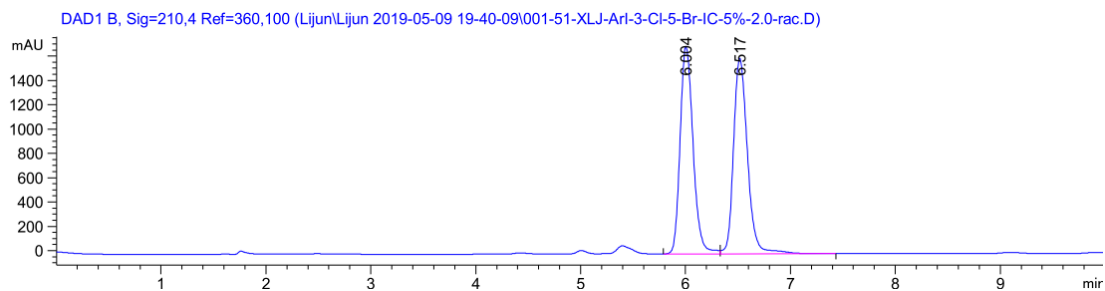

| Peak # | RetTime [min] | Type | Width [min] | Area [mAU*s] | Height [mAU] | Area %  |
|--------|---------------|------|-------------|--------------|--------------|---------|
| 1      | 6.004         | BV   | 0.1324      | 1.46543e4    | 1703.08911   | 49.6126 |
| 2      | 6.517         | VB   | 0.1440      | 1.48831e4    | 1608.19824   | 50.3874 |

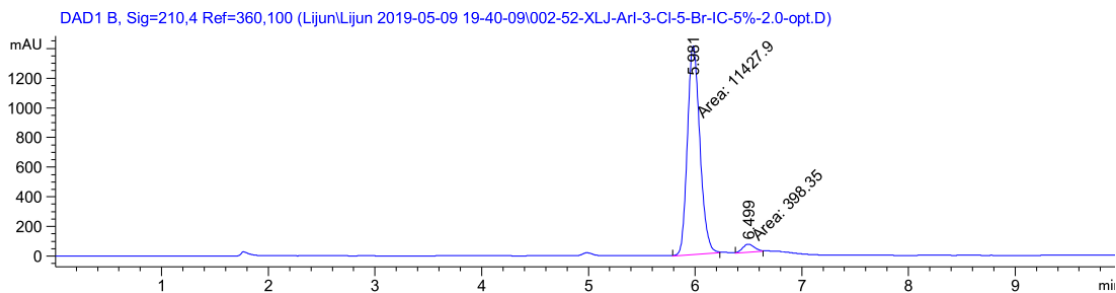

| Peak # | RetTime [min] | Type | Width [min] | Area [mAU*s] | Height [mAU] | Area %  |
|--------|---------------|------|-------------|--------------|--------------|---------|
| 1      | 5.981         | MM   | 0.1354      | 1.14279e4    | 1406.34131   | 96.6316 |
| 2      | 6.499         | MM   | 0.1244      | 398.35001    | 53.38059     | 3.3684  |

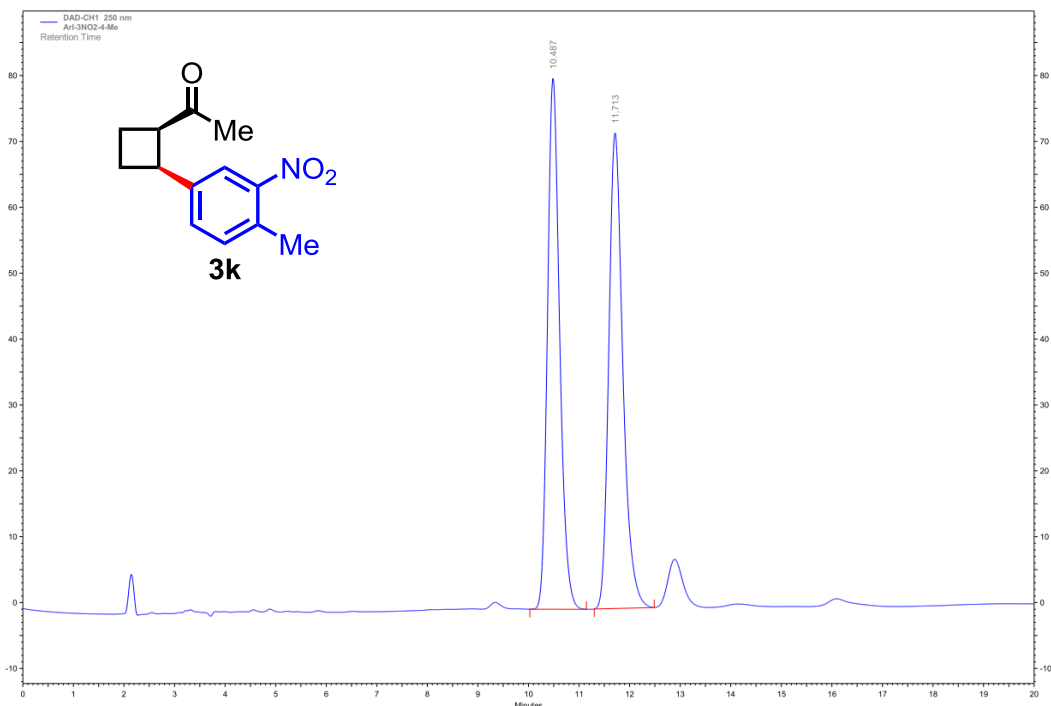

**DAD-CH1 250  
nm Results**

| Retention Time | Area    | Area % |
|----------------|---------|--------|
| 10.487         | 5376623 | 49.08  |
| 11.713         | 5578556 | 50.92  |

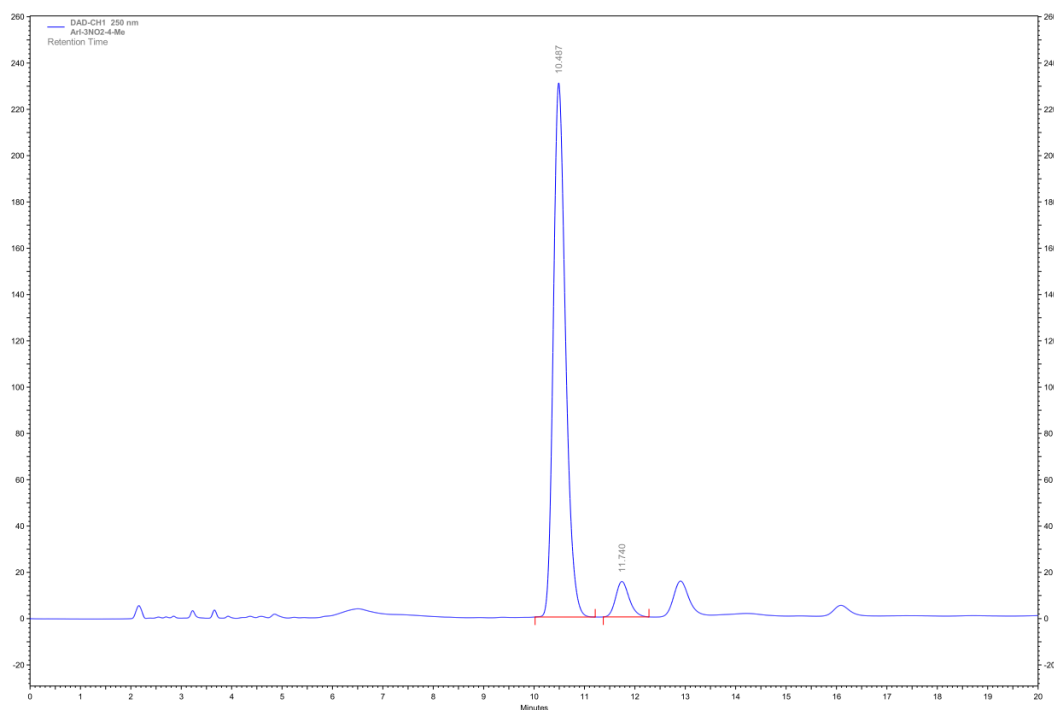

**DAD-CH1 250  
nm Results**

| Retention Time | Area     | Area % |
|----------------|----------|--------|
| 10.487         | 15558558 | 93.14  |
| 11.740         | 1145510  | 6.86   |



DAD1 B, Sig=210,4 Ref=360,100 (LijunLijun 2019-05-29 22-43-42\001-51-XLJ-Ari-2F-4Br-AS-0%-rac.D)

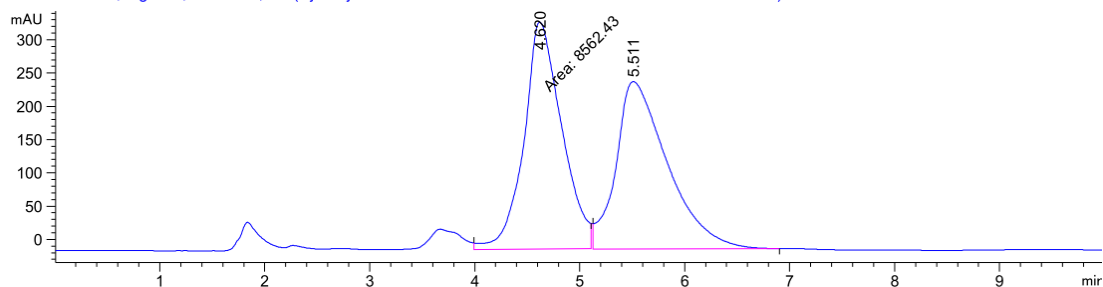

| Peak # | RetTime [min] | Type | Width [min] | Area [mAU*s] | Height [mAU] | Area %  |
|--------|---------------|------|-------------|--------------|--------------|---------|
| 1      | 4.620         | MM   | 0.4188      | 8562.43164   | 340.76370    | 49.8963 |
| 2      | 5.511         | VB   | 0.5001      | 8598.02441   | 251.95415    | 50.1037 |

DAD1 B, Sig=210,4 Ref=360,100 (LijunLijun 2019-05-29 22-43-42\002-52-XLJ-Ari-2F-4Br-AS-0%-opt.D)

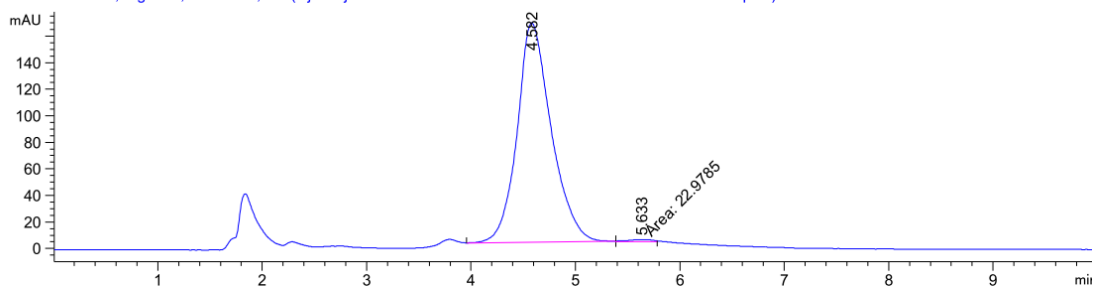

| Peak # | RetTime [min] | Type | Width [min] | Area [mAU*s] | Height [mAU] | Area %  |
|--------|---------------|------|-------------|--------------|--------------|---------|
| 1      | 4.582         | BB   | 0.3341      | 3737.61841   | 165.11324    | 99.3890 |
| 2      | 5.633         | MM   | 0.2765      | 22.97846     | 1.38517      | 0.6110  |

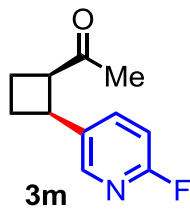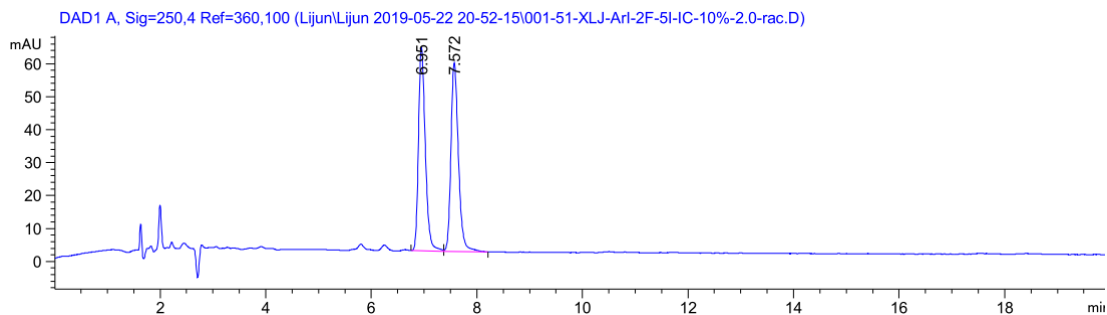

| Peak # | RetTime [min] | Type | Width [min] | Area [mAU*s] | Height [mAU] | Area %  |
|--------|---------------|------|-------------|--------------|--------------|---------|
| 1      | 6.951         | BV   | 0.1369      | 555.70782    | 61.81274     | 49.6309 |
| 2      | 7.572         | VB   | 0.1509      | 563.97229    | 57.28272     | 50.3691 |

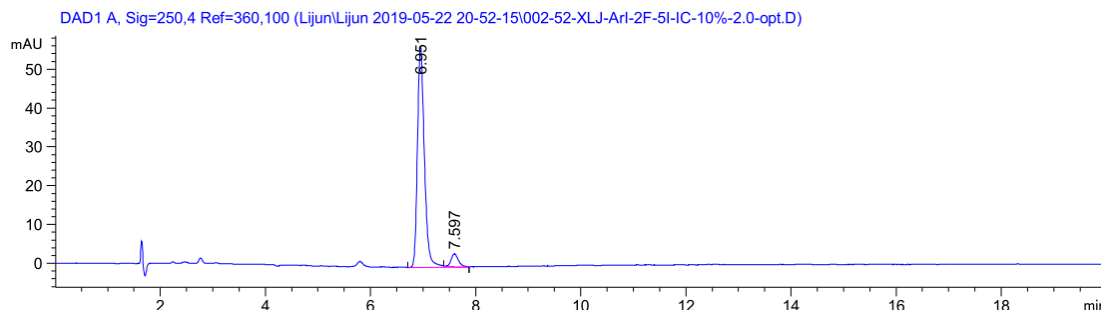

| Peak # | RetTime [min] | Type | Width [min] | Area [mAU*s] | Height [mAU] | Area %  |
|--------|---------------|------|-------------|--------------|--------------|---------|
| 1      | 6.951         | BV R | 0.1387      | 519.40497    | 56.81502     | 94.1818 |
| 2      | 7.597         | VB E | 0.1449      | 32.08715     | 3.37446      | 5.8182  |

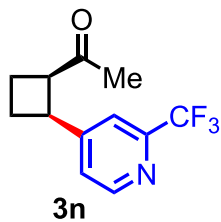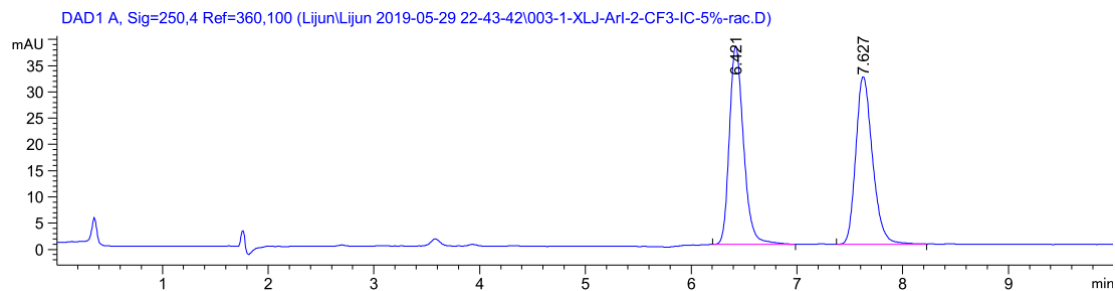

| Peak # | RetTime [min] | Type | Width [min] | Area [mAU*s] | Height [mAU] | Area %  |
|--------|---------------|------|-------------|--------------|--------------|---------|
| 1      | 6.421         | BB   | 0.1425      | 351.27402    | 37.78881     | 50.0834 |
| 2      | 7.627         | BB   | 0.1699      | 350.10461    | 31.94782     | 49.9166 |

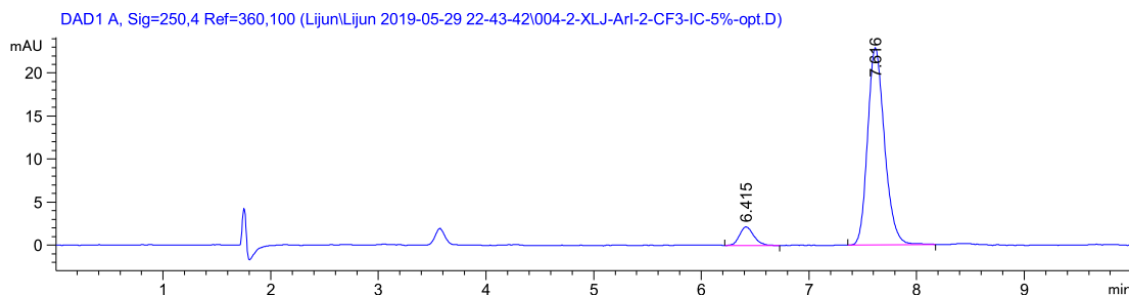

| Peak # | RetTime [min] | Type | Width [min] | Area [mAU*s] | Height [mAU] | Area %  |
|--------|---------------|------|-------------|--------------|--------------|---------|
| 1      | 6.415         | BB   | 0.1434      | 20.24956     | 2.15862      | 7.4900  |
| 2      | 7.616         | BB   | 0.1693      | 250.10361    | 22.91296     | 92.5100 |

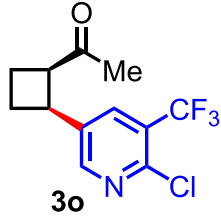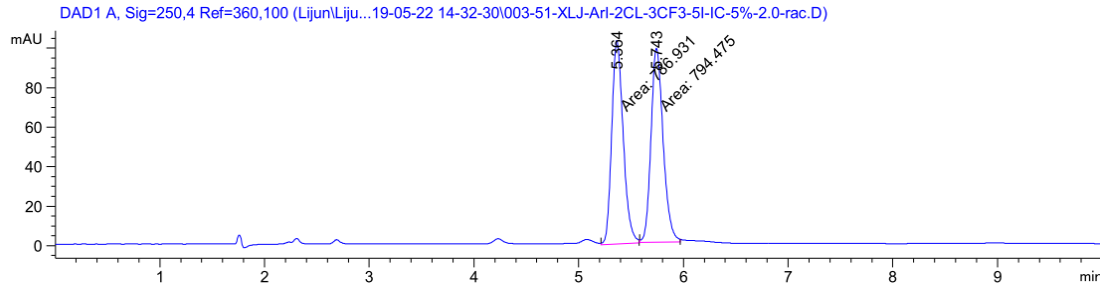

| Peak # | RetTime [min] | Type | Width [min] | Area [mAU*s] | Height [mAU] | Area %  |
|--------|---------------|------|-------------|--------------|--------------|---------|
| 1      | 5.364         | MM   | 0.1271      | 786.93103    | 103.21477    | 49.7615 |
| 2      | 5.743         | MM   | 0.1347      | 794.47510    | 98.31642     | 50.2385 |

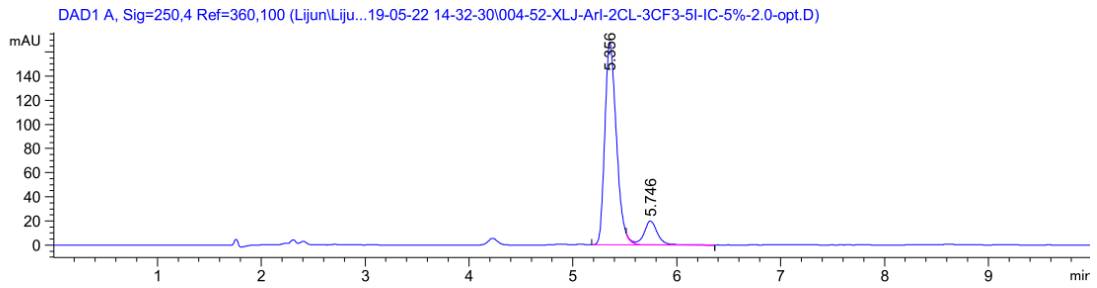

| Peak # | RetTime [min] | Type | Width [min] | Area [mAU*s] | Height [mAU] | Area %  |
|--------|---------------|------|-------------|--------------|--------------|---------|
| 1      | 5.356         | BV R | 0.1188      | 1305.69495   | 167.75298    | 87.9672 |
| 2      | 5.746         | VB E | 0.1354      | 178.60246    | 19.77604     | 12.0328 |

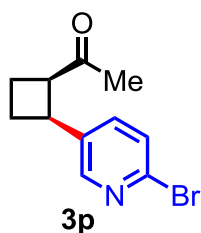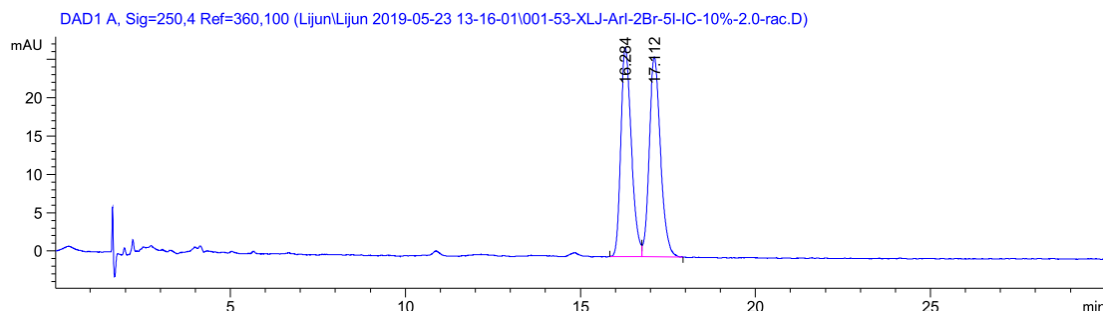

| Peak # | RetTime [min] | Type | Width [min] | Area [mAU*s] | Height [mAU] | Area %  |
|--------|---------------|------|-------------|--------------|--------------|---------|
| 1      | 16.284        | BV   | 0.3228      | 571.06885    | 27.21883     | 49.5780 |
| 2      | 17.112        | VB   | 0.3420      | 580.79102    | 26.06443     | 50.4220 |

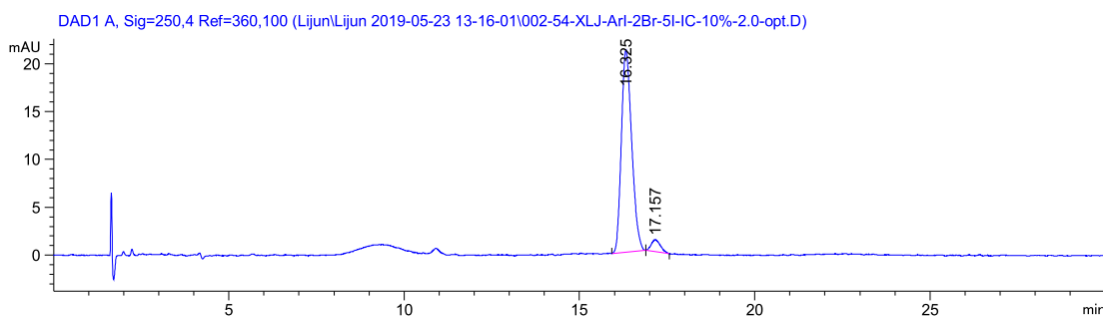

| Peak # | RetTime [min] | Type | Width [min] | Area [mAU*s] | Height [mAU] | Area %  |
|--------|---------------|------|-------------|--------------|--------------|---------|
| 1      | 16.325        | BB   | 0.3152      | 433.45526    | 21.13733     | 95.0080 |
| 2      | 17.157        | BB   | 0.2307      | 22.77508     | 1.26098      | 4.9920  |



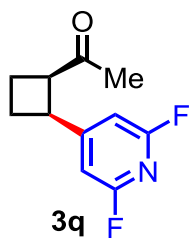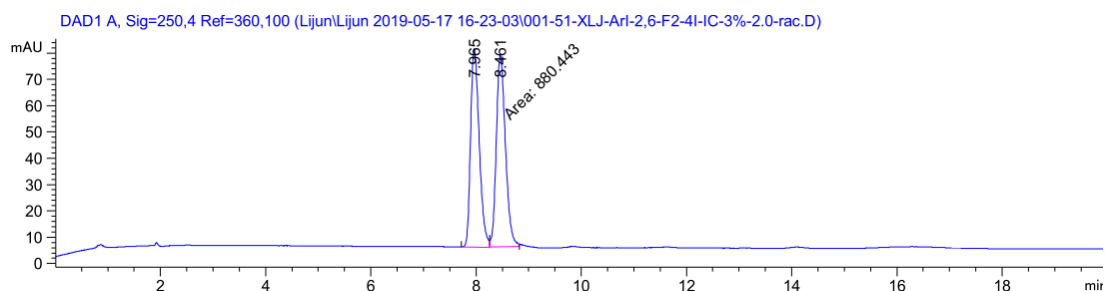

| Peak # | RetTime [min] | Type | Width [min] | Area [mAU*s] | Height [mAU] | Area %  |
|--------|---------------|------|-------------|--------------|--------------|---------|
| 1      | 7.965         | BV   | 0.1767      | 856.81567    | 75.34479     | 49.3200 |
| 2      | 8.461         | MM   | 0.2017      | 880.44281    | 72.76616     | 50.6800 |

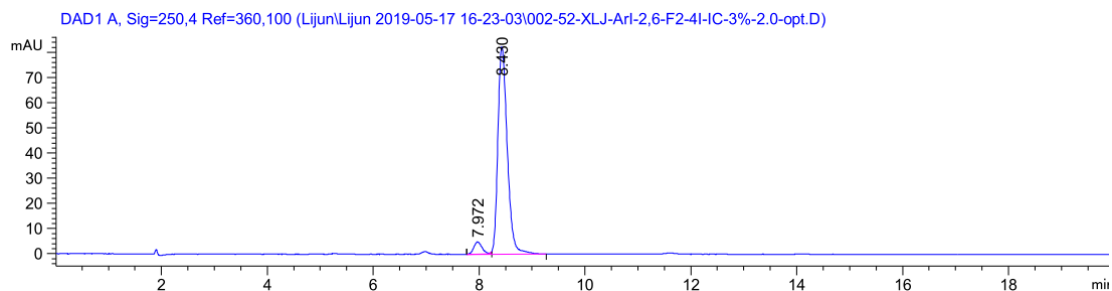

| Peak # | RetTime [min] | Type | Width [min] | Area [mAU*s] | Height [mAU] | Area %  |
|--------|---------------|------|-------------|--------------|--------------|---------|
| 1      | 7.972         | BV E | 0.1614      | 53.46638     | 4.89643      | 4.9942  |
| 2      | 8.430         | VB R | 0.1900      | 1017.10260   | 82.40462     | 95.0058 |

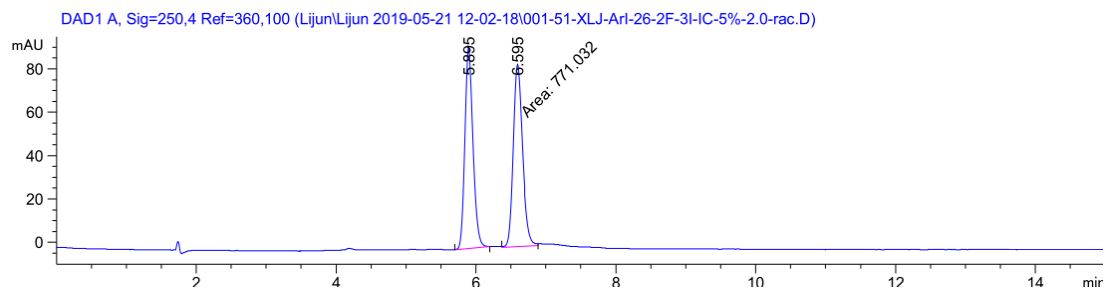

| Peak # | RetTime [min] | Type | Width [min] | Area [mAU*s] | Height [mAU] | Area %  |
|--------|---------------|------|-------------|--------------|--------------|---------|
| 1      | 5.895         | BB   | 0.1255      | 761.34131    | 93.00169     | 49.6838 |
| 2      | 6.595         | MM   | 0.1530      | 771.03217    | 83.96684     | 50.3162 |

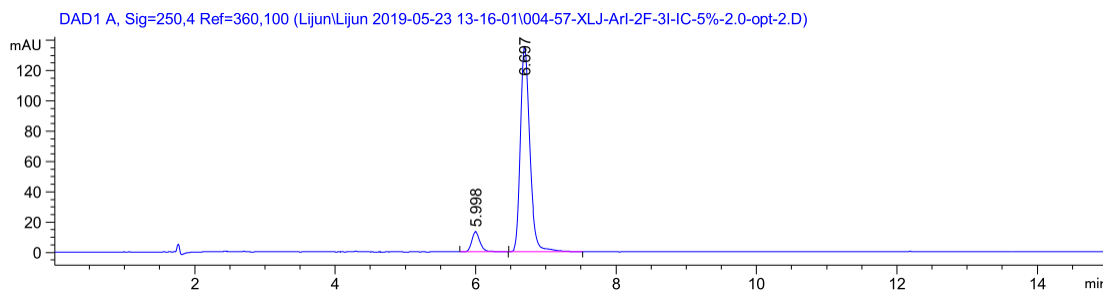

| Peak # | RetTime [min] | Type | Width [min] | Area [mAU*s] | Height [mAU] | Area %  |
|--------|---------------|------|-------------|--------------|--------------|---------|
| 1      | 5.998         | BB   | 0.1259      | 110.21342    | 13.40715     | 8.1106  |
| 2      | 6.697         | BB   | 0.1418      | 1248.66992   | 135.10104    | 91.8894 |

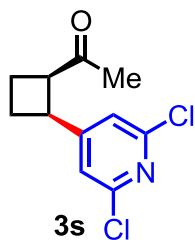

DAD1 B, Sig=210,4 Ref=360,100 (LijunLijun 2019-05-22 20-52-15\008-56-XLJ-Arl-26-2Cl-4I-IC-5%-2.0-opt.D)

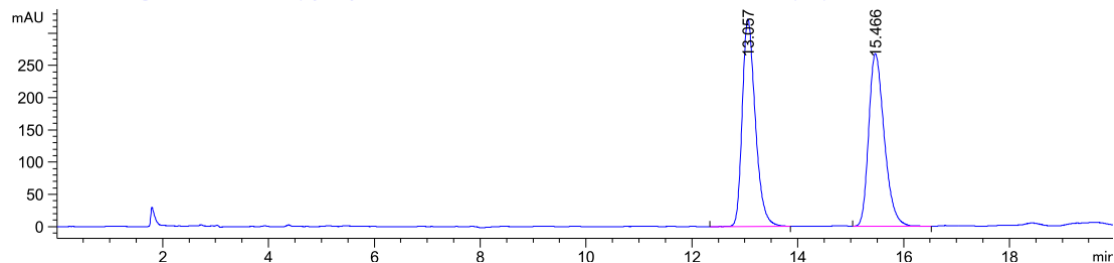

| Peak # | RetTime [min] | Type | Width [min] | Area [mAU*s] | Height [mAU] | Area %  |
|--------|---------------|------|-------------|--------------|--------------|---------|
| 1      | 13.057        | BB   | 0.2643      | 5522.30176   | 321.66049    | 50.2500 |
| 2      | 15.466        | BB   | 0.3140      | 5467.35254   | 268.04251    | 49.7500 |

DAD1 B, Sig=210,4 Ref=360,100 (LijunLijun 2019-05-22 20-52-15\007-55-XLJ-Arl-26-2Cl-4I-IC-5%-2.0-rac.D)

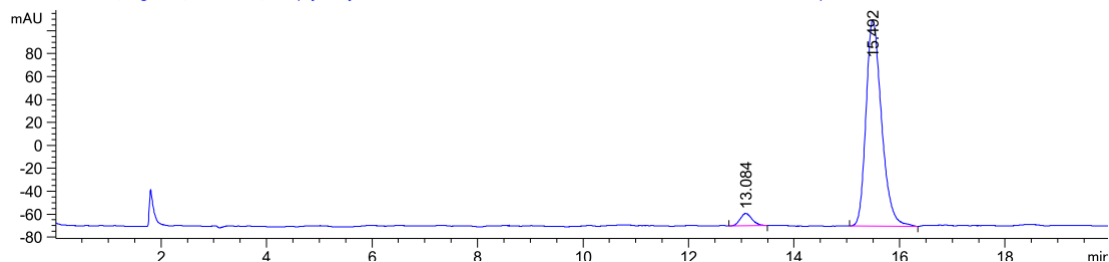

| Peak # | RetTime [min] | Type | Width [min] | Area [mAU*s] | Height [mAU] | Area %  |
|--------|---------------|------|-------------|--------------|--------------|---------|
| 1      | 13.084        | BB   | 0.2406      | 168.77231    | 10.78534     | 4.3950  |
| 2      | 15.492        | BB   | 0.3124      | 3671.28857   | 179.63487    | 95.6050 |

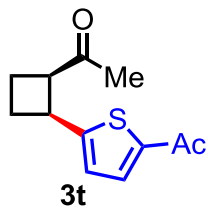

DAD1 A, Sig=250,4 Ref=360,100 (LijunLijun 2019-05-29 22-43-42\005-3-XLJ-Arl-2-Ac-Thi-IC-20%-rac.D)

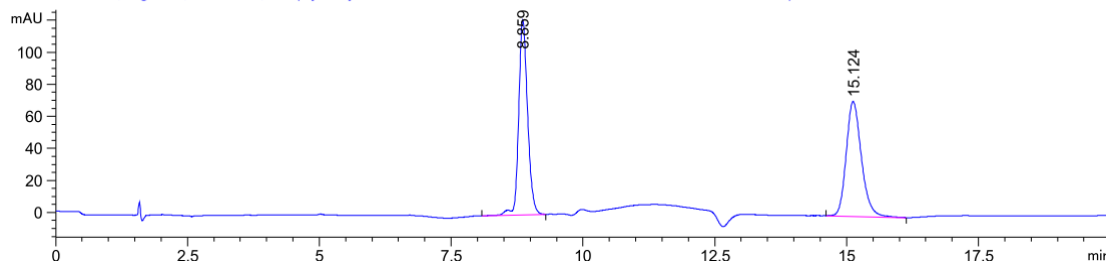

| Peak # | RetTime [min] | Type | Width [min] | Area [mAU*s] | Height [mAU] | Area %  |
|--------|---------------|------|-------------|--------------|--------------|---------|
| 1      | 8.859         | VB R | 0.1762      | 1430.59680   | 121.73954    | 49.9282 |
| 2      | 15.124        | BB   | 0.3074      | 1434.70874   | 71.71735     | 50.0718 |

DAD1 A, Sig=250,4 Ref=360,100 (LijunLijun 2019-05-29 22-43-42\006-4-XLJ-Arl-2-Ac-Thi-IC-20%-opt.D)

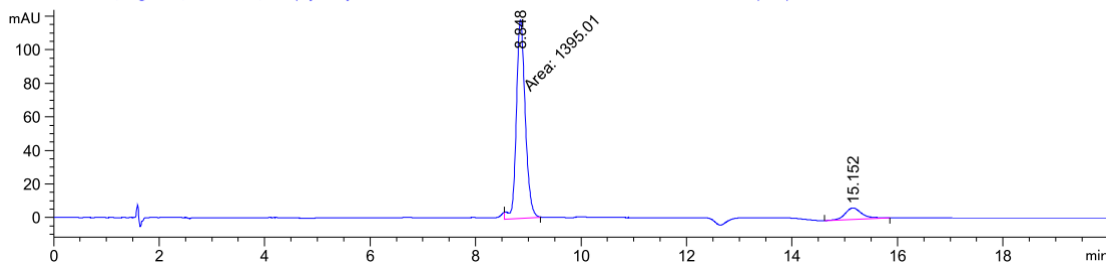

| Peak # | RetTime [min] | Type | Width [min] | Area [mAU*s] | Height [mAU] | Area %  |
|--------|---------------|------|-------------|--------------|--------------|---------|
| 1      | 8.848         | MM   | 0.1961      | 1395.00525   | 118.57172    | 90.3133 |
| 2      | 15.152        | BB   | 0.3316      | 149.62393    | 6.83013      | 9.6867  |

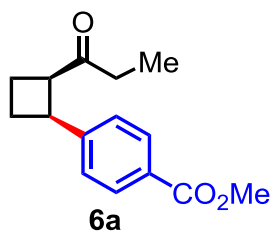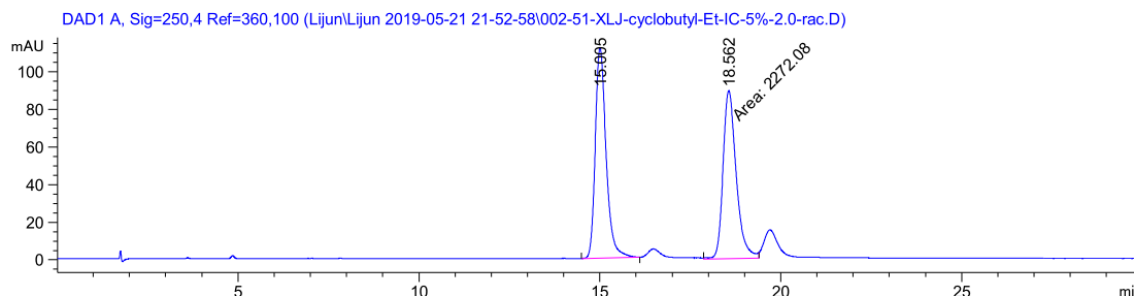

| Peak # | RetTime [min] | Type | Width [min] | Area [mAU*s] | Height [mAU] | Area %  |
|--------|---------------|------|-------------|--------------|--------------|---------|
| 1      | 15.005        | BB   | 0.3163      | 2320.00513   | 111.69574    | 50.5218 |
| 2      | 18.562        | MM   | 0.4238      | 2272.08032   | 89.34408     | 49.4782 |

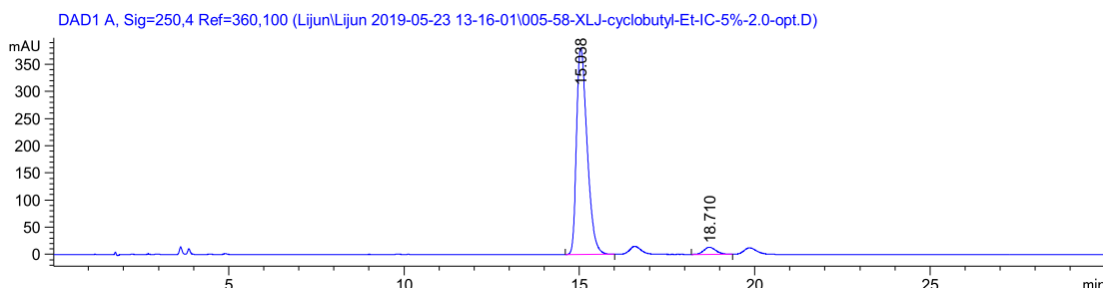

| Peak # | RetTime [min] | Type | Width [min] | Area [mAU*s] | Height [mAU] | Area %  |
|--------|---------------|------|-------------|--------------|--------------|---------|
| 1      | 15.038        | BB   | 0.3276      | 8004.55029   | 380.26929    | 96.2042 |
| 2      | 18.710        | BB   | 0.3647      | 315.82397    | 13.12700     | 3.7958  |

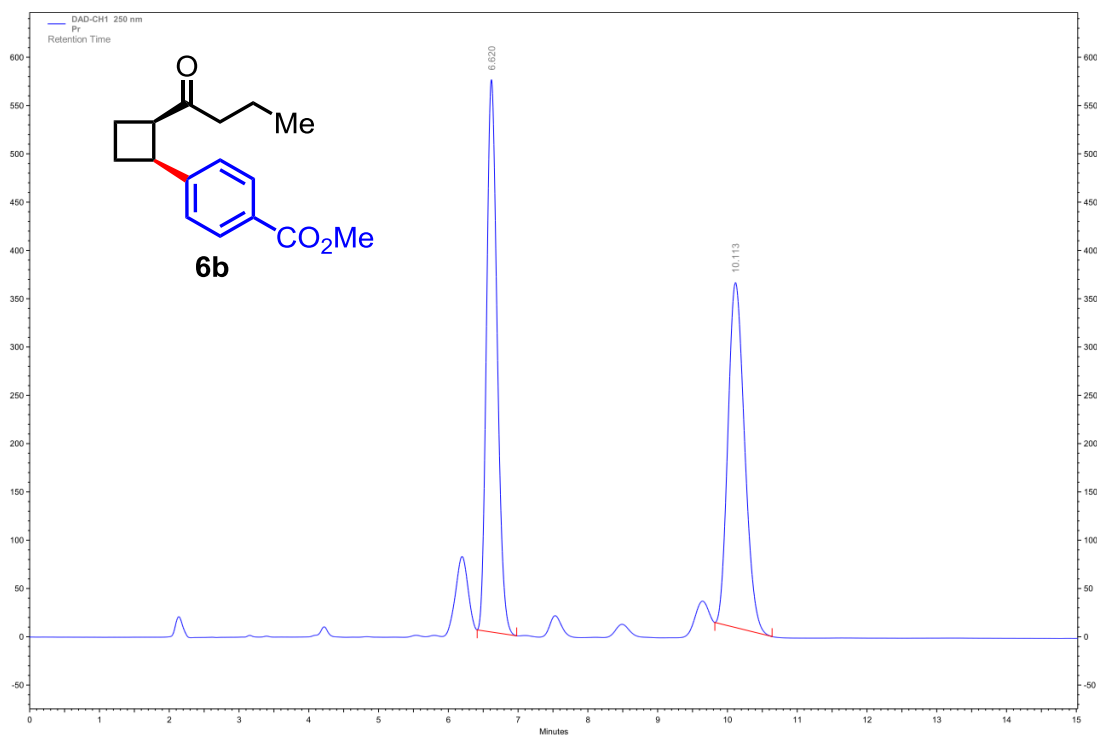

**DAD-CH1 250  
nm Results**

| Retention Time | Area     | Area % |
|----------------|----------|--------|
| 6.620          | 24299965 | 50.65  |
| 10.113         | 23675748 | 49.35  |

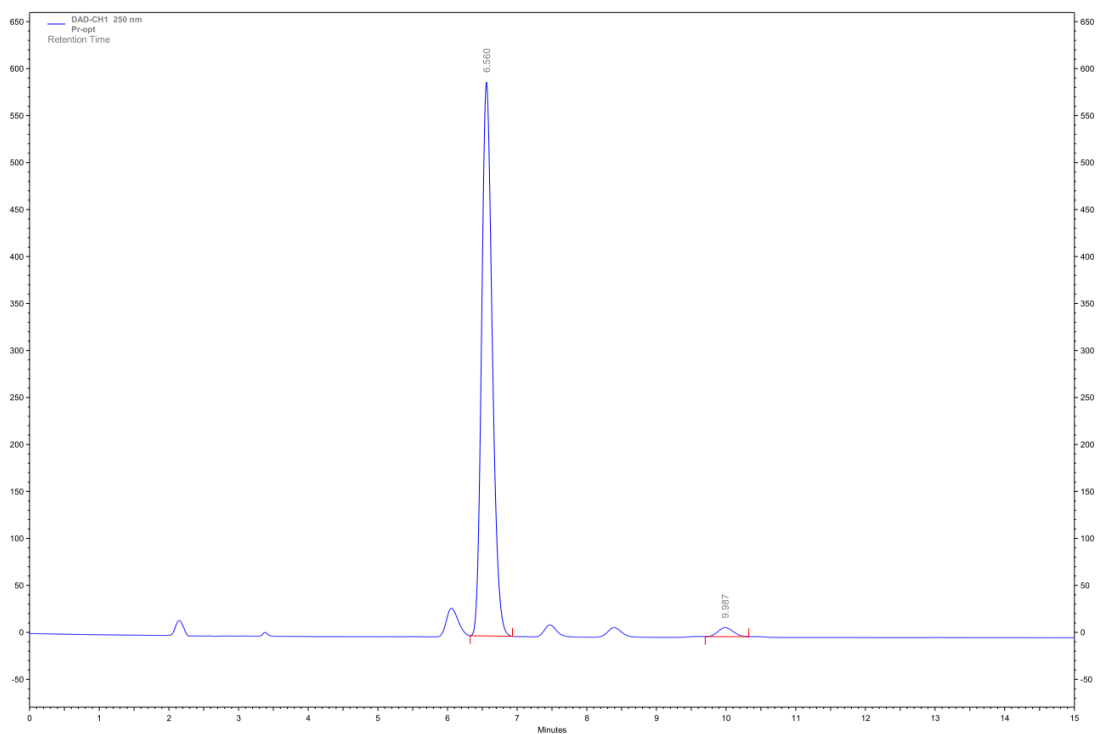

**DAD-CH1 250  
nm Results**

| Retention Time | Area     | Area % |
|----------------|----------|--------|
| 6.560          | 25009717 | 97.75  |
| 9.987          | 574833   | 2.25   |

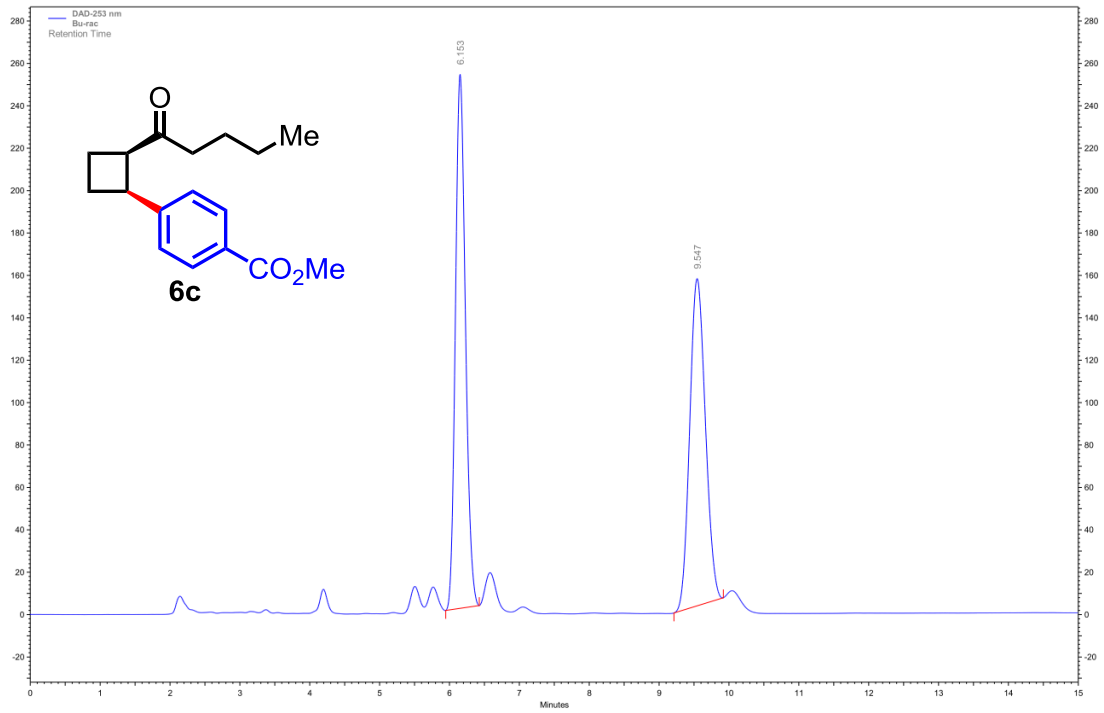

**DAD-CH1 250  
nm Results**

| Retention Time | Area     | Area % |
|----------------|----------|--------|
| 6.153          | 14130801 | 51.24  |
| 9.547          | 13449332 | 48.76  |

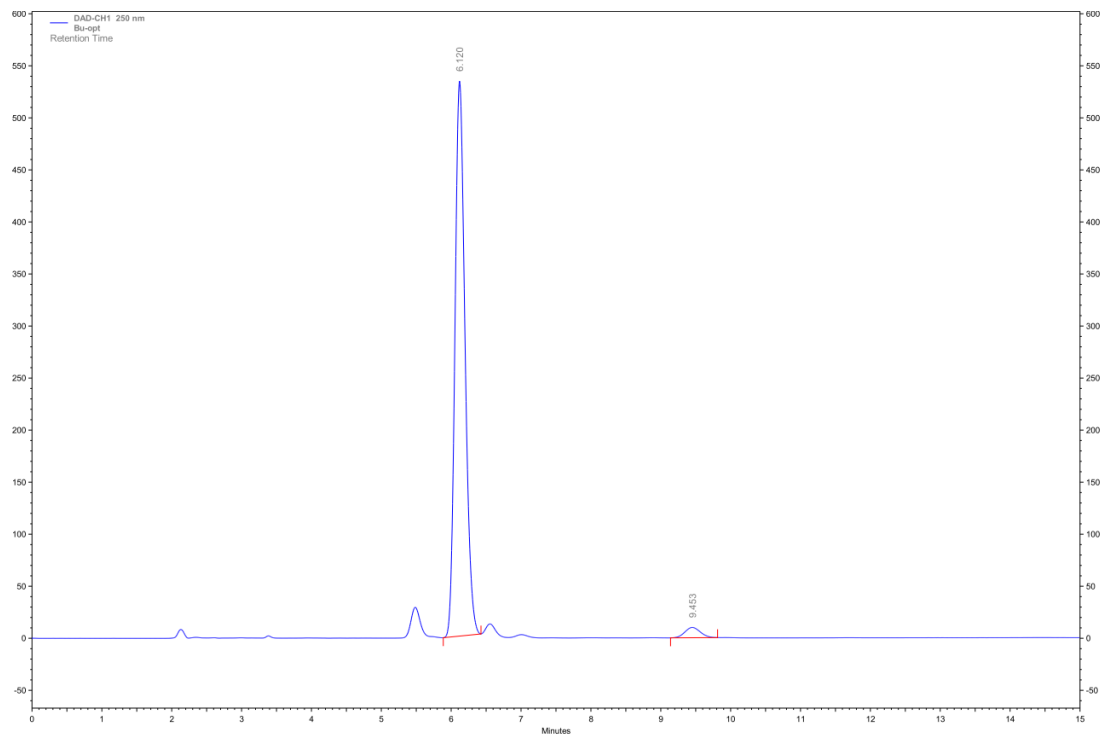

**DAD-CH1 250  
nm Results**

| Retention Time | Area     | Area % |
|----------------|----------|--------|
| 6.120          | 21319786 | 97.22  |
| 9.453          | 608622   | 2.78   |

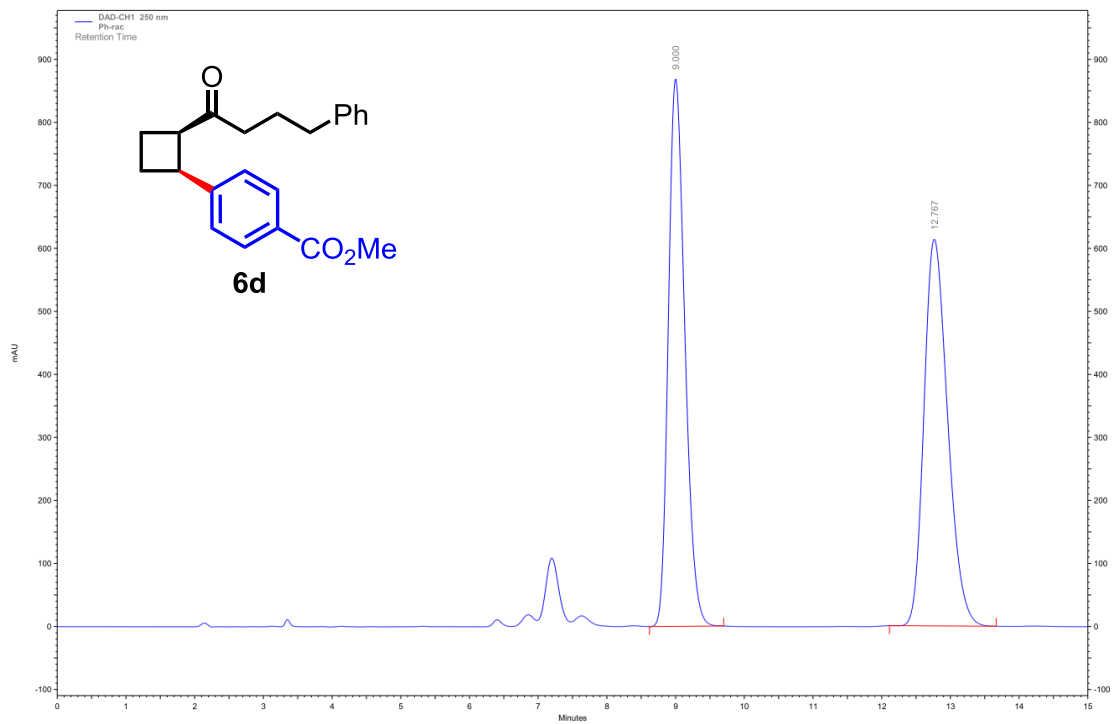

**DAD-CH1 250  
nm Results**

| Retention Time | Area     | Area % |
|----------------|----------|--------|
| 9.000          | 57906573 | 49.64  |
| 12.767         | 58756878 | 50.36  |

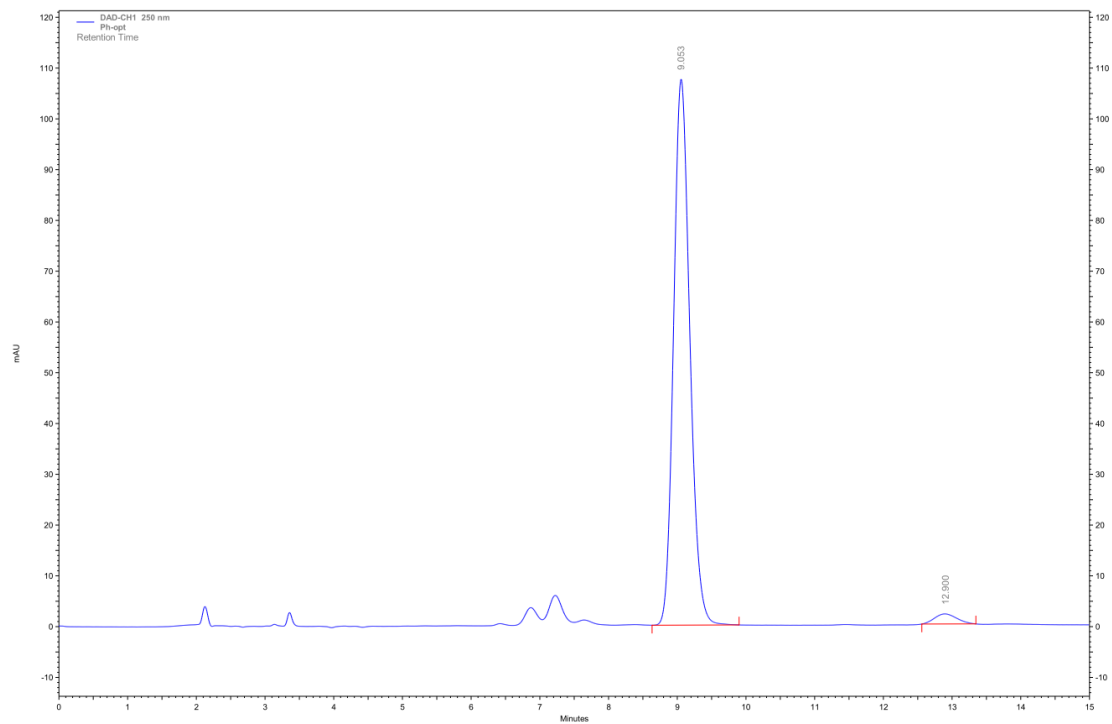

**DAD-CH1 250  
nm Results**

| Retention Time | Area    | Area % |
|----------------|---------|--------|
| 9.053          | 7057445 | 97.54  |
| 12.900         | 177754  | 2.46   |



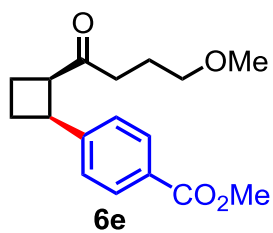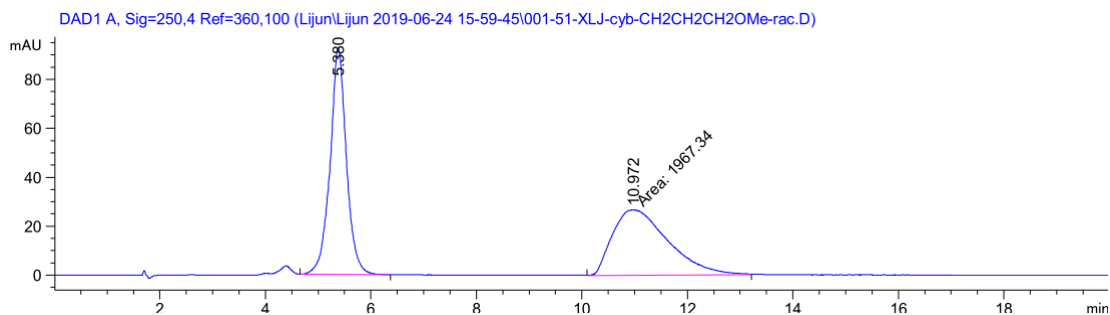

| Peak # | RetTime [min] | Type | Width [min] | Area [mAU*s] | Height [mAU] | Area %  |
|--------|---------------|------|-------------|--------------|--------------|---------|
| 1      | 5.380         | BB   | 0.3162      | 1999.42310   | 92.50969     | 50.4045 |
| 2      | 10.972        | MM   | 1.2243      | 1967.33508   | 26.78123     | 49.5955 |

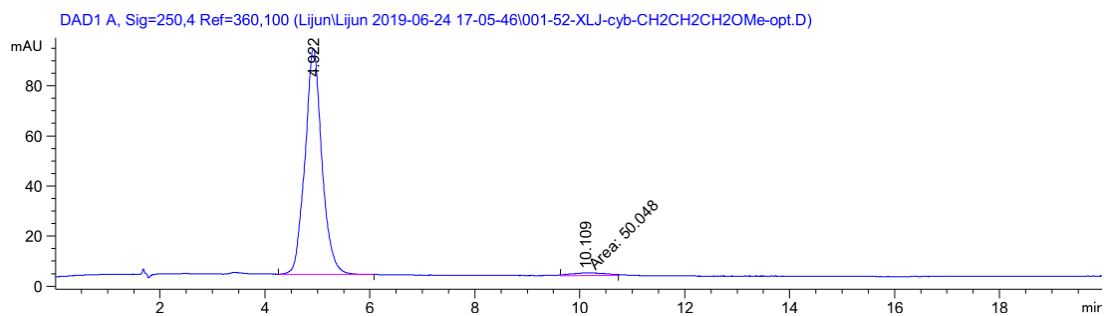

| Peak # | RetTime [min] | Type | Width [min] | Area [mAU*s] | Height [mAU] | Area %  |
|--------|---------------|------|-------------|--------------|--------------|---------|
| 1      | 4.922         | BB   | 0.3302      | 2022.87451   | 89.99692     | 97.5856 |
| 2      | 10.109        | MM   | 0.7764      | 50.04798     | 1.07438      | 2.4144  |

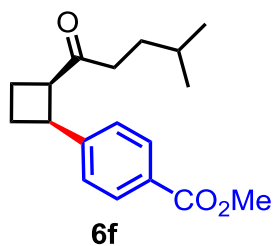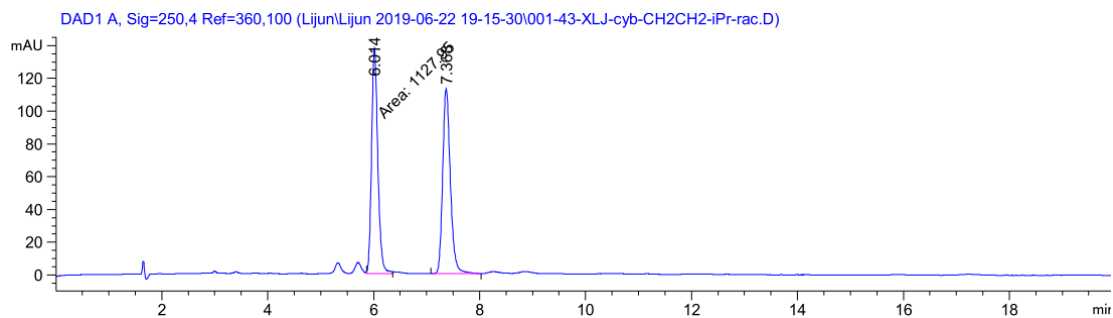

| Peak # | RetTime [min] | Type | Width [min] | Area [mAU*s] | Height [mAU] | Area %  |
|--------|---------------|------|-------------|--------------|--------------|---------|
| 1      | 6.014         | MM   | 0.1367      | 1127.95349   | 137.56294    | 49.7130 |
| 2      | 7.368         | BB   | 0.1539      | 1140.97644   | 112.89320    | 50.2870 |

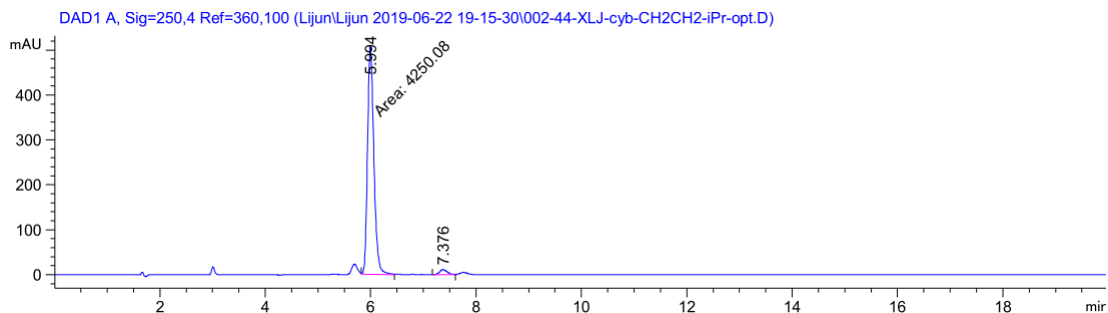

| Peak # | RetTime [min] | Type | Width [min] | Area [mAU*s] | Height [mAU] | Area %  |
|--------|---------------|------|-------------|--------------|--------------|---------|
| 1      | 5.994         | MM   | 0.1398      | 4250.07520   | 506.61185    | 97.3902 |
| 2      | 7.376         | BV   | 0.1529      | 113.89037    | 11.36409     | 2.6098  |

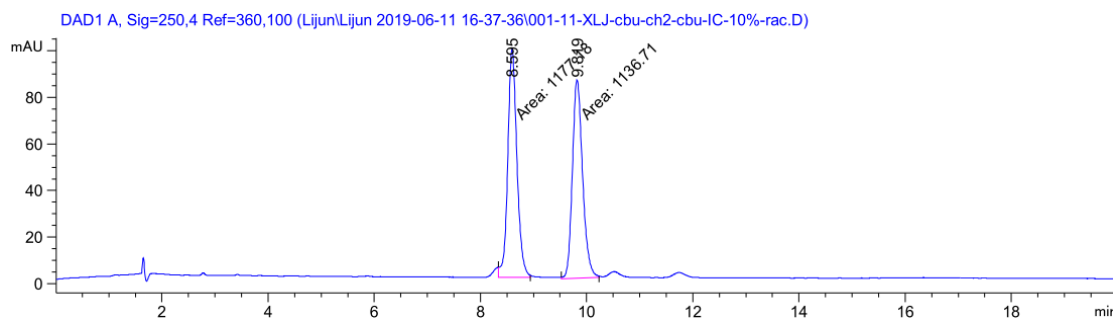

| Peak # | RetTime [min] | Type | Width [min] | Area [mAU*s] | Height [mAU] | Area %  |
|--------|---------------|------|-------------|--------------|--------------|---------|
| 1      | 8.595         | MM   | 0.2001      | 1177.17749   | 98.03753     | 50.8745 |
| 2      | 9.819         | MM   | 0.2226      | 1136.70911   | 85.09312     | 49.1255 |

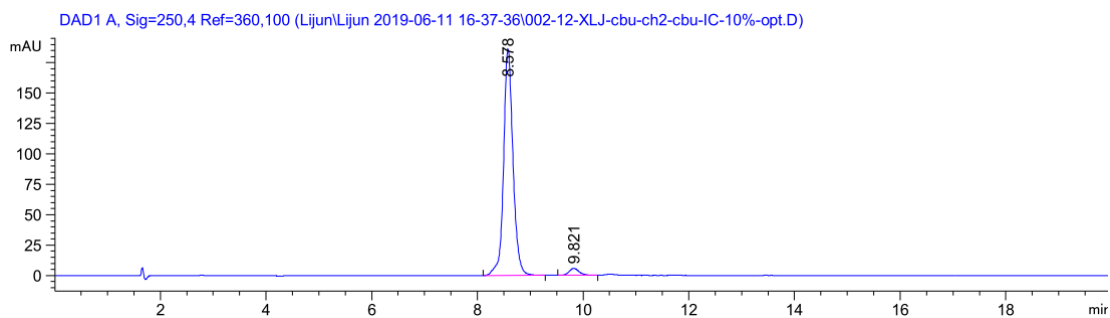

| Peak # | RetTime [min] | Type | Width [min] | Area [mAU*s] | Height [mAU] | Area %  |
|--------|---------------|------|-------------|--------------|--------------|---------|
| 1      | 8.578         | BB   | 0.1882      | 2301.31250   | 186.14893    | 96.8306 |
| 2      | 9.821         | BB   | 0.2059      | 75.32481     | 5.71003      | 3.1694  |



DAD1 A, Sig=250,4 Ref=360,100 (Lijun\Lijun 2019-07-26 15-47-15\003-43-XLJ-CH2-Cy-rac.D)

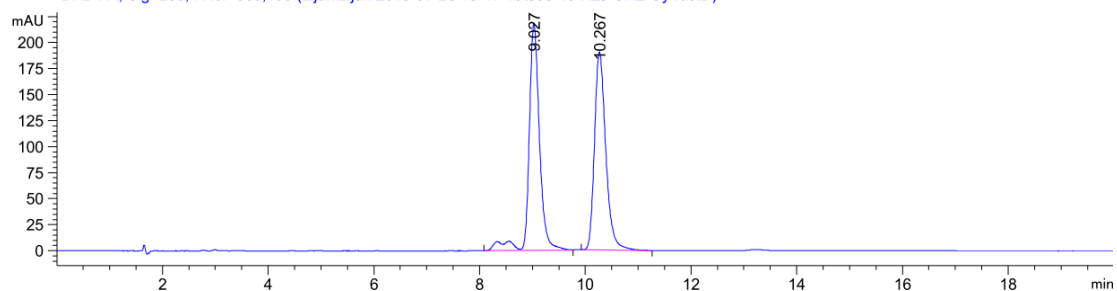

| Peak # | RetTime [min] | Type | Width [min] | Area [mAU*s] | Height [mAU] | Area %  |
|--------|---------------|------|-------------|--------------|--------------|---------|
| 1      | 9.027         | VB R | 0.1975      | 3035.80908   | 217.80962    | 51.8482 |
| 2      | 10.267        | BB   | 0.2269      | 2819.38086   | 190.23552    | 48.1518 |

DAD1 A, Sig=250,4 Ref=360,100 (Lijun\Lijun 2019-07-26 15-47-15\004-44-XLJ-CH2-Cy-opt.D)

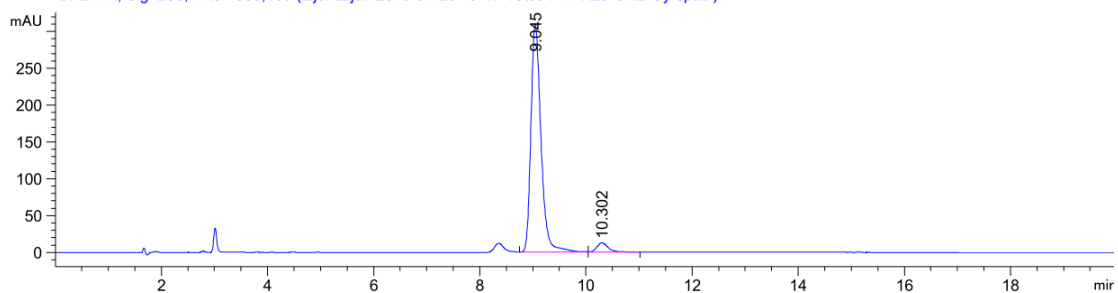

| Peak # | RetTime [min] | Type | Width [min] | Area [mAU*s] | Height [mAU] | Area %  |
|--------|---------------|------|-------------|--------------|--------------|---------|
| 1      | 9.045         | VV   | 0.2020      | 4097.41992   | 310.36560    | 95.6101 |
| 2      | 10.302        | VB   | 0.2260      | 188.13153    | 12.61137     | 4.3899  |

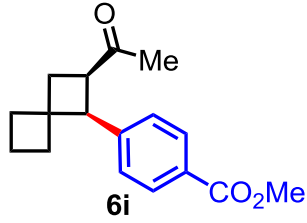

DAD1 A, Sig=250,4 Ref=360,100 (Lijun\Lijun 2019-08-14 16-12-24\001-44-XLJ-spiro-4CO2Me-rac.D)

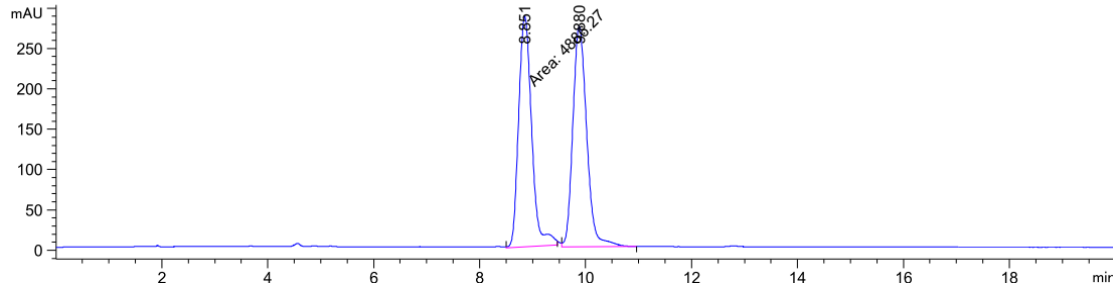

| Peak # | RetTime [min] | Type | Width [min] | Area [mAU*s] | Height [mAU] | Area %  |
|--------|---------------|------|-------------|--------------|--------------|---------|
| 1      | 8.851         | MM   | 0.2850      | 4886.26807   | 285.75439    | 49.5690 |
| 2      | 9.880         | VB   | 0.2845      | 4971.24268   | 272.92963    | 50.4310 |

DAD1 A, Sig=250,4 Ref=360,100 (Lijun\Lijun 2019-08-06 16-10-29\002-42-XLJ-spiro-4-CO2Me-opt.D)

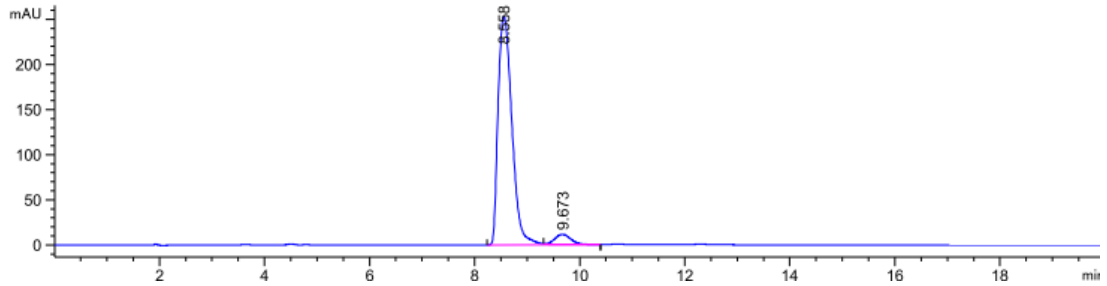

| Peak # | RetTime [min] | Type | Width [min] | Area [mAU*s] | Height [mAU] | Area %  |
|--------|---------------|------|-------------|--------------|--------------|---------|
| 1      | 8.558         | BV R | 0.2930      | 4619.13281   | 253.03453    | 94.9575 |
| 2      | 9.673         | VB E | 0.3352      | 245.28772    | 11.48527     | 5.0425  |

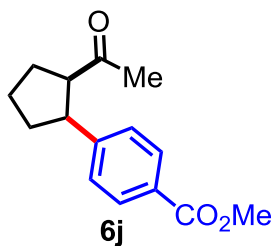

DAD1 A, Sig=250,4 Ref=360,100 (Lijun\Lijun 2019-05-17 14-43-22\001-61-XLJ-Cyp-IC-10%-2.0-rac.D)

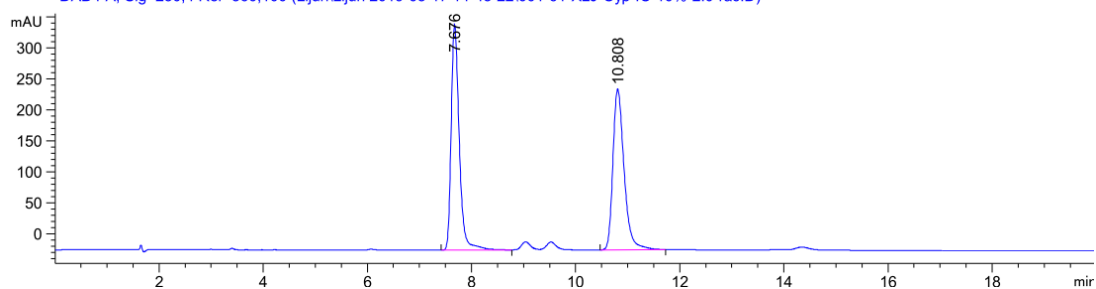

| Peak # | RetTime [min] | Type | Width [min] | Area [mAU*s] | Height [mAU] | Area %  |
|--------|---------------|------|-------------|--------------|--------------|---------|
| 1      | 7.676         | BB   | 0.1631      | 3898.86230   | 363.62344    | 50.2546 |
| 2      | 10.808        | BB   | 0.2277      | 3859.35083   | 259.26367    | 49.7454 |

DAD1 A, Sig=250,4 Ref=360,100 (Lijun\Lijun 2019-09-26 21-22-53\002-2-XLJ-Cyp-ketone-Ag3PO4.D)

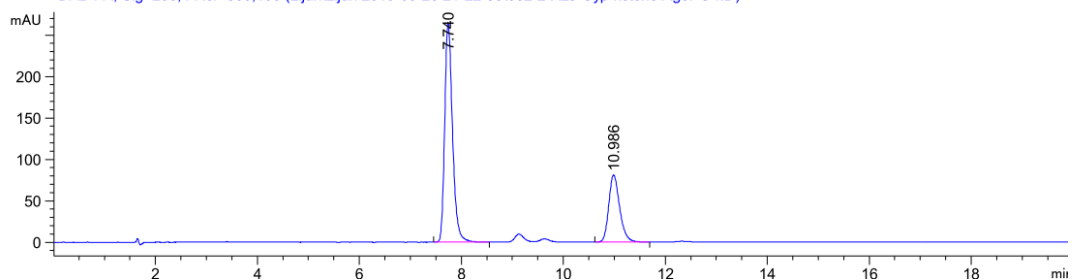

| Peak # | RetTime [min] | Type | Width [min] | Area [mAU*s] | Height [mAU] | Area %  |
|--------|---------------|------|-------------|--------------|--------------|---------|
| 1      | 7.740         | BB   | 0.1618      | 2809.53735   | 264.68832    | 70.0812 |
| 2      | 10.986        | BB   | 0.2269      | 1199.43445   | 80.91444     | 29.9188 |

DAD1 A, Sig=250,4 Ref=360,100 (Lijun\Lijun 2019-09-26 21-22-53\001-1-XLJ-Cyp-ketone-AgTFA.D)

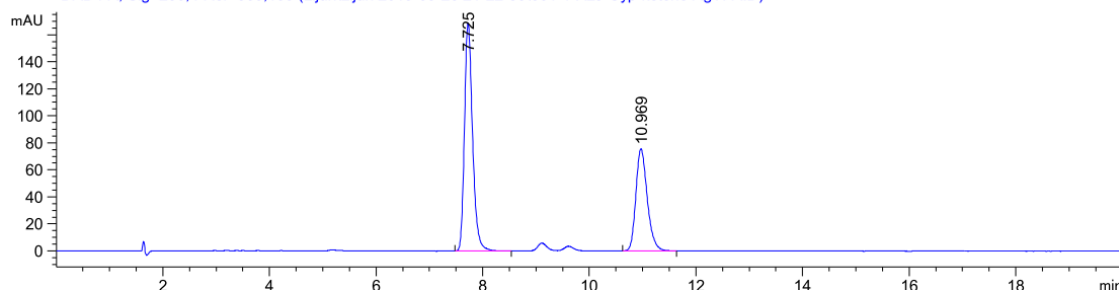

| Peak # | RetTime [min] | Type | Width [min] | Area [mAU*s] | Height [mAU] | Area %  |
|--------|---------------|------|-------------|--------------|--------------|---------|
| 1      | 7.725         | BB   | 0.1611      | 1779.71228   | 168.65359    | 61.3412 |
| 2      | 10.969        | BB   | 0.2270      | 1121.62170   | 75.65052     | 38.6588 |

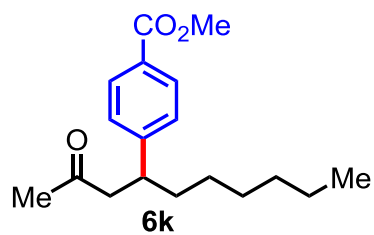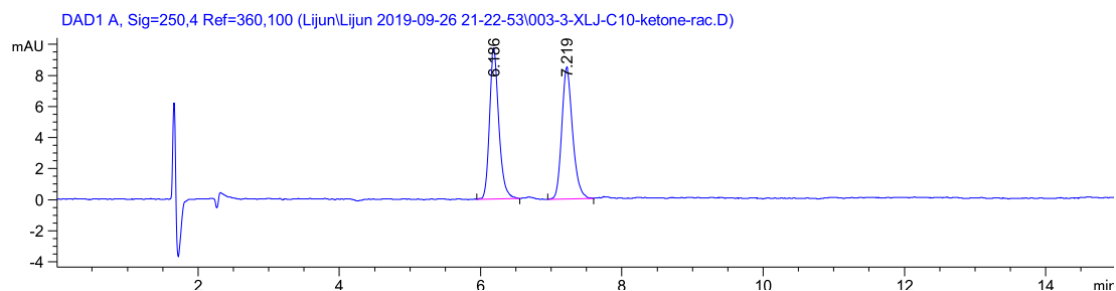

| Peak # | RetTime [min] | Type | Width [min] | Area [mAU*s] | Height [mAU] | Area %  |
|--------|---------------|------|-------------|--------------|--------------|---------|
| 1      | 6.186         | BB   | 0.1417      | 89.70099     | 9.72083      | 49.6040 |
| 2      | 7.219         | BB   | 0.1630      | 91.13331     | 8.50573      | 50.3960 |

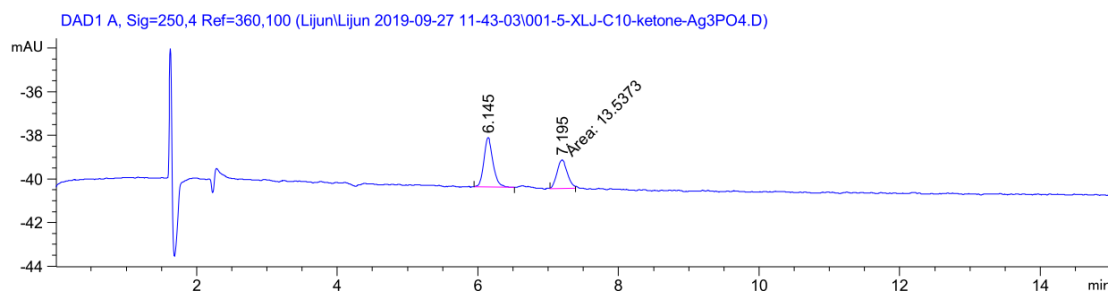

Signal 1: DAD1 A, Sig=250,4 Ref=360,100

| Peak # | RetTime [min] | Type | Width [min] | Area [mAU*s] | Height [mAU] | Area %  |
|--------|---------------|------|-------------|--------------|--------------|---------|
| 1      | 6.145         | BB   | 0.1358      | 20.60308     | 2.27163      | 60.3481 |
| 2      | 7.195         | MM   | 0.1719      | 13.53729     | 1.31283      | 39.6519 |

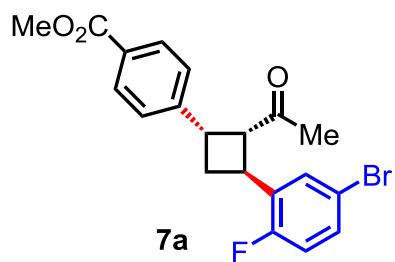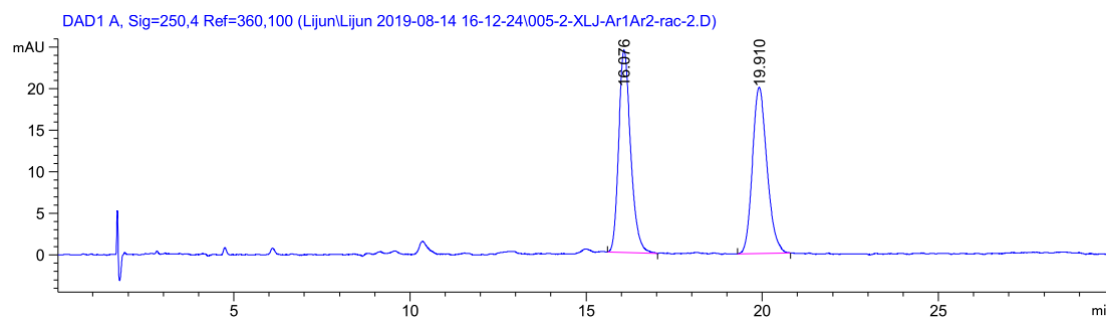

| Peak # | RetTime [min] | Type | Width [min] | Area [mAU*s] | Height [mAU] | Area %  |
|--------|---------------|------|-------------|--------------|--------------|---------|
| 1      | 16.076        | BB   | 0.3591      | 573.62939    | 24.32561     | 49.9344 |
| 2      | 19.910        | BB   | 0.4295      | 575.13672    | 19.99709     | 50.0656 |

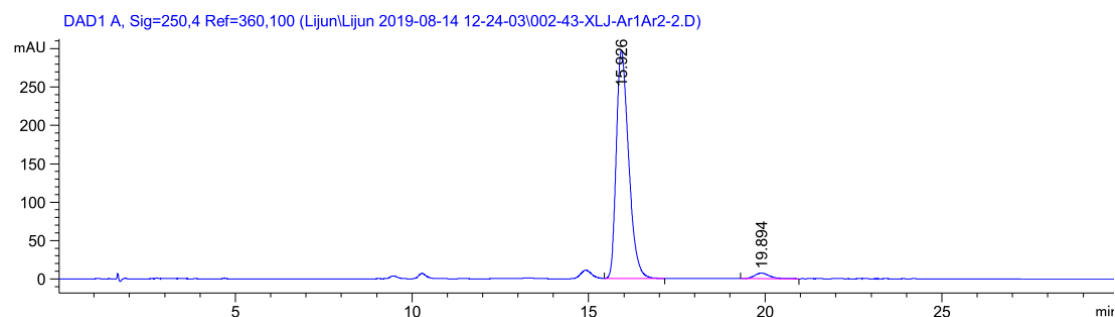

| Peak # | RetTime [min] | Type | Width [min] | Area [mAU*s] | Height [mAU] | Area %  |
|--------|---------------|------|-------------|--------------|--------------|---------|
| 1      | 15.926        | VB   | 0.3756      | 7237.36621   | 297.71201    | 97.1615 |
| 2      | 19.894        | BB   | 0.4206      | 211.43762    | 7.24318      | 2.8385  |



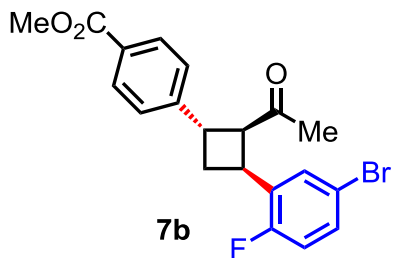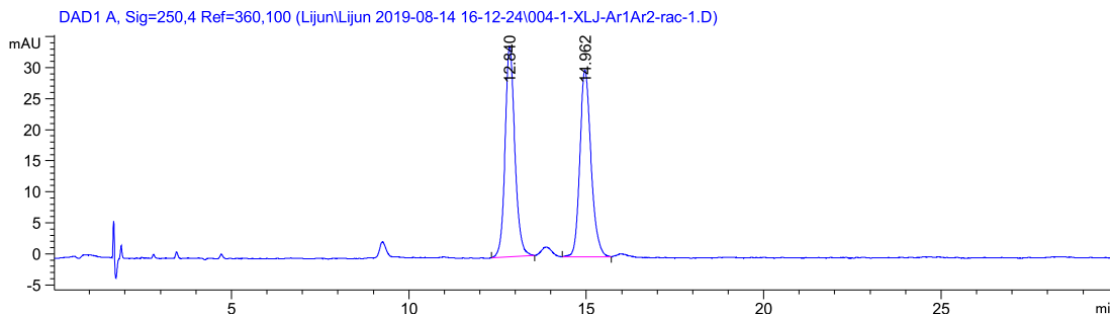

| Peak # | RetTime [min] | Type | Width [min] | Area [mAU*s] | Height [mAU] | Area %  |
|--------|---------------|------|-------------|--------------|--------------|---------|
| 1      | 12.840        | BB   | 0.2930      | 648.24231    | 33.90818     | 49.6508 |
| 2      | 14.962        | BB   | 0.3368      | 657.36176    | 30.09581     | 50.3492 |

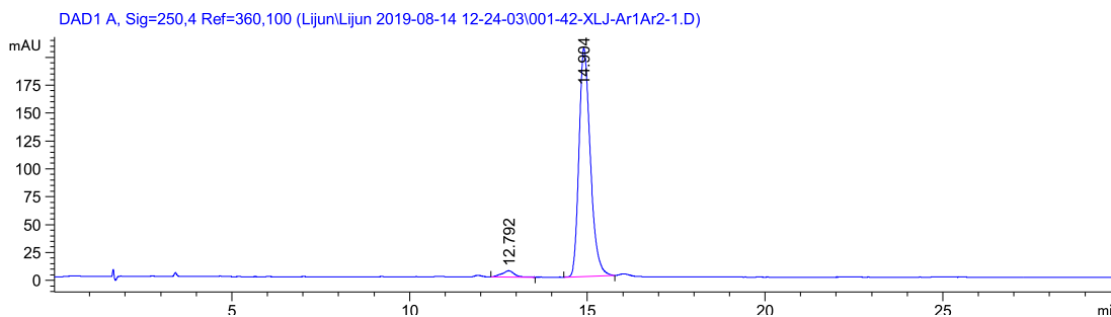

| Peak # | RetTime [min] | Type | Width [min] | Area [mAU*s] | Height [mAU] | Area %  |
|--------|---------------|------|-------------|--------------|--------------|---------|
| 1      | 12.792        | BB   | 0.3387      | 132.55385    | 5.58825      | 2.8320  |
| 2      | 14.904        | BB   | 0.3415      | 4547.95215   | 204.47549    | 97.1680 |

## 10. X-Ray Crystallographic Data

Figure S1. X-Ray Structure of 7a

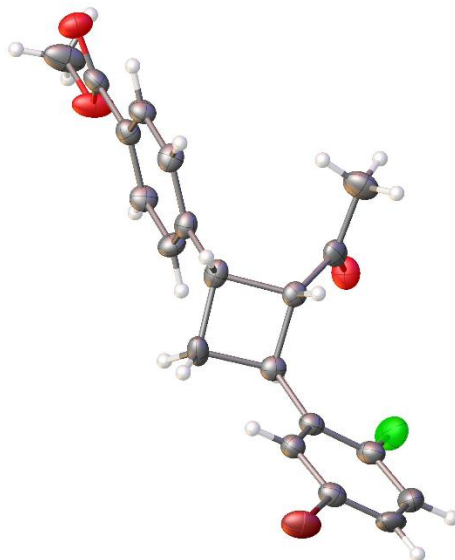

Table S6. Crystal data and structure refinement for 7a

|                                 |                                                   |          |
|---------------------------------|---------------------------------------------------|----------|
| CCDC number                     | 1965052                                           |          |
| Empirical formula               | C <sub>20</sub> H <sub>18</sub> BrFO <sub>3</sub> |          |
| Formula weight                  | 405.25                                            |          |
| Temperature                     | 100.0 K                                           |          |
| Wavelength                      | 1.54178 Å                                         |          |
| Crystal system                  | Orthorhombic                                      |          |
| Space group                     | P2 <sub>1</sub> 2 <sub>1</sub> 2 <sub>1</sub>     |          |
| Unit cell dimensions            | a = 6.0286(2) Å                                   | α = 90°. |
|                                 | b = 15.4711(6) Å                                  | β = 90°. |
|                                 | c = 18.9210(5) Å                                  | γ = 90°. |
| Volume                          | 1764.74(10) Å <sup>3</sup>                        |          |
| Z                               | 4                                                 |          |
| Density (calculated)            | 1.525 Mg/m <sup>3</sup>                           |          |
| Absorption coefficient          | 3.404 mm <sup>-1</sup>                            |          |
| F(000)                          | 824                                               |          |
| Crystal size                    | 0.22 x 0.2 x 0.08 mm <sup>3</sup>                 |          |
| Crystal color, habit            | colourless plate                                  |          |
| Theta range for data collection | 3.690 to 66.738°.                                 |          |
| Index ranges                    | -6 ≤ h ≤ 7, -18 ≤ k ≤ 18, -19 ≤ l ≤ 22            |          |
| Reflections collected           | 12284                                             |          |
| Independent reflections         | 3121 [R(int) = 0.0310]                            |          |

|                                   |                                             |
|-----------------------------------|---------------------------------------------|
| Completeness to theta = 66.738°   | 99.8 %                                      |
| Absorption correction             | Semi-empirical from equivalents             |
| Max. and min. transmission        | 0.5201 and 0.3722                           |
| Refinement method                 | Full-matrix least-squares on F <sup>2</sup> |
| Data / restraints / parameters    | 3121 / 0 / 228                              |
| Goodness-of-fit on F <sup>2</sup> | 1.041                                       |
| Final R indices [I>2sigma(I)]     | R1 = 0.0255, wR2 = 0.0628                   |
| R indices (all data)              | R1 = 0.0277, wR2 = 0.0639                   |
| Absolute structure parameter      | -0.016(8)                                   |
| Extinction coefficient            | n/a                                         |
| Largest diff. peak and hole       | 0.399 and -0.228 e.Å <sup>-3</sup>          |

**Figure S2.** X-Ray Structure of **7b**

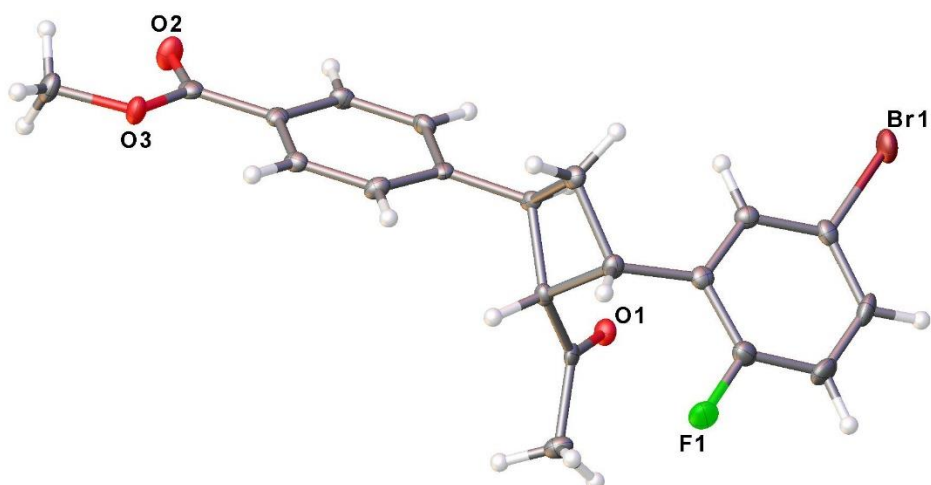

**Table S7.** Crystal data and structure refinement for **7b**

|                      |                                                   |                 |
|----------------------|---------------------------------------------------|-----------------|
| CCDC number          | 1965051                                           |                 |
| Empirical formula    | C <sub>20</sub> H <sub>18</sub> BrFO <sub>3</sub> |                 |
| Formula weight       | 405.25                                            |                 |
| Temperature          | 100.0 K                                           |                 |
| Wavelength           | 0.71073 Å                                         |                 |
| Crystal system       | Monoclinic                                        |                 |
| Space group          | P 21                                              |                 |
| Unit cell dimensions | a = 5.5793(7) Å                                   | α = 90°.        |
|                      | b = 7.6061(7) Å                                   | β = 95.929(5)°. |
|                      | c = 20.604(3) Å                                   | γ = 90°.        |
| Volume               | 869.69(18) Å <sup>3</sup>                         |                 |
| Z                    | 2                                                 |                 |

|                                   |                                             |
|-----------------------------------|---------------------------------------------|
| Density (calculated)              | 1.548 Mg/m <sup>3</sup>                     |
| Absorption coefficient            | 2.389 mm <sup>-1</sup>                      |
| F(000)                            | 412                                         |
| Crystal size                      | 0.3 x 0.2 x 0.1 mm <sup>3</sup>             |
| Theta range for data collection   | 1.987 to 27.115°.                           |
| Index ranges                      | -7<=h<=7, -9<=k<=9, -26<=l<=22              |
| Reflections collected             | 6891                                        |
| Independent reflections           | 3595 [R(int) = 0.0294]                      |
| Completeness to theta = 25.242°   | 99.5 %                                      |
| Absorption correction             | Semi-empirical from equivalents             |
| Max. and min. transmission        | 0.7455 and 0.6028                           |
| Refinement method                 | Full-matrix least-squares on F <sup>2</sup> |
| Data / restraints / parameters    | 3595 / 1 / 228                              |
| Goodness-of-fit on F <sup>2</sup> | 0.866                                       |
| Final R indices [I>2sigma(I)]     | R1 = 0.0284, wR2 = 0.0578                   |
| R indices (all data)              | R1 = 0.0342, wR2 = 0.0595                   |
| Absolute structure parameter      | 0.029(6)                                    |
| Largest diff. peak and hole       | 0.394 and -0.440 e.Å <sup>-3</sup>          |
